# Supplementary material
Source: publisher figshare collection journal article supplement (https://acs.figshare.com/ndownloader/files/3880198)
Supplement: Supplementary file 1 [file 3880198]

**A Facile Access to Enantioenriched Isoindolines *via* One-Pot  
Sequential Cu(I)-Catalyzed Asymmetric 1,3-Dipolar  
Cycloaddition/Oxidation**

Zhao-Lin He, Tang-Lin Liu, Haiyan Tao, and Chun-Jiang Wang\*

Table of Contents

|       |                                                                                                                                  |          |
|-------|----------------------------------------------------------------------------------------------------------------------------------|----------|
| I.    | General Remarks.....                                                                                                             | S2       |
| II.   | Ligand Screening for one pot and sequential catalytic asymmetric 1,3-DC/<br>oxidation reaction.....                              | S2-S3    |
| III.  | General Procedure for Cu(I)/( <i>S,R<sub>p</sub></i> )-PPFOMe-Catalyzed Asymmetric 1,3-<br>Dipolar Cycloaddition/ Oxidation..... | S3-S16   |
| IV.   | The Absolute Configuration Determination of (1 <i>R</i> ,3 <i>R</i> )- <b>5b</b> .....                                           | S16      |
| V.    | Proposed Relative Configuration of Intermediate in This One-Pot Sequential<br>Catalytic Asymmetric 1,3-DC/Oxidation.....         | S17-S18  |
| VI.   | The Relative Configuration Determination of Racemic <i>endo</i> - <b>9</b> .....                                                 | S19      |
| VII.  | References.....                                                                                                                  | S19      |
| VIII. | <sup>1</sup> H NMR and <sup>13</sup> C NMR Spectra.....                                                                          | S20-S62  |
| IX.   | HPLC Chromatograms.....                                                                                                          | S63-S102 |

## I. General Remarks.

$^1\text{H}$  NMR spectra were recorded on a VARIAN Mercury 300 MHz or Bruker 400 MHz spectrometer in  $\text{CDCl}_3$ .  $^{13}\text{C}$  NMR spectra were recorded on a VARIAN Mercury 75 MHz or Bruker 100 MHz spectrometer in  $\text{CDCl}_3$ . Commercially obtained reagents were used without further purification. All reactions were monitored by TLC with silica gel-coated plates. Diastereomeric ratios were determined from crude  $^1\text{H}$  NMR or HPLC analysis. Enantiomeric excesses were determined by HPLC, using a chiralpak AD-H column, a chiralpak AS-H column or a chiralcel OD-H column with hexane and *i*-PrOH as solvents. (*S,R<sub>p</sub>*)-**L6** were prepared according to the literature procedure.<sup>1</sup> The racemic adducts were attained by using  $\text{Cu}(\text{CN})_4\text{BF}_4/\text{PPh}_3$  as the catalyst. The absolute (1*R*,3*R*)-**5b** achieved by  $\text{Cu}(\text{CN})_4\text{BF}_4/(\textit{S,R}_p)\text{-PPFOMe}$  was determined unequivocally according to the X-ray diffraction analysis, and those of other adducts were deduced on the basis of these results.<sup>2</sup>

## II. Ligand Screening for One Pot and Sequential Catalytic Asymmetric 1,3-DC/Oxidation Reaction

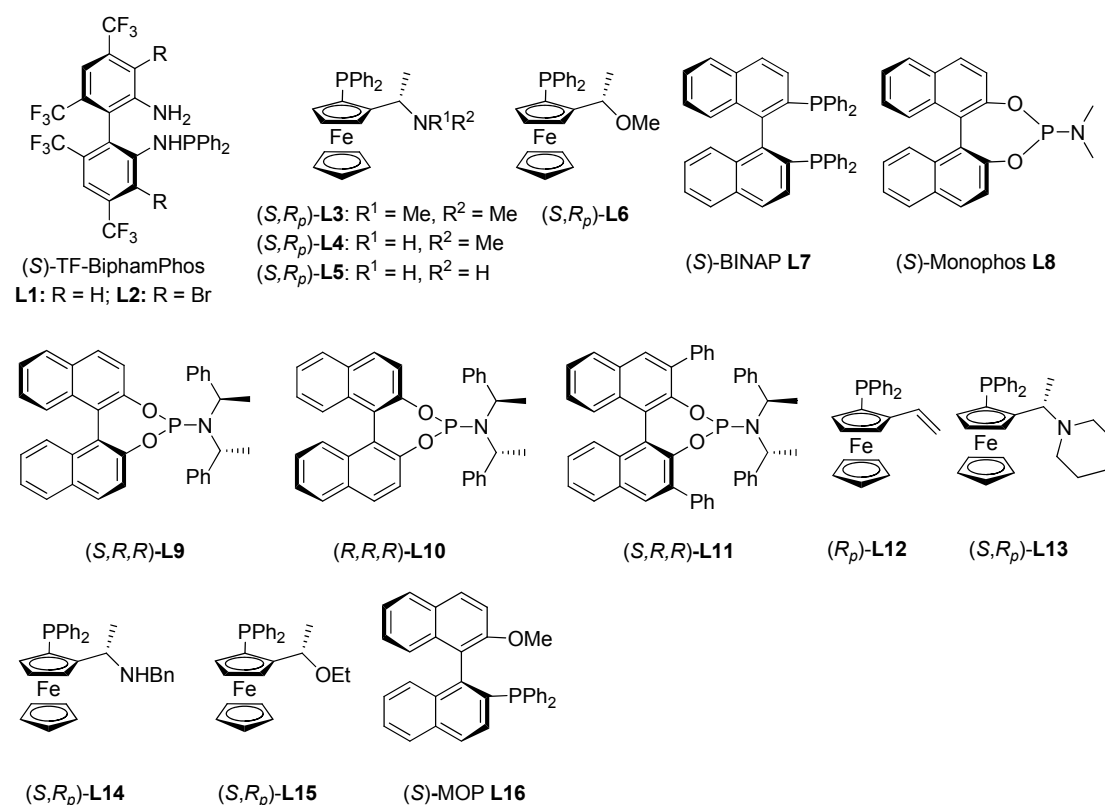

**Scheme 1.** Screened chiral ligands.

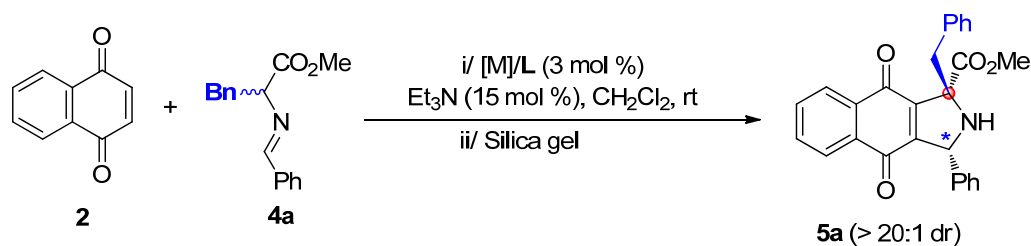

| entry | L   | [M]                                                 | time/h | yield (%) <sup>b</sup> | ee (%) <sup>c</sup> |
|-------|-----|-----------------------------------------------------|--------|------------------------|---------------------|
| 1     | L1  | AgOAc                                               | 6      | 81                     | 20                  |
| 2     | L1  | Cu(CH <sub>3</sub> CN) <sub>4</sub> BF <sub>4</sub> | 6      | 87                     | 9                   |
| 3     | L2  | AgOAc                                               | 6      | 86                     | 27                  |
| 4     | L2  | Cu(CH <sub>3</sub> CN) <sub>4</sub> BF <sub>4</sub> | 6      | 85                     | 37                  |
| 5     | L3  | AgOAc                                               | 4      | 76                     | 9                   |
| 6     | L3  | Cu(CH <sub>3</sub> CN) <sub>4</sub> BF <sub>4</sub> | 4      | 85                     | 71                  |
| 7     | L4  | Cu(CH <sub>3</sub> CN) <sub>4</sub> BF <sub>4</sub> | 4      | 69                     | 69                  |
| 8     | L5  | Cu(CH <sub>3</sub> CN) <sub>4</sub> BF <sub>4</sub> | 4      | 74                     | 22                  |
| 9     | L6  | Cu(CH <sub>3</sub> CN) <sub>4</sub> BF <sub>4</sub> | 4      | 85                     | 78                  |
| 10    | L7  | AgOAc                                               | 12     | 31                     | 2                   |
| 11    | L7  | Cu(CH <sub>3</sub> CN) <sub>4</sub> BF <sub>4</sub> | 12     | 34                     | 4                   |
| 12    | L8  | AgOAc                                               | 4      | 65                     | 7                   |
| 13    | L8  | Cu(CH <sub>3</sub> CN) <sub>4</sub> BF <sub>4</sub> | 4      | 50                     | 13                  |
| 14    | L9  | Cu(CH <sub>3</sub> CN) <sub>4</sub> BF <sub>4</sub> | 4      | 70                     | 66                  |
| 15    | L10 | Cu(CH <sub>3</sub> CN) <sub>4</sub> BF <sub>4</sub> | 4      | 71                     | 51                  |
| 16    | L11 | Cu(CH <sub>3</sub> CN) <sub>4</sub> BF <sub>4</sub> | 4      | 82                     | 14                  |
| 17    | L12 | Cu(CH <sub>3</sub> CN) <sub>4</sub> BF <sub>4</sub> | 4      | 78                     | 63                  |
| 18    | L13 | Cu(CH <sub>3</sub> CN) <sub>4</sub> BF <sub>4</sub> | 4      | 67                     | 71                  |
| 19    | L14 | Cu(CH <sub>3</sub> CN) <sub>4</sub> BF <sub>4</sub> | 4      | 75                     | 37                  |
| 20    | L15 | Cu(CH <sub>3</sub> CN) <sub>4</sub> BF <sub>4</sub> | 4      | 82                     | 65                  |
| 21    | L16 | Cu(CH <sub>3</sub> CN) <sub>4</sub> BF <sub>4</sub> | 4      | 78                     | 13                  |

<sup>a</sup> All reactions were carried out with 0.26 mmol of **4a** and 0.20 mmol of **2** in 2 mL of CH<sub>2</sub>Cl<sub>2</sub>. <sup>b</sup> Isolated yield. <sup>c</sup> Determined by HPLC analysis.

### III. General Procedure for Cu(I)/(*S,R*<sub>p</sub>)-PPFOMe-Catalyzed Asymmetric 1,3-Dipolar Cycloaddition/Oxidation

Under argon atmosphere, (*S,R*<sub>p</sub>)-PPFOMe (3.1 mg, 0.0072 mmol) and Cu(CH<sub>3</sub>CN)<sub>4</sub>BF<sub>4</sub> (1.9 mg, 0.006 mmol) were dissolved in toluene (2 mL), and stirred at room temperature for about 1 h. Then, imine substrate (0.26 mmol), and naphthoquinone (0.2 mmol) were added sequentially, after that the mixture was dropped to -20 °C, TEA (3 mg, 0.03 mmol) was added. Once starting material was

consumed (monitored by TLC), The reaction mixture was treated with silica gel for a short time, then the organic solvent was removed and the residue was purified by column chromatography to give the product, which was then directly analyzed by chiral HPLC to determine the enantiomeric excess.

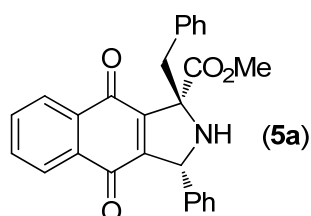

**(1R,3R)-methyl 1-benzyl-4,9-dioxo-3-phenyl-2,3,4,9-tetrahydro-1H-benzo[f]isoindole-1-carboxylate**

The title compound was prepared according to the general procedure as described above in 86% yield. m.p. 118-121 °C;  $[\alpha]_D^{25} = +128.2$  (*c* 1.36, CHCl<sub>3</sub>); <sup>1</sup>H NMR (CDCl<sub>3</sub>, TMS, 300 MHz) δ 8.16 (d, *J* = 7.8 Hz, 1H), 7.88 (d, *J* = 7.8 Hz, 1H), 7.76-7.68 (m, 2H), 7.34-7.15 (m, 10H), 4.88 (s, 1H), 3.85 (s, 3H), 3.63 (d, *J* = 14.1 Hz, 1H), 3.46 (d, *J* = 14.1 Hz, 1H), 2.60-2.80 (br, 1H); <sup>13</sup>C NMR (CDCl<sub>3</sub>, TMS, 75 MHz) δ 182.4, 181.6, 172.6, 150.6, 146.4, 141.2, 135.6, 133.8, 132.7, 130.3, 128.4, 128.2, 127.9, 127.7, 127.1, 126.4, 126.3, 75.4, 67.1, 52.9, 41.9; <sup>13</sup>C NMR (DMSO-*d*<sub>6</sub>, TMS, 100 MHz) δ 182.0, 180.8, 171.8, 149.6, 146.4, 142.2, 135.8, 134.4, 134.3, 131.8, 131.6, 129.7, 127.8, 127.7, 127.1, 126.6, 125.9, 125.8, 74.5, 66.4, 52.3, 40.7; IR (KBr)  $\nu$  3382, 3061, 3026, 2957, 2848, 2167, 1740, 1635, 1593, 1494, 1454, 1635, 1297, 1247, 1045, 909, 774, 736, 702 cm<sup>-1</sup>. HRMS: calcd. for C<sub>27</sub>H<sub>22</sub>NO<sub>4</sub><sup>+</sup>: 424.1543, found 424.1537. The product was analyzed by HPLC to determine the enantiomeric excess: 96% *ee* (Chiralpak AS-H, *i*-propanol/hexane = 20/80, flow rate 1.0 mL/min,  $\lambda$  = 220 nm); *t*<sub>r</sub> = 11.59 and 33.88 min.

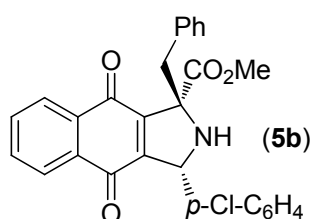



**(1*R*,3*R*)-methyl 1-benzyl-3-(4-chlorophenyl)-4,9-dioxo-2,3,4,9-tetrahydro-1H-benzo[*f*]isoindole-1-carboxylate**

The title compound was prepared according to the general procedure as described above in 89% yield. m.p. 112-115 °C;  $[\alpha]_D^{25} = +97.4$  (*c* 1.60, CHCl<sub>3</sub>); <sup>1</sup>H NMR (CDCl<sub>3</sub>, TMS, 300 MHz) δ 8.16 (d, *J* = 7.5 Hz, 1H), 7.82 (d, *J* = 7.5 Hz, 1H), 7.79-7.68 (m, 2H), 7.31-7.19 (m, 7H), 7.12 (m, 2H), 4.84 (s, 1H), 3.85 (s, 3H), 3.63 (d, *J* = 13.8 Hz, 1H), 3.46 (d, *J* = 13.8 Hz, 1H); <sup>13</sup>C NMR (CDCl<sub>3</sub>, TMS, 75 MHz) δ 182.3, 181.5, 172.5, 150.0, 146.4, 139.8, 135.4, 133.9, 133.6, 132.6, 130.7, 130.2, 129.2, 128.5, 128.3, 127.6, 127.1, 126.5, 126.3, 75.3, 66.3, 52.9, 41.6; IR (KBr) ν 3380, 1741, 1667, 1637, 1594, 1491, 1339, 1219, 1089, 704 cm<sup>-1</sup>. HRMS: calcd. for C<sub>27</sub>H<sub>21</sub>ClNO<sub>4</sub><sup>+</sup>: 458.1154, found. 458.1148. The product was analyzed by HPLC to determine the enantiomeric excess: 95% *ee* (Chiralpak AS-H, *i*-propanol/hexane = 40/60, flow rate 1.0 mL/min, λ = 220 nm); t<sub>r</sub> = 8.07 and 20.86 min.

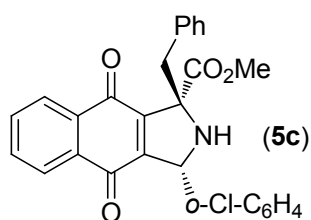

**(1*R*,3*S*)-methyl 1-benzyl-3-(2-chlorophenyl)-4,9-dioxo-2,3,4,9-tetrahydro-1H-benzo[*f*]isoindole-1-carboxylate**

The title compound was prepared according to the general procedure as described above in 87% yield. m.p. 129-132 °C;  $[\alpha]_D^{25} = +75.4$  (*c* 1.54, CHCl<sub>3</sub>); <sup>1</sup>H NMR (CDCl<sub>3</sub>, TMS, 300 MHz) δ 8.18 (d, *J* = 7.5 Hz, 1H), 7.92 (d, *J* = 7.5 Hz, 1H), 7.90-7.71 (m, 2H), 7.35-7.32 (m, 1H), 7.24-7.15 (m, 8H), 5.36 (s, 1H), 3.80 (s, 3H), 3.63 (d, *J* = 14.1 Hz, 1H), 3.47 (d, *J* = 14.1 Hz, 1H), 2.79 (br, 1H); <sup>13</sup>C NMR (CDCl<sub>3</sub>, TMS, 75 MHz) δ 182.1, 181.1, 172.2, 150.2, 147.3, 138.6, 135.2, 133.7, 133.1, 132.6, 132.5, 130.0, 129.3, 129.0, 128.8, 128.2, 127.1, 127.0, 126.4, 126.3, 75.1, 62.6, 52.7, 41.4; <sup>13</sup>C NMR (DMSO-*d*<sub>6</sub>, TMS, 100 MHz) δ 181.9, 180.5, 171.7, 149.4, 147.2, 139.6, 135.7, 134.6, 134.5, 132.0, 131.7, 131.6, 129.8, 129.7, 128.8, 128.7, 127.8, 127.2, 126.8, 126.0, 125.9, 74.5, 62.0, 52.4, 40.5; IR (KBr) ν 3374, 2951, 2168, 1740,

1637, 1593, 1496, 1474, 1438, 1368, 1340, 1297, 1253, 1050, 906, 798, 755, 742, 705  $\text{cm}^{-1}$ . HRMS: calcd. for  $\text{C}_{27}\text{H}_{21}\text{ClNO}_4^+$ : 458.1154, found. 458.1150. The product was analyzed by HPLC to determine the enantiomeric excess: 94% *ee* (Chiralpak AS-H, *i*-propanol/hexane = 30/70, flow rate 1.0 mL/min,  $\lambda$  = 220 nm);  $t_r$  = 8.79 and 26.77 min.

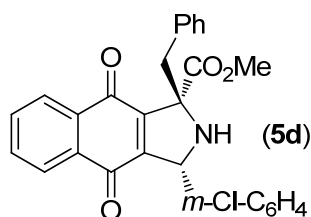

**(1*R*,3*R*)-methyl 1-benzyl-3-(3-chlorophenyl)-4,9-dioxo-2,3,4,9-tetrahydro-1H-benzo[f]isoindole-1-carboxylate**

The title compound was prepared according to the general procedure as described above in 87% yield. m.p. 176-179 °C;  $[\alpha]_D^{25} = +59.0$  (*c* 1.52,  $\text{CHCl}_3$ );  $^1\text{H}$  NMR ( $\text{CDCl}_3$ , TMS, 300 MHz)  $\delta$  8.15 (m, 1H), 7.88 (m, 1H), 7.77-7.70 (m, 2H), 7.38 (m, 1H), 7.21-7.19 (m, 7H), 7.11-7.10 (m, 1H), 4.85 (s, 1H), 3.87 (s, 3H), 3.63 (d,  $J$  = 14.1 Hz, 1H), 3.46 (d,  $J$  = 14.1 Hz, 1H), 2.60-2.80 (br, 1H);  $^{13}\text{C}$  NMR ( $\text{CDCl}_3$ , TMS, 75 MHz)  $\delta$  182.3, 181.4, 172.4, 149.9, 146.5, 143.4, 135.4, 134.2, 133.9, 132.7, 130.2, 129.5, 128.4, 128.1, 128.0, 127.2, 126.5, 126.4, 126.1, 75.3, 66.5, 52.9, 41.6;  $^{13}\text{C}$  NMR ( $\text{DMSO-d}_6$ , TMS, 100 MHz)  $\delta$  181.9, 180.7, 171.7, 148.9, 146.6, 144.8, 135.7, 134.5, 134.4, 132.4, 131.7, 131.6, 129.6, 127.8, 127.6, 127.1, 126.6, 126.4, 125.9, 125.8, 74.6, 65.8, 52.2, 40.5; IR (KBr)  $\nu$  3382, 2168, 1741, 1637, 1594, 1433, 1369, 1340, 1297, 1249, 1048, 777, 740, 705, 587  $\text{cm}^{-1}$ . HRMS: calcd. for  $\text{C}_{27}\text{H}_{21}\text{ClNO}_4^+$ : 458.1154, found. 458.1146. The product was analyzed by HPLC to determine the enantiomeric excess: 94% *ee* (Chiralpak AS-H, *i*-propanol/hexane = 30/70, flow rate 1.0 mL/min,  $\lambda$  = 220 nm);  $t_r$  = 9.51 and 31.36 min.

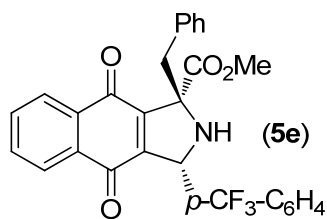

**(1R,3R)-methyl 1-benzyl-4,9-dioxo-3-(4-(trifluoromethyl)phenyl)-2,3,4,9-tetrahydro-1H-benzo[f]isoindole-1-carboxylate**

The title compound was prepared according to the general procedure as described above in 87% yield. m.p. 187-190 °C;  $[\alpha]_D^{25} = +72.6$  (*c* 1.84, CHCl<sub>3</sub>); <sup>1</sup>H NMR (CDCl<sub>3</sub>, TMS, 300 MHz) δ 8.17 (d, *J* = 7.5 Hz, 1H), 7.88 (d, *J* = 7.5 Hz, 1H), 7.80-7.68 (m, 2H), 7.55-7.47 (m, 4H), 7.22-7.10 (m, 5H), 4.92 (s, 1H), 3.86 (s, 3H), 3.65 (d, *J* = 14.1 Hz, 1H), 3.47 (d, *J* = 14.1 Hz, 1H); <sup>13</sup>C NMR (CDCl<sub>3</sub>, TMS, 100 MHz) δ 182.3, 181.5, 172.4, 149.8, 146.7, 145.2, 135.3, 134.0, 133.9, 132.7, 130.2, 129.9 (*J*<sub>C-F</sub> = 32.4 Hz), 128.4, 128.3, 127.3, 126.6, 126.4, 125.3 (*J*<sub>C-F</sub> = 3.7 Hz), 124.0 (*J*<sub>C-F</sub> = 270.3 Hz), 75.4, 66.6, 53.0, 41.6; IR (KBr) ν 3384, 2953, 1742, 1668, 1637, 1618, 1594, 1496, 1436, 1369, 1325, 1249, 1219, 1165, 1124, 1067, 1017, 849, 735, 704, 642, 601 cm<sup>-1</sup>. HRMS: calcd. for C<sub>28</sub>H<sub>21</sub>F<sub>3</sub>NO<sub>4</sub><sup>+</sup>: 492.1409, found. 492.1417. The product was analyzed by HPLC to determine the enantiomeric excess: 92% *ee* (Chiralpak AD-H, *i*-propanol/hexane = 30/70, flow rate 1.0 mL/min, λ = 220 nm); *t*<sub>r</sub> = 8.85 and 10.63 min.

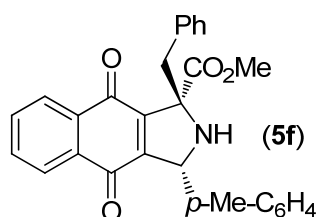

**(1R,3R)-methyl 1-benzyl-4,9-dioxo-3-(p-tolyl)-2,3,4,9-tetrahydro-1H-benzo[f]isoindole-1-carboxylate**

The title compound was prepared according to the general procedure as described above in 93% yield. m.p. 176-178 °C;  $[\alpha]_D^{25} = +156.3$  (*c* 1.62, CHCl<sub>3</sub>); <sup>1</sup>H NMR (CDCl<sub>3</sub>, TMS, 300 MHz) δ 8.15 (d, *J* = 7.8 Hz, 1H), 7.87 (d, *J* = 7.8 Hz, 1H), 7.86-7.67 (m, 2H), 7.21-7.07 (m, 9H), 4.85 (s, 1H), 3.84 (s, 3H), 3.62 (d, *J* = 13.8 Hz,

1H), 3.44 (d,  $J = 13.8$  Hz, 1H), 2.60-2.80 (br, 1H), 2.29 (s, 3H);  $^{13}\text{C}$  NMR ( $\text{CDCl}_3$ , TMS, 75 MHz)  $\delta$  182.4, 181.6, 172.6, 150.7, 146.3, 138.3, 137.5, 135.6, 133.7, 132.7, 130.3, 129.1, 128.1, 127.5, 127.0, 126.4, 126.3, 75.3, 66.8, 52.8, 41.8, 21.1; IR (KBr)  $\nu$  3381, 3029, 2951, 1740, 1634, 1593, 1453, 1339, 1297, 1246, 1045, 816, 771, 735, 704  $\text{cm}^{-1}$ . HRMS: calcd. for  $\text{C}_{28}\text{H}_{24}\text{NO}_4^+$ : 438.1670, found. 438.1695. The product was analyzed by HPLC to determine the enantiomeric excess: 95% *ee* (Chiralpak AS-H, *i*-propanol/hexane = 30/70, flow rate 1.2 mL/min,  $\lambda = 220$  nm);  $t_r = 7.57$  and 20.44 min.

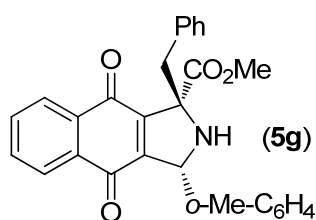

**(1R,3R)-methyl 1-benzyl-4,9-dioxo-3-(*o*-tolyl)-2,3,4,9-tetrahydro-1H-benzo[f]isoindole-1-carboxylate**

The title compound was prepared according to the general procedure as described above in 81% yield. m.p. 135-138 °C;  $[\alpha]_D^{25} = +107.4$  ( $c$  1.50,  $\text{CHCl}_3$ );  $^1\text{H}$  NMR ( $\text{CDCl}_3$ , TMS, 300 MHz)  $\delta$  8.17 (d,  $J = 7.2$  Hz, 1H), 7.89 (d,  $J = 7.2$  Hz, 1H), 7.79-7.67 (m, 2H), 7.19-7.12 (m, 9H), 4.92 (s, 1H), 3.82 (s, 3H), 3.58 (d,  $J = 13.5$  Hz, 1H), 3.46 (d,  $J = 13.5$  Hz, 1H), 2.60-2.80 (br, 1H), 2.34 (s, 3H);  $^{13}\text{C}$  NMR ( $\text{CDCl}_3$ , TMS, 75 MHz)  $\delta$  182.2, 181.4, 172.4, 151.8, 147.2, 139.1, 135.7, 133.7, 132.7, 130.3, 127.9, 127.6, 127.2, 126.9, 126.4, 126.2, 75.1, 62.7, 52.8, 41.9, 19.1; IR (KBr)  $\nu$  3358, 3029, 2950, 1740, 1667, 1593, 1219, 1050, 735  $\text{cm}^{-1}$ . HRMS: calcd. for  $\text{C}_{28}\text{H}_{24}\text{NO}_4^+$ : 438.1670, found. 438.1693. The product was analyzed by HPLC to determine the enantiomeric excess: 93% *ee* (Chiralcel OD-H, *i*-propanol/hexane = 30/70, flow rate 1.0 mL/min,  $\lambda = 220$  nm);  $t_r = 6.33$  and 15.03 min.

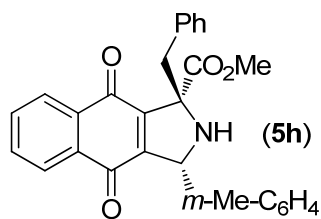

**(1R,3R)-methyl 1-benzyl-4,9-dioxo-3-(m-tolyl)-2,3,4,9-tetrahydro-1H-benzo[f]isoindole-1-carboxylate**

The title compound was prepared according to the general procedure as described above in 86% yield. m.p. 179-182 °C;  $[\alpha]_D^{25} = +113.5$  (*c* 1.48, CHCl<sub>3</sub>); <sup>1</sup>H NMR (CDCl<sub>3</sub>, TMS, 300 MHz)  $\delta$  8.16 (d, *J* = 7.2 Hz, 1H), 7.88 (d, *J* = 7.2 Hz, 1H), 7.76-7.69 (m, 2H), 7.19-7.06 (m, 9H), 4.84 (s, 1H), 3.84 (s, 3H), 3.62 (d, *J* = 14.1 Hz, 1H), 3.45 (d, *J* = 14.1 Hz, 1H), 2.29 (s, 3H); <sup>13</sup>C NMR (CDCl<sub>3</sub>, TMS, 75 MHz)  $\delta$  182.5, 181.6, 172.6, 150.8, 146.4, 141.2, 138.0, 135.6, 133.8, 133.7, 132.8, 130.3, 128.7, 128.5, 128.3, 128.2, 127.0, 126.4, 126.3, 124.8, 75.4, 67.1, 52.8, 41.9, 21.4; IR (KBr)  $\nu$  3383, 3026, 2951, 1741, 1667, 1643, 1593, 1454, 1339, 1296, 1246, 1169, 1044, 733, 704 cm<sup>-1</sup>. HRMS: calcd. for C<sub>28</sub>H<sub>24</sub>NO<sub>4</sub><sup>+</sup>: 438.1670, found. 438.1695. The product was analyzed by HPLC to determine the enantiomeric excess: 97% *ee* (Chiralpak AS-H, *i*-propanol/hexane = 30/70, flow rate 1.0 mL/min,  $\lambda$  = 220 nm); *t*<sub>r</sub> = 7.95 and 19.35 min.

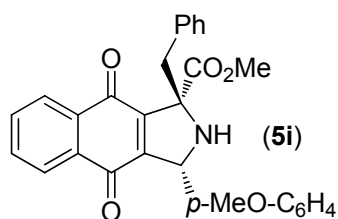

**(1R,3R)-methyl 1-benzyl-3-(4-methoxyphenyl)-4,9-dioxo-2,3,4,9-tetrahydro-1H-benzo[f]isoindole-1-carboxylate**

The title compound was prepared according to the general procedure as described above in 81% yield. m.p. 143-145 °C;  $[\alpha]_D^{25} = +215.9$  (*c* 1.44, CHCl<sub>3</sub>); <sup>1</sup>H NMR (CDCl<sub>3</sub>, TMS, 300 MHz)  $\delta$  8.16 (d, *J* = 7.8 Hz, 1H), 7.88 (d, *J* = 7.8 Hz, 1H), 7.78-7.66 (m, 2H), 7.23-7.15 (m, 7H), 6.81 (d, *J* = 8.1 Hz, 2H), 4.85 (s, 1H), 3.85 (s, 3H), 3.76 (s, 3H), 3.61 (d, *J* = 13.5 Hz, 1H), 3.45 (d, *J* = 13.5 Hz, 1H), 2.60-2.80 (br,

<sup>1</sup>H); <sup>13</sup>C NMR (CDCl<sub>3</sub>, TMS, 75 MHz) δ 182.5, 181.6, 172.7, 159.1, 150.6, 146.1, 135.6, 133.7, 133.4, 132.7, 130.2, 128.8, 128.2, 127.0, 126.4, 126.3, 113.7, 75.2, 66.5, 55.1, 52.9, 41.8; IR (KBr) ν 3381, 3029, 2952, 2837, 1740, 1633, 1593, 1511, 1454, 1367, 1338, 1301, 1246, 1174, 1034, 915, 833, 771, 736, 712, 641, 586, 554 cm<sup>-1</sup>. HRMS: calcd. for C<sub>28</sub>H<sub>24</sub>NO<sub>5</sub><sup>+</sup>: 454.1649, found. 454.1641. The product was analyzed by HPLC to determine the enantiomeric excess: 96% *ee* (Chiralpak AS-H, *i*-propanol/hexane = 30/70, flow rate 1.2 mL/min, λ = 220 nm); t<sub>r</sub> = 13.51 and 39.34 min.

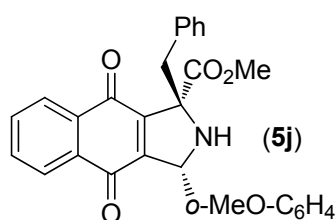

**(1*R*,3*R*)-methyl 1-benzyl-3-(2-methoxyphenyl)-4,9-dioxo-2,3,4,9-tetrahydro-1H-benzo[f]isoindole-1-carboxylate**

The title compound was prepared according to the general procedure as described above in 85% yield. m.p. 149-152 °C; [α]<sub>D</sub><sup>25</sup> = +49.3 (*c* 0.93, CHCl<sub>3</sub>); <sup>1</sup>H NMR (CDCl<sub>3</sub>, TMS, 300 MHz) δ 8.16 (d, *J* = 6.9 Hz, 1H), 7.88 (d, *J* = 6.9 Hz, 1H), 7.87-7.69 (m, 2H), 7.22-7.13 (m, 6H), 6.92-6.89 (m, 2H), 6.77 (d, *J* = 7.5 Hz, 1H), 4.87 (s, 1H), 3.84 (s, 3H), 3.75 (s, 3H), 3.62 (d, *J* = 14.1 Hz, 1H), 3.45 (d, *J* = 14.1 Hz, 1H), 2.69 (br, 1H); <sup>13</sup>C NMR (CDCl<sub>3</sub>, TMS, 75 MHz) δ 182.4, 181.5, 172.6, 159.6, 150.6, 146.3, 142.9, 135.6, 133.8, 133.7, 132.7, 130.3, 129.3, 128.2, 127.1, 126.4, 126.3, 120.1, 113.5, 113.2, 75.4, 67.0, 55.0, 52.9, 41.8; IR (KBr) ν 3382, 3027, 2950, 1740, 1634, 1593, 1508, 1495, 1453, 1434, 1368, 1337, 1296, 1245, 1169, 1045, 860, 819, 771, 731, 704 cm<sup>-1</sup>. HRMS: calcd. for C<sub>28</sub>H<sub>25</sub>NO<sub>5</sub> + H<sup>+</sup>: 456.1806, found. 456.1790. The product was analyzed by HPLC to determine the enantiomeric excess: 94% *ee* (Chiralpak AS-H, *i*-propanol/hexane = 30/70, flow rate 1.0 mL/min, λ = 220 nm); t<sub>r</sub> = 11.87 and 33.47 min.

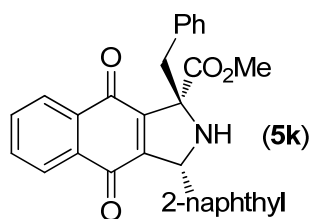

**(1*R*,3*R*)-methyl 1-benzyl-3-(naphthalen-2-yl)-4,9-dioxo-2,3,4,9-tetrahydro-1H-benzo[f]isoindole-1-carboxylate**

The title compound was prepared according to the general procedure as described above in 79% yield. m.p. 198-201 °C;  $[\alpha]_D^{25} = +43.1$  (*c* 1.46, CHCl<sub>3</sub>); <sup>1</sup>H NMR (CDCl<sub>3</sub>, TMS, 300 MHz) δ 8.17 (d, *J* = 7.5 Hz, 1H), 7.84 (d, *J* = 7.5 Hz, 1H), 7.77-7.67 (m, 5H), 7.47-7.42 (m, 3H), 7.22-7.17 (m, 6H), 5.05 (s, 1H), 3.89 (s, 3H), 3.66 (d, *J* = 14.1 Hz, 1H), 3.49 (d, *J* = 14.1 Hz, 1H), 2.78 (br, 1H); <sup>13</sup>C NMR (CDCl<sub>3</sub>, TMS, 75 MHz) δ 182.5, 181.6, 172.6, 150.5, 146.4, 138.6, 135.6, 133.7, 133.1, 133.0, 132.7, 130.3, 128.3, 128.0, 127.6, 127.1, 126.9, 126.4, 126.3, 126.0, 125.9, 125.4, 75.4, 67.2, 52.9, 41.9; IR (KBr) ν 3382, 3060, 2951, 2360, 1741, 1633, 1593, 1496, 1454, 1434, 1336, 1296, 1244, 1169, 1125, 1045, 860, 818, 770, 731, 703, 668 cm<sup>-1</sup>. HRMS: calcd. for C<sub>31</sub>H<sub>24</sub>NO<sub>4</sub><sup>+</sup>: 474.1700, found. 474.1689. The product was analyzed by HPLC to determine the enantiomeric excess: 97% *ee* (Chiralpak AS-H, *i*-propanol/hexane = 30/70, flow rate 1.0 mL/min, λ = 220 nm); *t<sub>r</sub>* = 12.75 and 28.66 min.

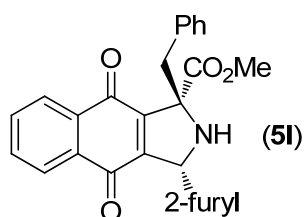

**(1*R*,3*S*)-methyl 1-benzyl-3-(furan-2-yl)-4,9-dioxo-2,3,4,9-tetrahydro-1H-benzo[f]isoindole-1-carboxylate**

The title compound was prepared according to the general procedure as described above in 76% yield. m.p. 155-158 °C; <sup>1</sup>H NMR (CDCl<sub>3</sub>, TMS, 300 MHz) δ 8.18 (d, *J* = 7.2 Hz, 1H), 7.96 (d, *J* = 7.2 Hz, 1H), 7.77-7.71 (m, 2H), 7.17 (s, 5H), 6.28 (m, 1H), 6.21 (m, 1H), 5.13 (s, 1H), 3.78 (s, 3H), 3.62 (d, *J* = 13.5 Hz, 1H), 3.45 (d, *J* = 13.5

Hz, 1H), 2.79 (br, 1H);  $^{13}\text{C}$  NMR ( $\text{CDCl}_3$ , TMS, 75 MHz)  $\delta$  182.2, 181.6, 172.8, 152.9, 148.3, 146.7, 142.2, 135.5, 133.9, 132.6, 130.5, 128.1, 127.0, 126.6, 126.3, 110.6, 107.5, 75.7, 59.4, 42.0; IR (KBr)  $\nu$  3374, 2926, 1736, 1637, 1594, 1436, 1337, 1293, 1270, 1148, 1046, 770, 732, 702  $\text{cm}^{-1}$ . HRMS: calcd. for  $\text{C}_{25}\text{H}_{20}\text{NO}_5^+$ : 414.1336, found. 414.1330. The product was analyzed by HPLC to determine the enantiomeric excess: 94% *ee* (Chiralpak AS-H, *i*-propanol/hexane = 30/70, flow rate 1.0 mL/min,  $\lambda$  = 220 nm);  $t_r$  = 11.18 and 14.19 min.

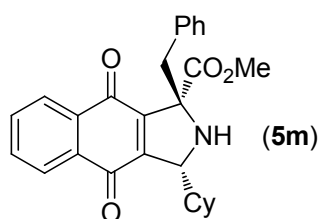

**(1*R*,3*R*)-methyl 1-benzyl-3-cyclohexyl-4,9-dioxo-2,3,4,9-tetrahydro-1H-benzo[f]isoindole-1-carboxylate**

The title compound was prepared according to the general procedure as described above in 70% yield. m.p. 138-141 °C;  $[\alpha]_D^{25} = +83.7$  (*c* 1.28,  $\text{CHCl}_3$ );  $^1\text{H}$  NMR ( $\text{CDCl}_3$ , TMS, 300 MHz)  $\delta$  8.14 (d,  $J$  = 7.2 Hz, 1H), 8.02 (d,  $J$  = 7.2 Hz, 1H), 7.77-7.73 (m, 2H), 7.14-7.13 (m, 3H), 7.05-7.03 (m, 2H), 3.81 (s, 1H), 3.77 (s, 3H), 3.59 (d,  $J$  = 13.8 Hz, 1H), 3.38 (d,  $J$  = 13.8 Hz, 1H), 2.23 (m, 1H), 1.94 (m, 1H), 1.70 (m, 1H), 1.61 (m, 3H), 1.50-1.47 (m, 1H), 1.23-1.12 (m, 4H);  $^{13}\text{C}$  NMR ( $\text{CDCl}_3$ , TMS, 75 MHz)  $\delta$  182.4, 172.9, 151.1, 146.9, 135.6, 133.7, 133.6, 132.9, 132.7, 130.1, 128.2, 127.0, 126.4, 74.8, 68.5, 52.6, 41.6, 41.0, 30.6, 26.5, 26.2, 26.1, 26.0; IR (KBr)  $\nu$  3358, 2977, 1735, 1594, 1424, 1215, 1047, 878, 773, 669, 626  $\text{cm}^{-1}$ . HRMS: calcd. for  $\text{C}_{27}\text{H}_{28}\text{NO}_4^+$ : 430.2018, found. 430.2012. The product was analyzed by HPLC to determine the enantiomeric excess: 94% *ee* (Chiralcel AS-H, *i*-propanol/hexane = 20/80, flow rate 1.0 mL/min,  $\lambda$  = 220 nm);  $t_r$  = 7.28 and 10.16 min.

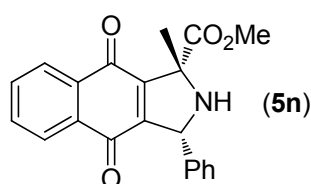



**(1*R*,3*R*)-methyl 1-methyl-4,9-dioxo-3-phenyl-2,3,4,9-tetrahydro-1*H*-benzo[*f*]isoindole-1-carboxylate**

The title compound was prepared according to the general procedure as described above in 82% yield. m.p. 95-98 °C;  $[\alpha]_D^{25} = +31.5$  (*c* 1.20, CHCl<sub>3</sub>); <sup>1</sup>H NMR (CDCl<sub>3</sub>, TMS, 300 MHz) δ 8.11 (d, *J* = 8.4 Hz, 1H), 7.97 (d, *J* = 8.4 Hz, 1H), 7.74-7.70 (m, 2H), 7.44 (d, *J* = 6.9 Hz, 2H), 7.37-7.27 (m, 3H), 5.69 (s, 1H), 3.79 (s, 3H), 2.60 (br, 1H), 1.81 (s, 3H); <sup>13</sup>C NMR (CDCl<sub>3</sub>, TMS, 75 MHz) δ 182.2, 181.8, 172.9, 148.8, 148.4, 141.0, 133.7, 132.8, 128.5, 127.9, 127.6, 126.3, 71.0, 66.5, 52.7, 24.4; IR (KBr) ν 3368, 2951, 1740, 1634, 1593, 1492, 1454, 1372, 1332, 1267, 1171, 1106, 1027, 901, 776, 730, 716, 704, 641, 554 cm<sup>-1</sup>. HRMS: calcd. for C<sub>21</sub>H<sub>18</sub>NO<sub>4</sub><sup>+</sup>: 348.1230, found. 348.1220. The product was analyzed by HPLC to determine the enantiomeric excess: 89% *ee* (Chiralcel OD-H, *i*-propanol/hexane = 20/80, flow rate 1.0 mL/min, λ = 220 nm); *t<sub>r</sub>* = 17.20 and 30.03 min.

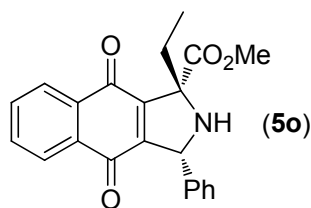

**(1*R*,3*R*)-methyl 1-ethyl-4,9-dioxo-3-phenyl-2,3,4,9-tetrahydro-1*H*-benzo[*f*]isoindole-1-carboxylate**

The title compound was prepared according to the general procedure as described above in 90% yield. m.p. 102-105 °C;  $[\alpha]_D^{25} = +5.5$  (*c* 1.40, CHCl<sub>3</sub>); <sup>1</sup>H NMR (CDCl<sub>3</sub>, TMS, 300 MHz) δ 8.12 (d, *J* = 7.2 Hz, 1H), 7.97 (d, *J* = 7.2 Hz, 1H), 7.74-7.70 (m, 2H), 7.42-7.30 (m, 5H), 5.64 (s, 1H), 3.79 (s, 3H), 2.50-2.70 (br, 1H), 2.35-2.31 (m, 1H), 2.22-2.17 (m, 1H), 0.96-0.91 (t, *J* = 7.2 Hz, 3H); <sup>13</sup>C NMR (CDCl<sub>3</sub>, TMS, 75 MHz) δ 182.0, 181.9, 173.3, 150.3, 146.4, 141.4, 133.7, 132.9, 132.8, 128.6, 128.0, 127.6, 126.4, 126.3, 75.7, 67.3, 52.7, 29.6, 8.0; IR (KBr) ν 3374, 2966, 1736, 1632, 1594, 1492, 1456, 1368, 1334, 1290, 1261, 1170, 1082, 1026, 772, 742, 715, 701 cm<sup>-1</sup>. HRMS: calcd. for C<sub>22</sub>H<sub>20</sub>NO<sub>4</sub><sup>+</sup>: 362.1387, found. 362.1382. The product was analyzed by HPLC to determine the enantiomeric excess: 94% *ee* (Chiralpak AS-H, *i*-propanol/hexane = 20/80, flow rate 1.0 mL/min, λ = 220 nm); *t<sub>r</sub>* = 17.17 and 33.97

min.

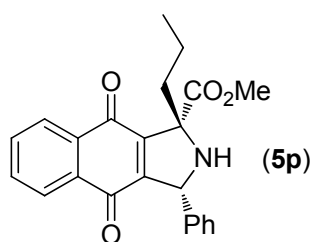

**(1R,3R)-methyl 4,9-dioxo-3-phenyl-1-propyl-2,3,4,9-tetrahydro-1H-benzo[f]  
isoindole-1-carboxylate**

The title compound was prepared according to the general procedure as described above in 77% yield. m.p. 91-94 °C;  $[\alpha]_D^{25} = +6.3$  (*c* 1.20, CHCl<sub>3</sub>); <sup>1</sup>H NMR (CDCl<sub>3</sub>, TMS, 300 MHz) δ 8.11 (d, *J* = 7.2 Hz, 1H), 7.96 (d, *J* = 7.2 Hz, 1H), 7.77-7.67 (m, 2H), 7.41-7.29 (m, 5H), 5.63 (s, 1H), 3.78 (s, 3H), 2.61 (br, 1H), 2.39-2.24 (m, 1H), 2.15-2.05 (m, 1H), 1.52-1.45 (m, 1H), 1.23-1.14 (m, 1H), 0.98-0.93 (t, *J* = 7.2 Hz, 3H); <sup>13</sup>C NMR (CDCl<sub>3</sub>, TMS, 75 MHz) δ 182.0, 181.9, 173.3, 150.0, 146.7, 141.3, 133.7, 132.9, 132.8, 128.6, 128.0, 127.6, 126.4, 126.3, 75.2, 67.3, 52.7, 38.9, 17.1, 14.2; IR (KBr) ν 3375, 3065, 3030, 2958, 2929, 2872, 1736, 1633, 1594, 1493, 1455, 1434, 1368, 1333, 1289, 1249, 1170, 1109, 1044, 1028, 941, 777, 747, 715, 701, 645, 574 cm<sup>-1</sup>. HRMS: calcd. for C<sub>23</sub>H<sub>22</sub>NO<sub>4</sub><sup>+</sup>: 376.1530, found. 376.1525. The product was analyzed by HPLC to determine the enantiomeric excess: 90% *ee* (Chiralpak AS-H, *i*-propanol/hexane = 20/80, flow rate 1.0 mL/min, λ = 220 nm); *t<sub>r</sub>* = 23.21 and 43.83 min.

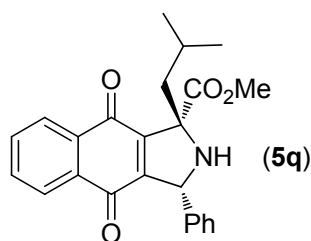

**(1R,3R)-methyl 1-isobutyl-4,9-dioxo-3-phenyl-2,3,4,9-tetrahydro-1H-benzo[f]  
isoindole-1-carboxylate**

The title compound was prepared according to the general procedure as described above in 74% yield. m.p. 112-115 °C;  $[\alpha]_D^{25} = +26.5$  (*c* 1.56, CHCl<sub>3</sub>); <sup>1</sup>H NMR (CDCl<sub>3</sub>, TMS, 300 MHz) δ 8.12 (d, *J* = 9.0 Hz, 1H), 7.97 (d, *J* = 9.0 Hz, 1H),

7.77-7.70 (m, 2H), 7.41-7.29 (m, 5H), 5.65 (s, 1H), 3.77 (s, 3H), 2.61 (br, 1H), 2.25-2.11 (m, 2H), 1.78-1.74 (m, 1H), 1.02 (d,  $J = 6.6$  Hz, 3H), 0.86 (d,  $J = 6.6$  Hz, 3H);  $^{13}\text{C}$  NMR ( $\text{CDCl}_3$ , TMS, 75 MHz)  $\delta$  182.1, 173.5, 149.9, 147.2, 141.3, 133.8, 133.7, 133.0, 132.8, 128.6, 128.0, 127.6, 126.5, 126.3, 75.3, 67.0, 52.7, 44.8, 24.5, 24.4, 24.3; IR (KBr)  $\nu$  3380, 2954, 1735, 1668, 1631, 1594, 1492, 1455, 1367, 1329, 1220, 1169, 1125, 1029, 715, 701  $\text{cm}^{-1}$ . HRMS: calcd. for  $\text{C}_{24}\text{H}_{24}\text{NO}_4^+$ : 390.1700, found. 390.1703. The product was analyzed by HPLC to determine the enantiomeric excess: 93% *ee* (Chiralpak AS-H, *i*-propanol/hexane = 30/70, flow rate 1.0 mL/min,  $\lambda$  = 220 nm);  $t_r$  = 7.77 and 26.04 min.

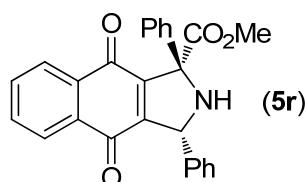

**(1R,3R)-methyl 4,9-dioxo-1,3-diphenyl-2,3,4,9-tetrahydro-1H-benzo[f]isoindole-1-carboxylate**

The title compound was prepared according to the general procedure as described above in 86% yield. m.p. 120-123 °C;  $[\alpha]_D^{25} = +48.6$  ( $c$  0.42,  $\text{CHCl}_3$ );  $^1\text{H}$  NMR ( $\text{CDCl}_3$ , TMS, 400 MHz)  $\delta$  8.03 (d,  $J = 7.2$  Hz, 1H), 7.92 (d,  $J = 7.2$  Hz, 1H), 7.67-7.64 (m, 4H), 7.45 (d,  $J = 7.6$  Hz, 2H), 7.40-7.24 (m, 6H), 5.84 (s, 1H), 3.85 (s, 3H);  $^{13}\text{C}$  NMR ( $\text{CDCl}_3$ , TMS, 100 MHz)  $\delta$  182.3, 182.2, 172.4, 148.7, 147.5, 140.9, 140.2, 133.8, 133.6, 132.9, 132.6, 129.7, 128.7, 128.2, 128.0, 127.6, 127.2, 126.5, 126.1, 76.6, 67.3, 53.0; IR (KBr)  $\nu$  3384, 3065, 3030, 2958, 1736, 1669, 1593, 1457, 1219, 1070, 754, 698  $\text{cm}^{-1}$ . HRMS: calcd. for  $\text{C}_{26}\text{H}_{20}\text{NO}_4^+$ : 410.1387, found. 410.1377. The product was analyzed by HPLC to determine the enantiomeric excess: 93% *ee* (Chiralpak AD-H, *i*-propanol/hexane = 15/85, flow rate 1.0 mL/min,  $\lambda$  = 220 nm);  $t_r$  = 31.13 and 34.41 min.

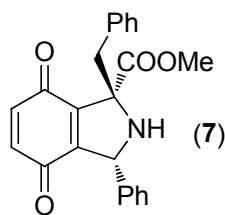

**(1*R*,3*R*)-methyl 1-benzyl-4,7-dioxo-3-phenyl-2,3,4,7-tetrahydro-1*H*-isoindole-1-carboxylate**

The title compound was prepared according to the general procedure as described above in 82% yield.  $[\alpha]_D^{25} = +53.7$  ( $c$  0.48,  $\text{CHCl}_3$ );  $^1\text{H}$  NMR ( $\text{CDCl}_3$ , TMS, 300 MHz)  $\delta$  7.26 (m, 3H), 7.12 (m, 2H), 6.71 (d,  $J = 10.2$  Hz, 1H), 6.53 (d,  $J = 10.2$  Hz, 1H), 4.80 (s, 1H), 3.83 (s, 3H), 3.49 (d,  $J = 14.1$  Hz, 1H), 3.37 (d,  $J = 14.1$  Hz, 1H), 2.66 (br, 1H);  $^{13}\text{C}$  NMR ( $\text{CDCl}_3$ , TMS, 75 MHz)  $\delta$  184.7, 183.8, 172.5, 148.1, 143.9, 140.8, 136.8, 136.6, 135.4, 130.2, 128.4, 128.2, 127.9, 127.5, 127.1, 75.3, 66.7, 52.9, 41.9; IR (KBr)  $\nu$  2956, 1736, 1669, 1593, 1452, 1215, 1047, 669,  $\text{cm}^{-1}$ . HRMS: calcd. for  $\text{C}_{23}\text{H}_{22}\text{NO}_4^+$ : 376.1549, found. 376.1530. The product was analyzed by HPLC to determine the enantiomeric excess: 86% *ee* (Chiralpak AS-H, *i*-propanol/hexane = 20/80, flow rate 1.0 mL/min,  $\lambda = 220$  nm);  $t_r = 14.89$  and 30.87 min.

**IV. The Absolute Configuration Determination of (1*R*,3*R*)-5b**

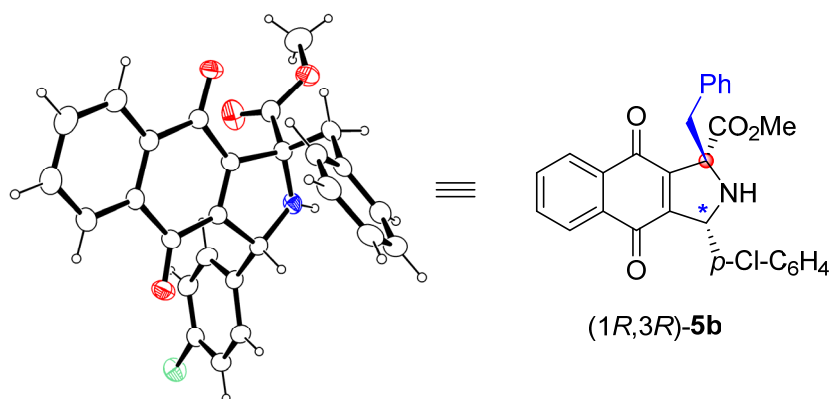

**Figure 1.** X-ray structure of (1*R*,3*R*)-5b.

Crystal data for (1*R*,3*R*)-5b:  $\text{C}_{27}\text{H}_{22}\text{ClNO}_4$ ,  $M_r = 459.91$ ,  $T = 293$  K, tetragonal, space group  $P4(3)$ ,  $a = 12.7827(8)$ ,  $b = 12.7827(8)$ ,  $c = 13.7419(18)$  Å,  $V = 2245.4(4)$  Å<sup>3</sup>,  $Z = 4$ , 3391 unique reflections, final  $R_1 = 0.0320$  and  $wR_2 = 0.0806$  for 4129 observed [ $I > 2\sigma(I)$ ] reflections, Flack  $\chi = -0.04(6)$ . CCDC 904693 contains the

supplementary crystallographic data for this paper. These data can be obtained free of charge via [www.ccdc.cam.ac.uk/conts/retrieving.html](http://www.ccdc.cam.ac.uk/conts/retrieving.html) (or from the Cambridge Crystallographic Data Centre, 12, Union Road, Cambridge CB21EZ, UK; fax: (+44) 1223-336-033; or [deposit@ccdc.cam.ac.uk](mailto:deposit@ccdc.cam.ac.uk)).

## V. Proposed Relative Configuration of the Labile Intermediate in This One-Pot Sequential Catalytic Asymmetric 1,3-DC/Oxidation

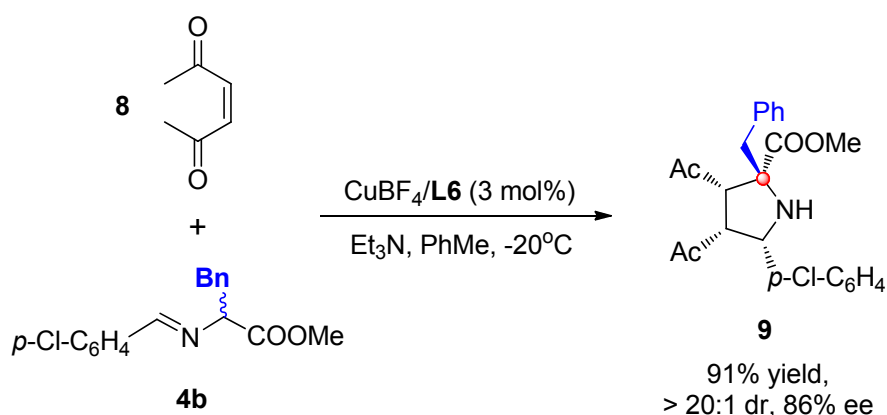

To further investigate the relative configuration of the labile intermediate of this one-pot sequential catalytic asymmetric 1,3-DC/oxidation reaction, (Z)-hex-3-ene-2,5-dione **8** was employed as the dipolarophile and **4b** was employed as imino ester to study the stereochemistry of the 1,3-dipolar cycloaddition under the optimized reaction condition. As expected, the normal 1,3-DC adduct **9** was obtained in 91% yield with excellent diastereoselectivity and 86% *ee* (Scheme 1), and the relative configuration of racemic adduct **9** was determined unambiguously to be *endo* by single X-ray crystallographic analysis (Figure 2). Hence, the relative configuration of the labile intermediate in this one-pot sequential 1,3-DC/oxidation reaction were tentatively proposed to be *endo* on the basis of these results.

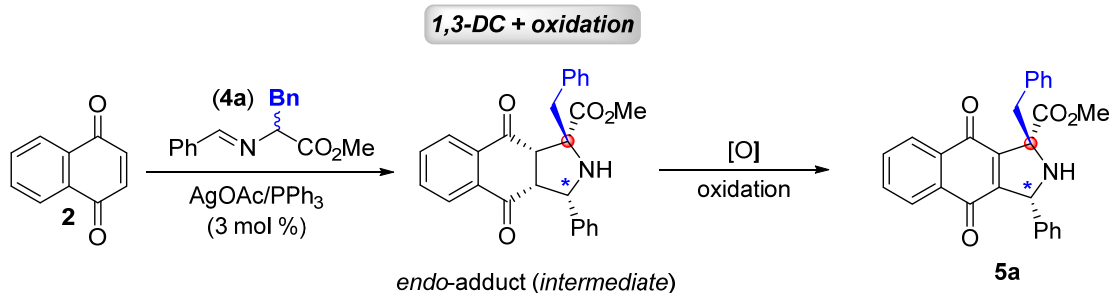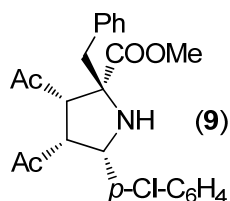

**(2R,3S,4R,5S)-methyl 3,4-diacetyl-2-benzyl-5-(4-chlorophenyl)pyrrolidine-2-carboxylate**

Under argon atmosphere, (*S,R<sub>p</sub>*)-PPFOMe (3.1 mg, 0.0072 mmol) and Cu(CH<sub>3</sub>CN)<sub>4</sub>BF<sub>4</sub> (1.9 mg, 0.006 mmol) were dissolved in toluene (2mL), and stirred at room temperature for about 1 h. Then, imine substrate **4b** (78.3 mg, 0.26 mmol), and (*Z*)-hex-3-ene-2,5-dione (22.4 mg, 0.2 mmol) were added sequentially, after that the mixture was dropped to -20 °C, TEA (3 mg, 0.03 mmol) was added. Once starting material was consumed (monitored by TLC), the residue was purified by column chromatography to give **9** in 91% yield, which was then directly analyzed by chiral HPLC to determine the enantiomeric excess. <sup>1</sup>H NMR (CDCl<sub>3</sub>, TMS, 300 MHz) δ 7.38-7.26 (m, 7H), 7.17 (d, *J* = 8.4 Hz, 2H), 4.16 (d, *J* = 6.0 Hz, 1H), 3.75 (s, 3H), 3.43-3.37 (m, 2H), 3.33 (d, *J* = 13.5 Hz, 1H), 3.15 (d, *J* = 13.5 Hz, 1H), 2.48 (s, 3H), 1.66 (s, 3H); <sup>13</sup>C NMR (CDCl<sub>3</sub>, TMS, 75 MHz) δ 208.4, 205.2, 173.8, 135.9, 135.7, 133.7, 130.5, 128.7, 128.4, 128.3, 127.3, 73.4, 64.6, 62.6, 59.1, 52.4, 45.4, 32.3, 31.3; HRMS: calcd. for C<sub>23</sub>H<sub>25</sub>ClNO<sub>4</sub><sup>+</sup>: 414.1467, found. 414.1446. The product was analyzed by HPLC to determine the enantiomeric excess: 86% *ee* (Chiralpak AD-H, *i*-propanol/hexane = 20/80, flow rate 1.0 mL/min, λ = 220 nm); t<sub>r</sub> = 8.16 and 10.99 min.

## VI. The Relative Configuration Determination of Racemic *endo*-9

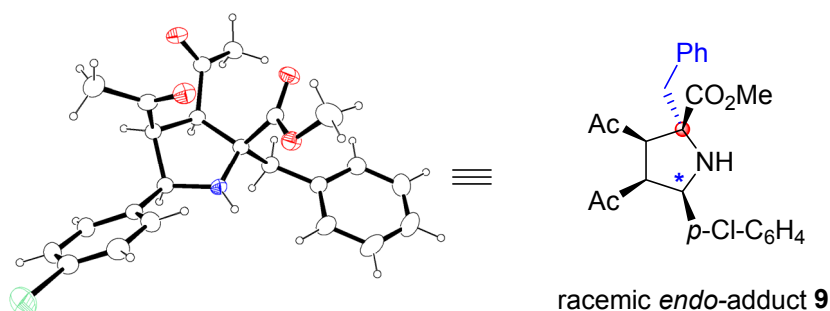

**Figure 2.** X-ray structure of racemic *endo*-9.

Crystal data for racemic *endo*-adduct **9**:  $C_{23}H_{24}ClNO_4$ ,  $M_r = 413.88$ ,  $T = 293$  K, Monoclinic, space group  $P2(1)/c$ ,  $a = 8.9427(14)$ ,  $b = 24.682(4)$ ,  $c = 9.8606(16)$  Å,  $V = 2156.1(6)$  Å<sup>3</sup>,  $Z = 4$ , 3082 unique reflections, final  $R_1 = 0.0450$  and  $wR_2 = 0.1077$  for 4233 observed [ $I > 2\sigma(I)$ ] reflections. CCDC 904694 contains the supplementary crystallographic data for this paper. These data can be obtained free of charge via [www.ccdc.cam.ac.uk/conts/retrieving.html](http://www.ccdc.cam.ac.uk/conts/retrieving.html) (or from the Cambridge Crystallographic Data Centre, 12, Union Road, Cambridge CB21EZ, UK; fax: (+44) 1223-336-033; or [deposit@ccdc.cam.ac.uk](mailto:deposit@ccdc.cam.ac.uk)).

## VII. References

1. Hayashi, T; Fukushima, T, M; Kagotani, M; Nagashima, N; Hamada, Y; Matsumoto, A; Kawakami, S; Konishi, M; Yamamoto, K; Kumada, M. *Bull. Chem. Soc. Jpn.*, **1980**, 53, 1138.
2. CCDC 904693 (**5b**) and CCDC 904694 (**9**) contain the supplementary crystallographic data for this paper. These data can be obtained free of charge via [www.ccdc.cam.ac.uk/conts/retrieving.html](http://www.ccdc.cam.ac.uk/conts/retrieving.html) (or from the Cambridge Crystallographic Data Centre, 12, Union Road, Cambridge CB21EZ, UK; fax: (+44) 1223-336-033; or [deposit@ccdc.cam.ac.uk](mailto:deposit@ccdc.cam.ac.uk)).

# VIII. $^1\text{H}$ NMR and $^{13}\text{C}$ NMR Spectra

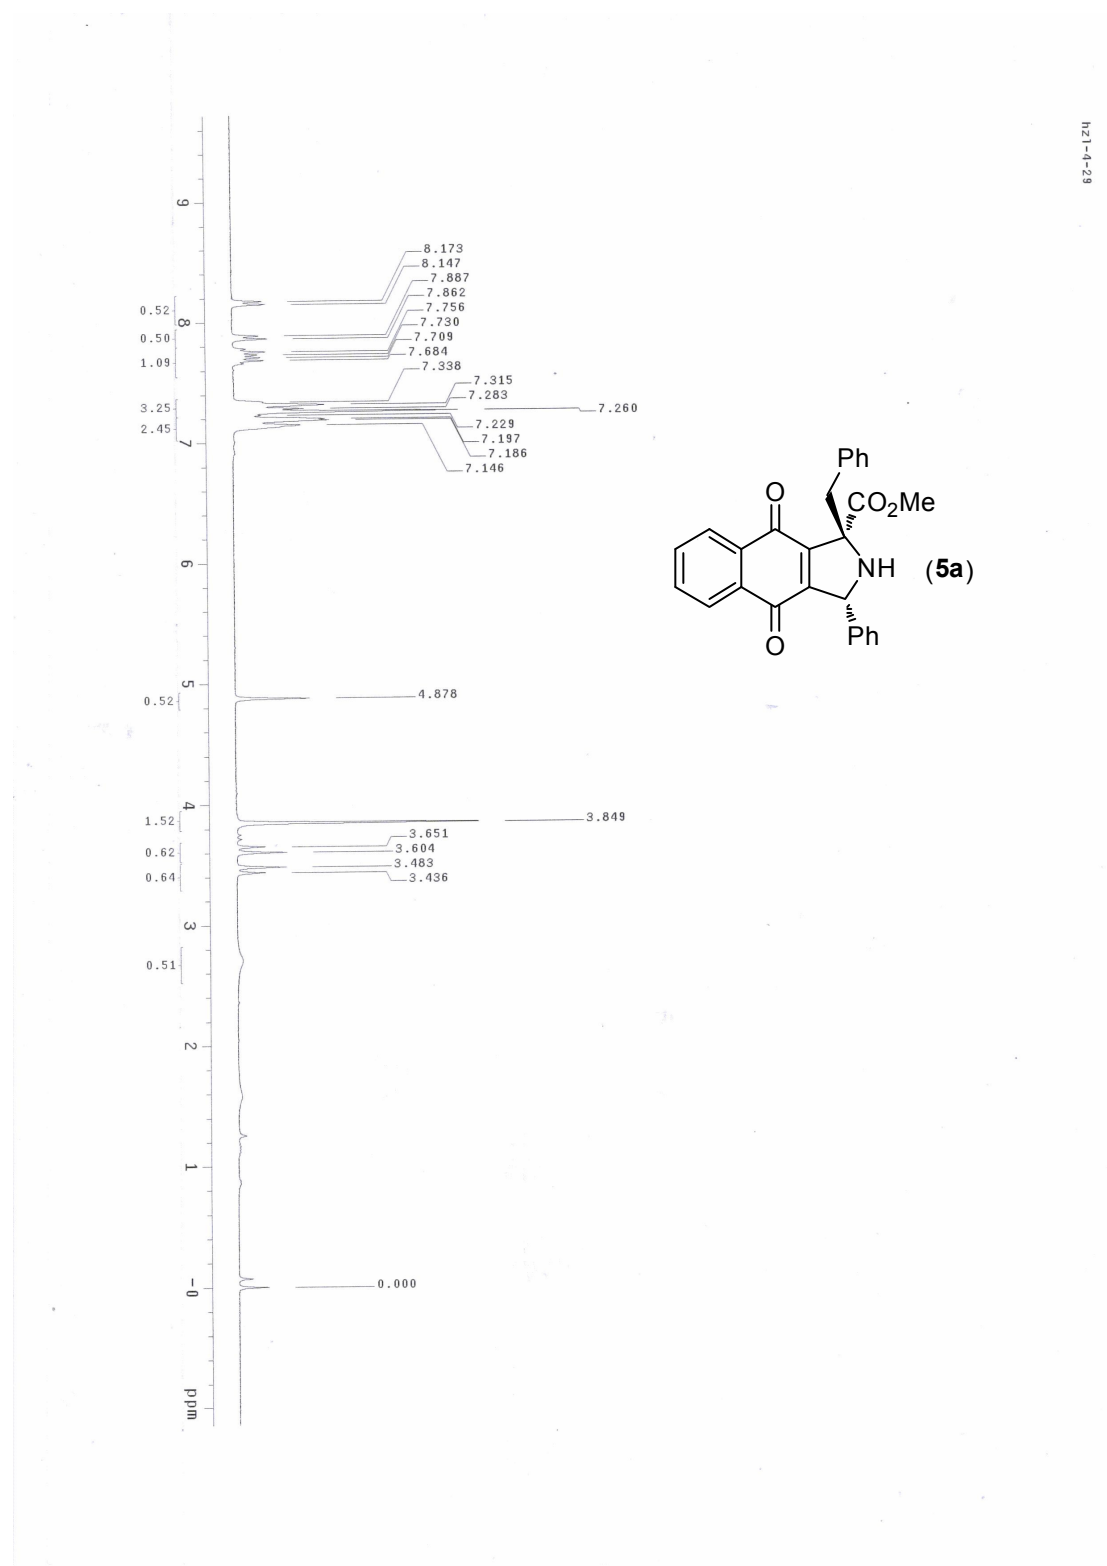



C13H21-4-29

Solvent: CDCl<sub>3</sub>  
Ambient temperature  
Mercury-300BB "mercury300"

Relax. delay 1.000 sec

Acq. 128.0 deg/sec

Acq. 128.0 deg/sec

Width 17699.1 Hz

200 Repetitions

OBSERVE C13, 75.4553150 MHz

Power 40 dB, 500.0615362 MHz

Continuously on

WALTZ-16 modulated

DATA PROCESSING

FT size 32768

Total time 2 hr, 24 min, 23 sec

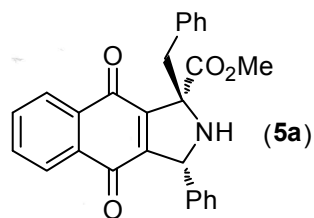

<sup>13</sup>C NMR (CDCl<sub>3</sub>, TMS, 75 MHz)

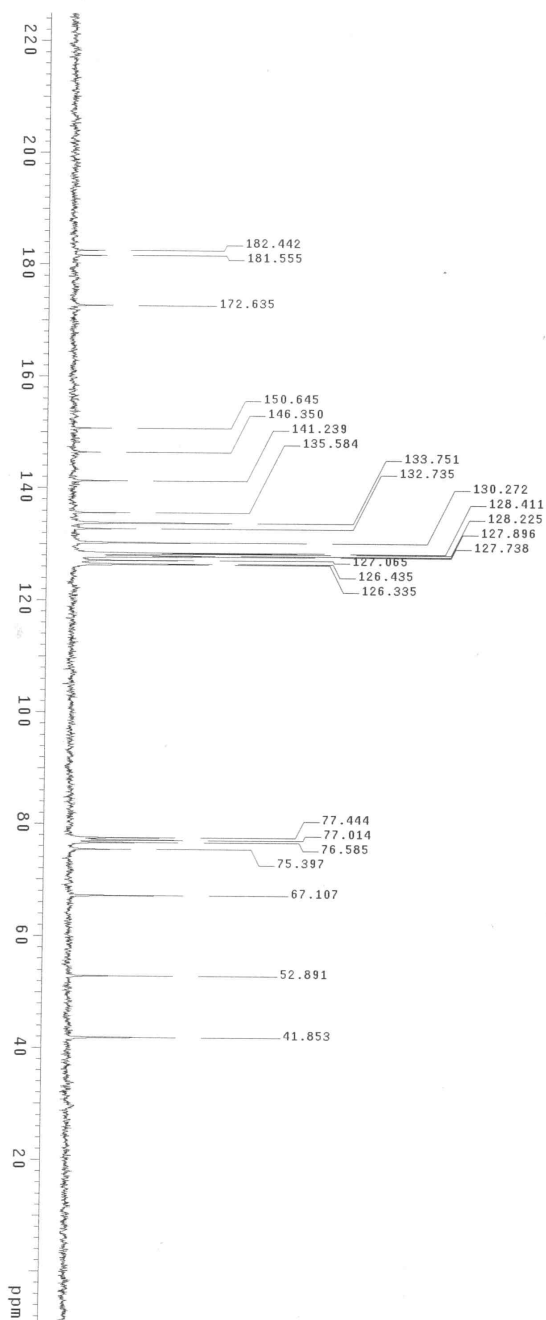

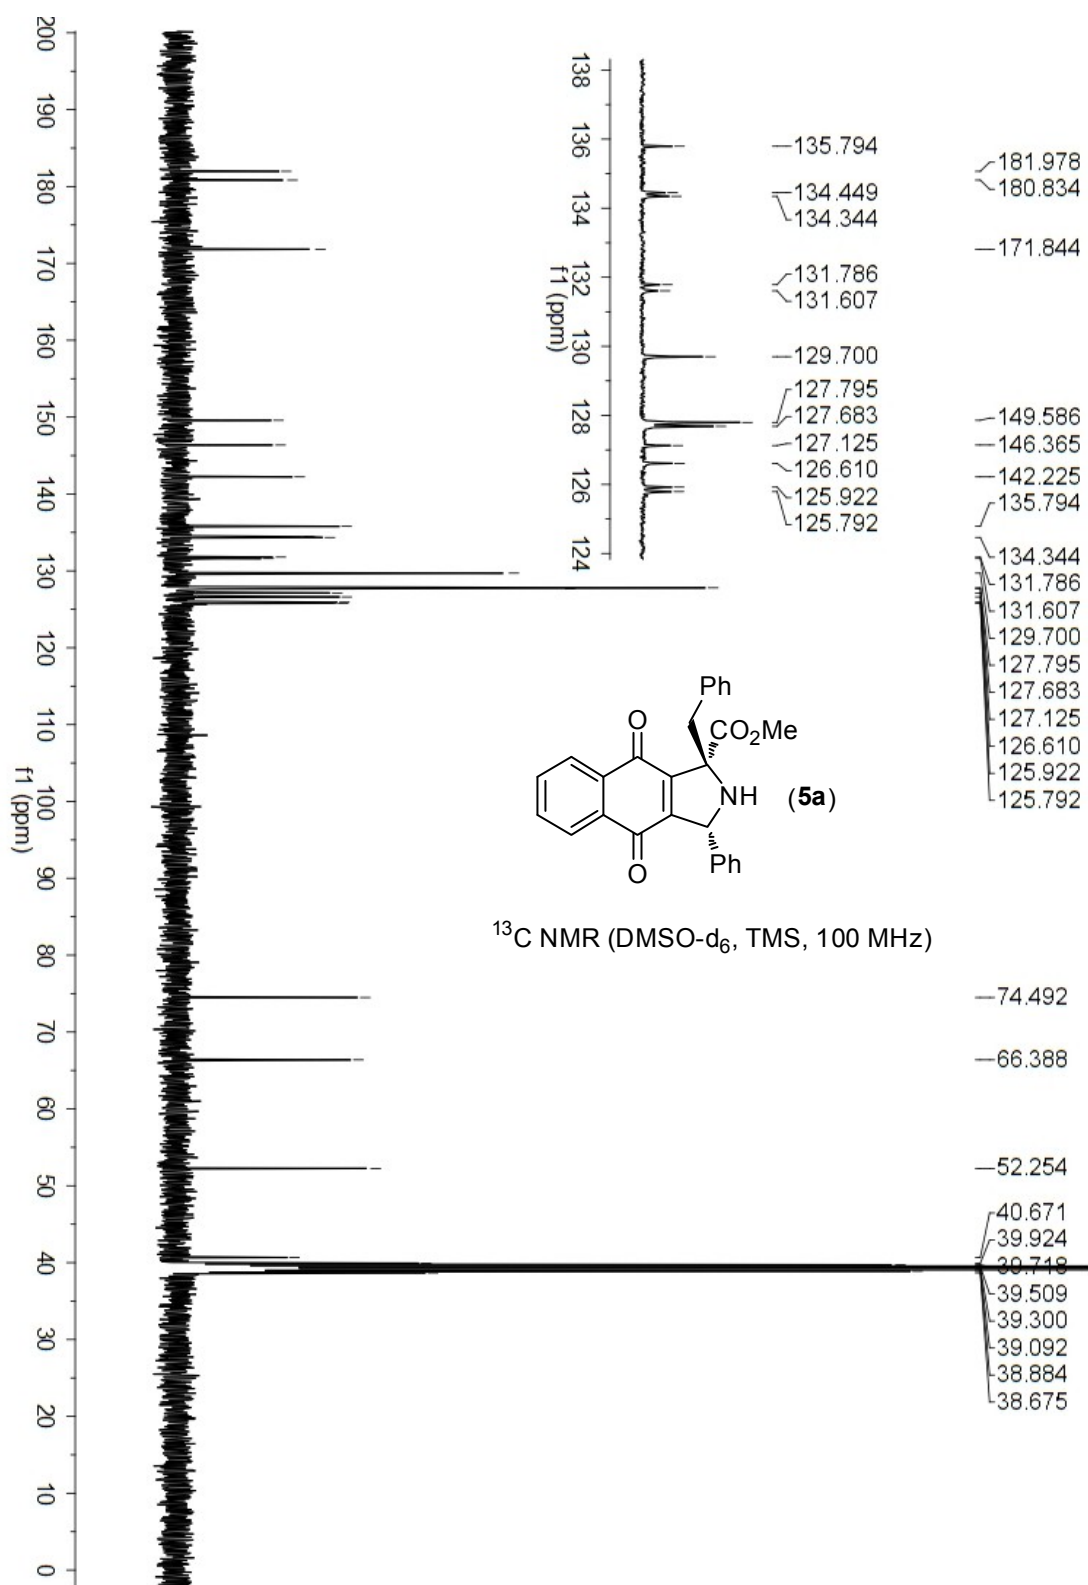

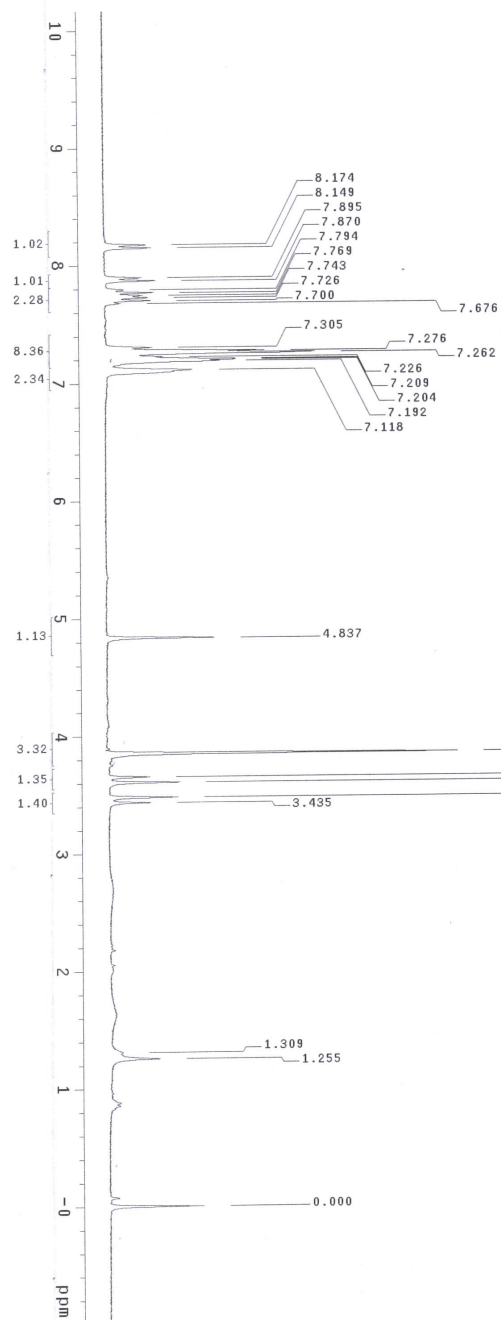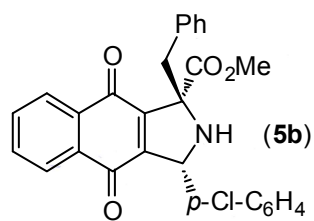

0172-b-120

Solvent: CDCl<sub>3</sub>  
 Acquisition: 13C NMR  
 Mercury-3008B "mercury300"  
 Relax. delay 1.000 sec  
 Pulse 28.0 degrees  
 Acq. time 0.500 sec  
 Shift 125.763 MHz  
 128 Repetitions  
 OBSERVE C13, 75.453118 MHz  
 DECOUPLE H1, 300.0815382 MHz  
 Power 40.0 dB  
 Continuity on  
 WAITZ-16 modulated  
 DATA PROCESSING  
 Line broadening 4.0 Hz  
 F2 size 32768  
 Total time 2 hr, 24 min, 23 sec

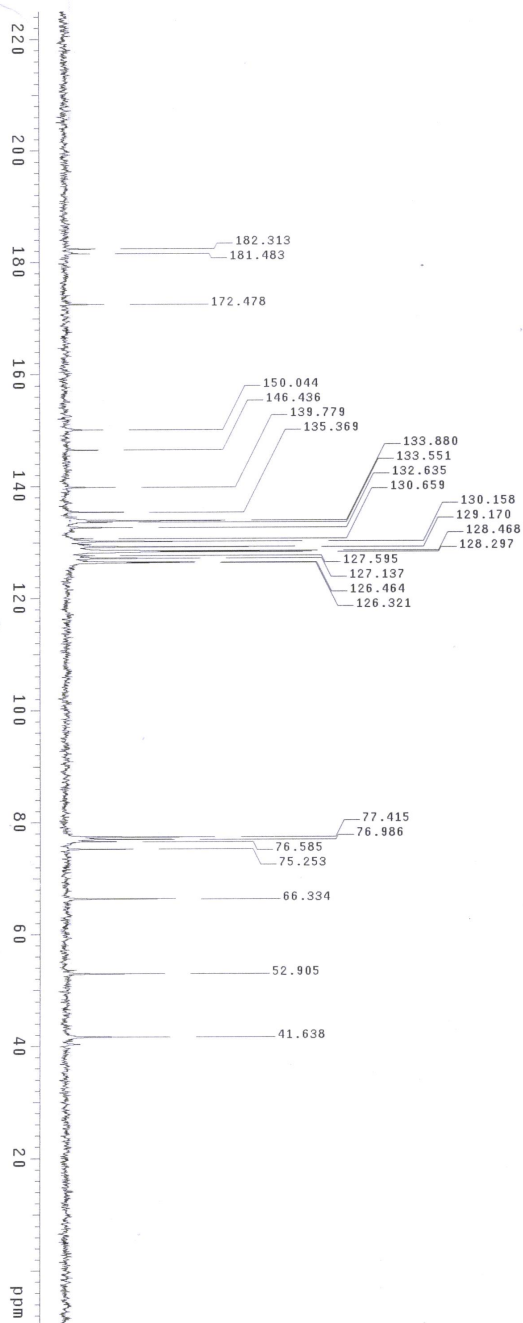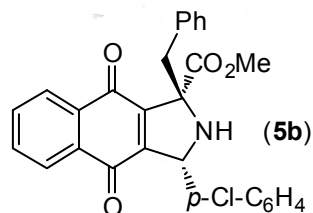

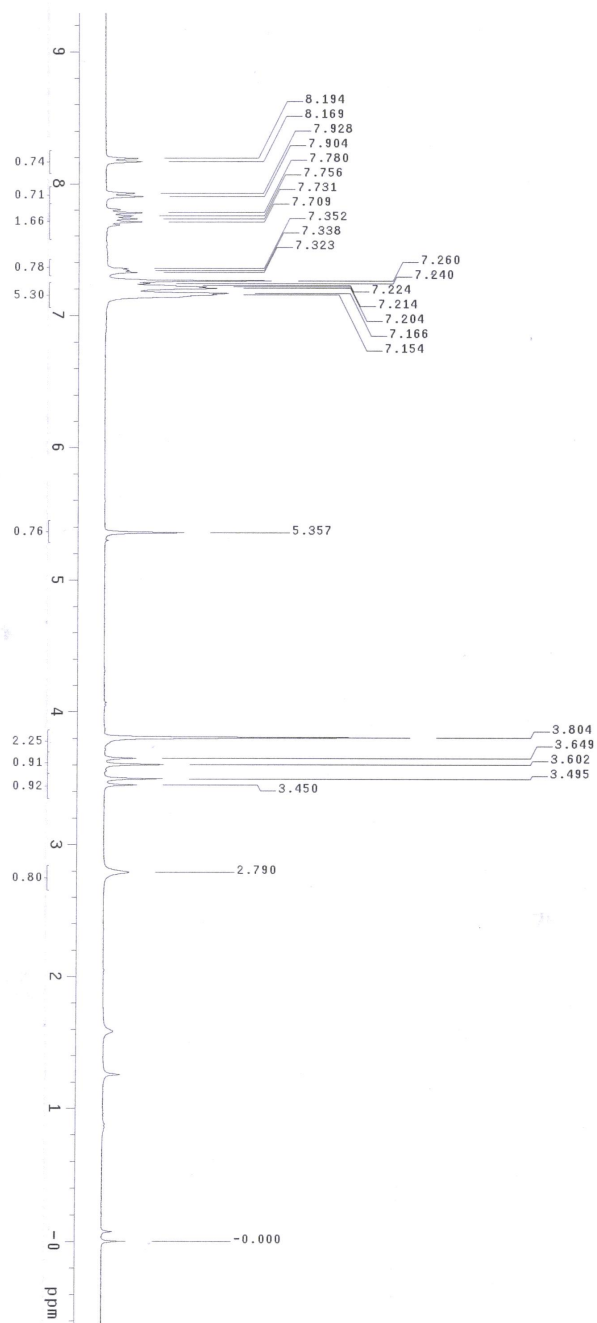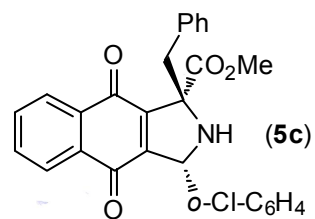

Solvent: CDCl<sub>3</sub>  
 Acquisition temperature: 29.9 °C  
 Mercury-500MHz  
 Relax. delay: 1.000 sec  
 Pulse: 29.0 degrees  
 Acq. time: 0.500 sec  
 Nuclei: 13C  
 144 repetitions  
 OBSERVE: C13, 75.4552934 MHz  
 DECOUPLE: H1, 300.0815382 MHz  
 13C, 75.4552934 MHz  
 WALTZ-16 modulated  
 DATA PROCESSING  
 Line broadening 4.0 Hz  
 F2 size 228  
 Total time 2 hr, 24 min, 23 sec

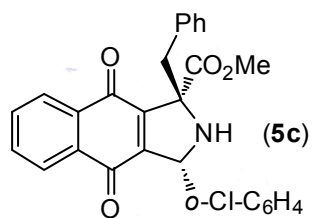

<sup>13</sup>C NMR (CDCl<sub>3</sub>, TMS, 75 MHz)

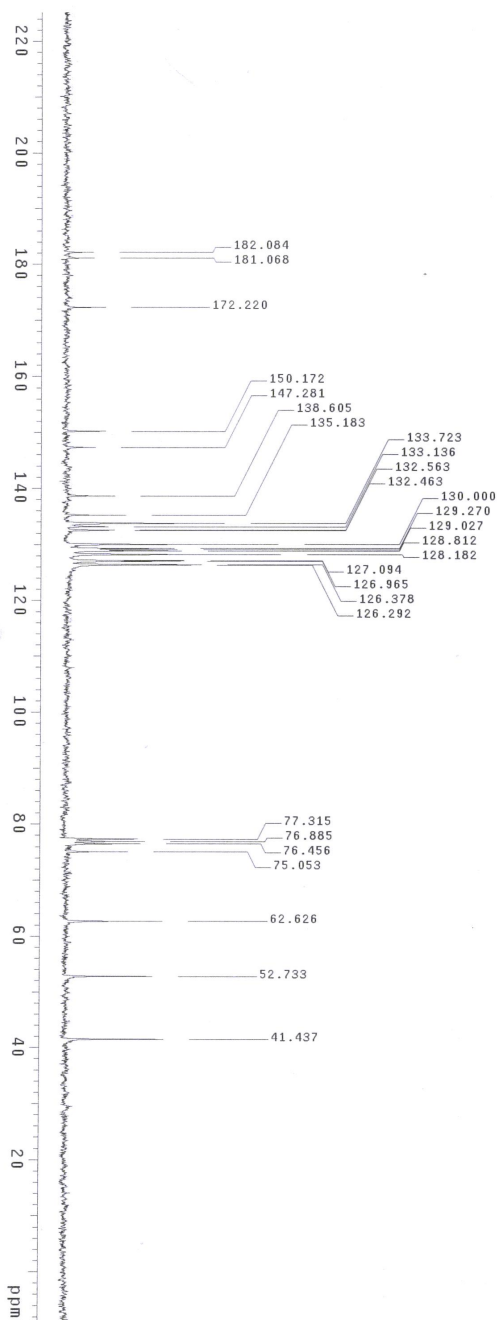

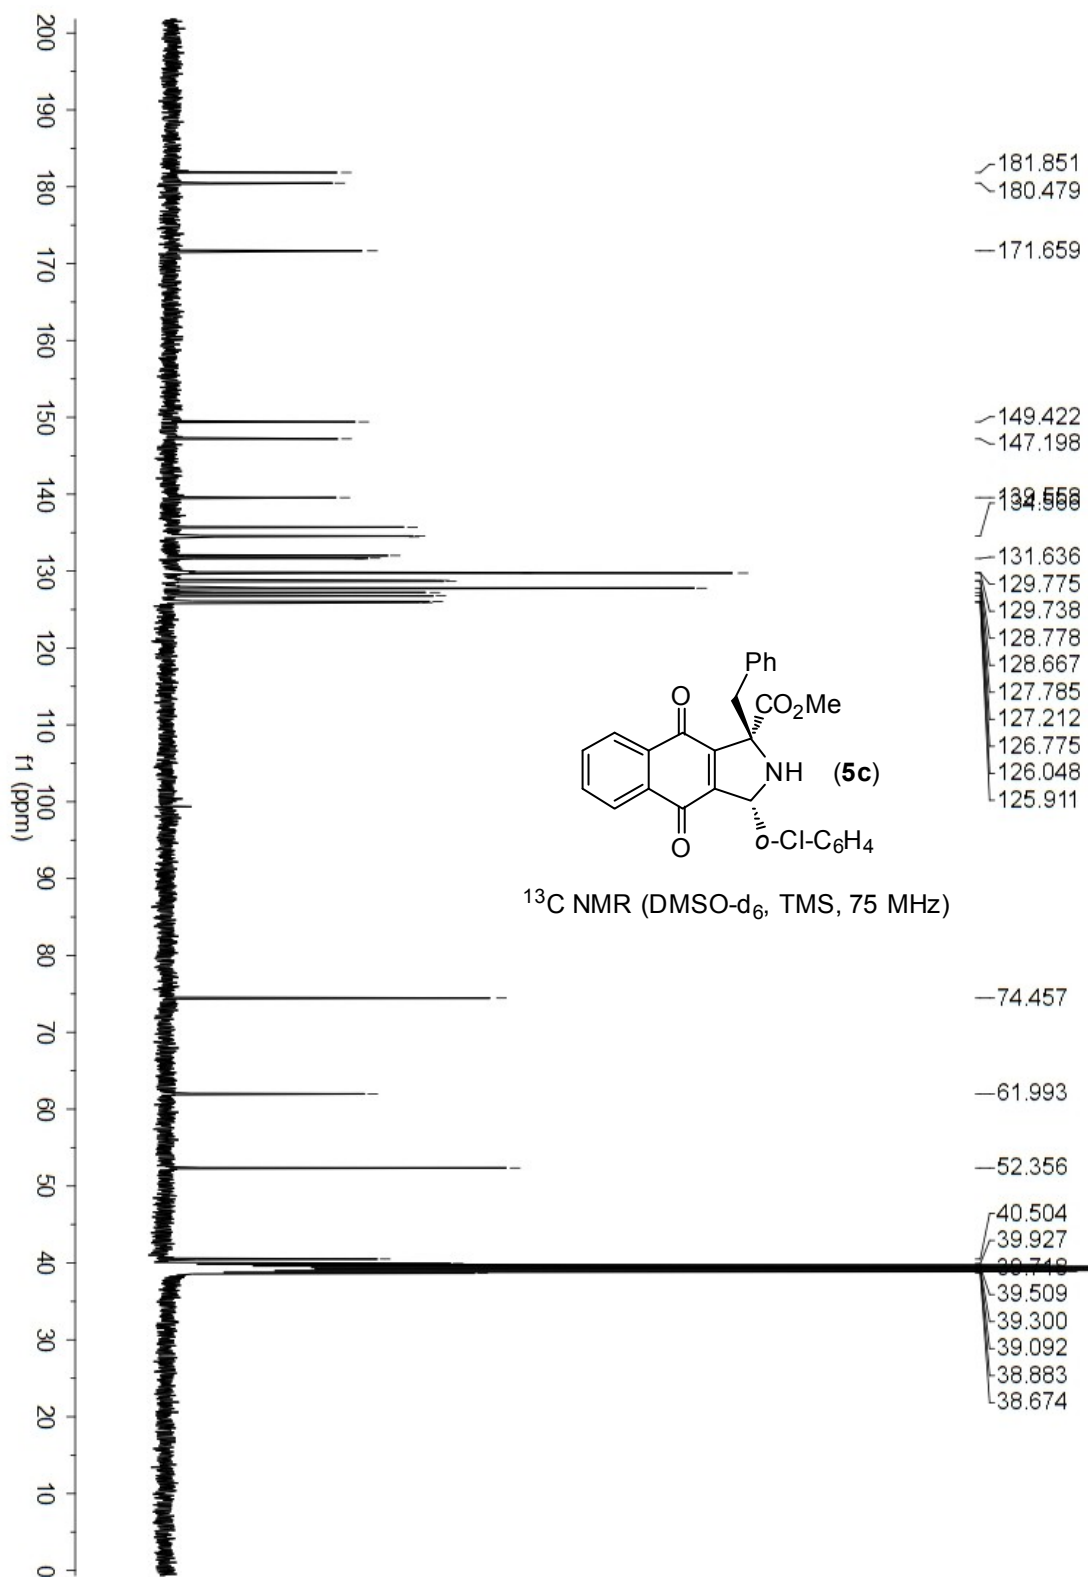

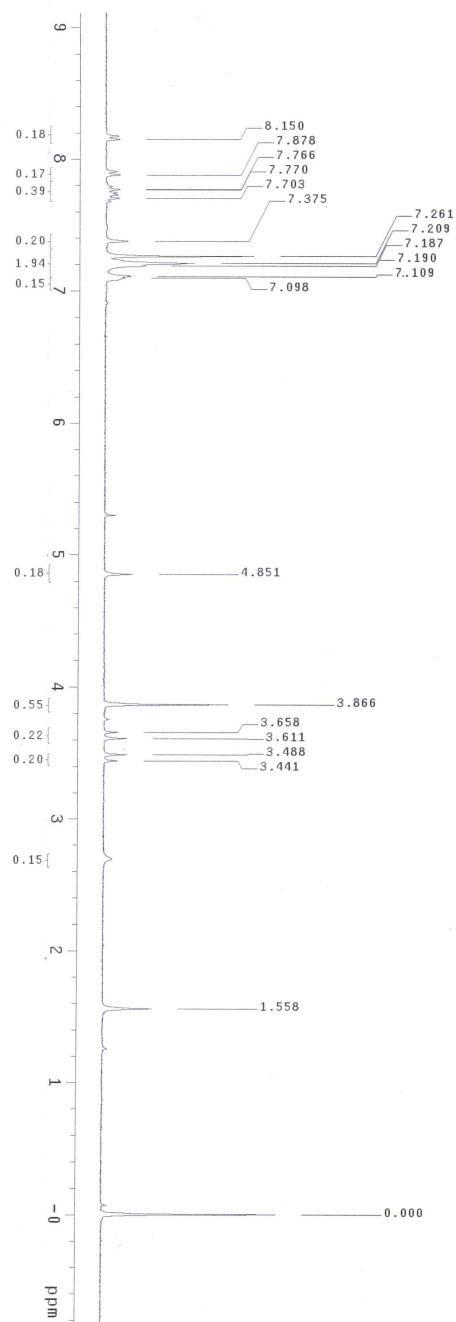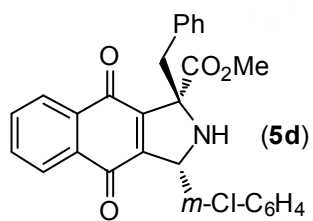



Solvent: CDCl<sub>3</sub>  
 Acquisition Date: 11/11/2008  
 Mercury-300BB "mercury300"  
 Relax. delay: 1.000 sec  
 Pulse: 28.0 degrees  
 Acq. time: 0.500 sec  
 Observed: 126.913 MHz  
 208 F<sub>2</sub> pulses  
 OBSERVE: C13, 75.4553247 MHz  
 DECOUPLE: H1, 300.0815382 MHz  
 Power: 40 dB  
 Presat: 100% on  
 WALTZ-16 modulated  
 DATA PROCESSING  
 Line broadening: 4.0 Hz  
 FT size: 32768  
 Total time: 2 hr, 24 min, 23 sec

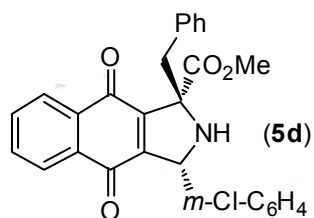

<sup>13</sup>C NMR (CDCl<sub>3</sub>, TMS, 75 MHz)

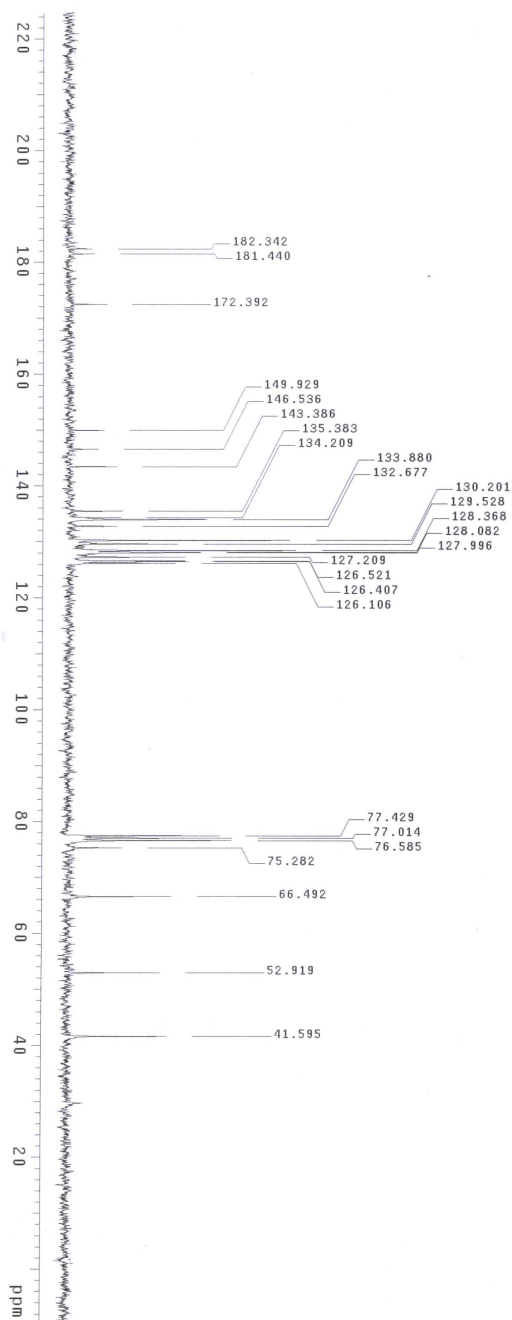

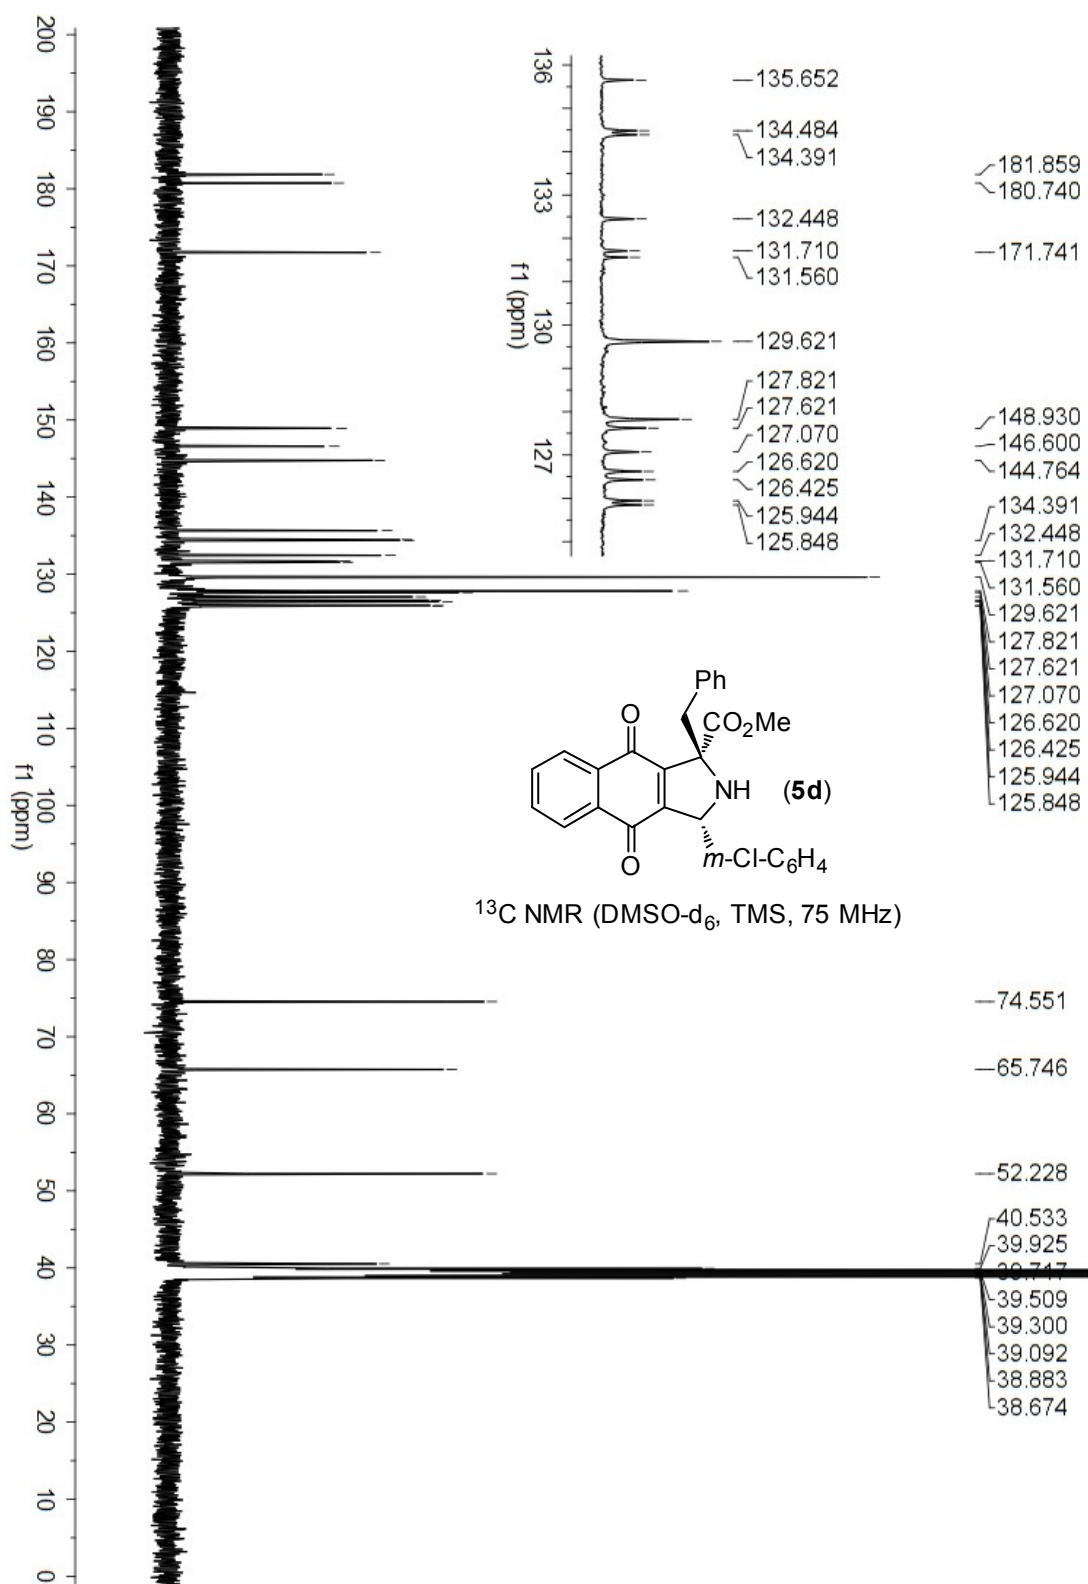

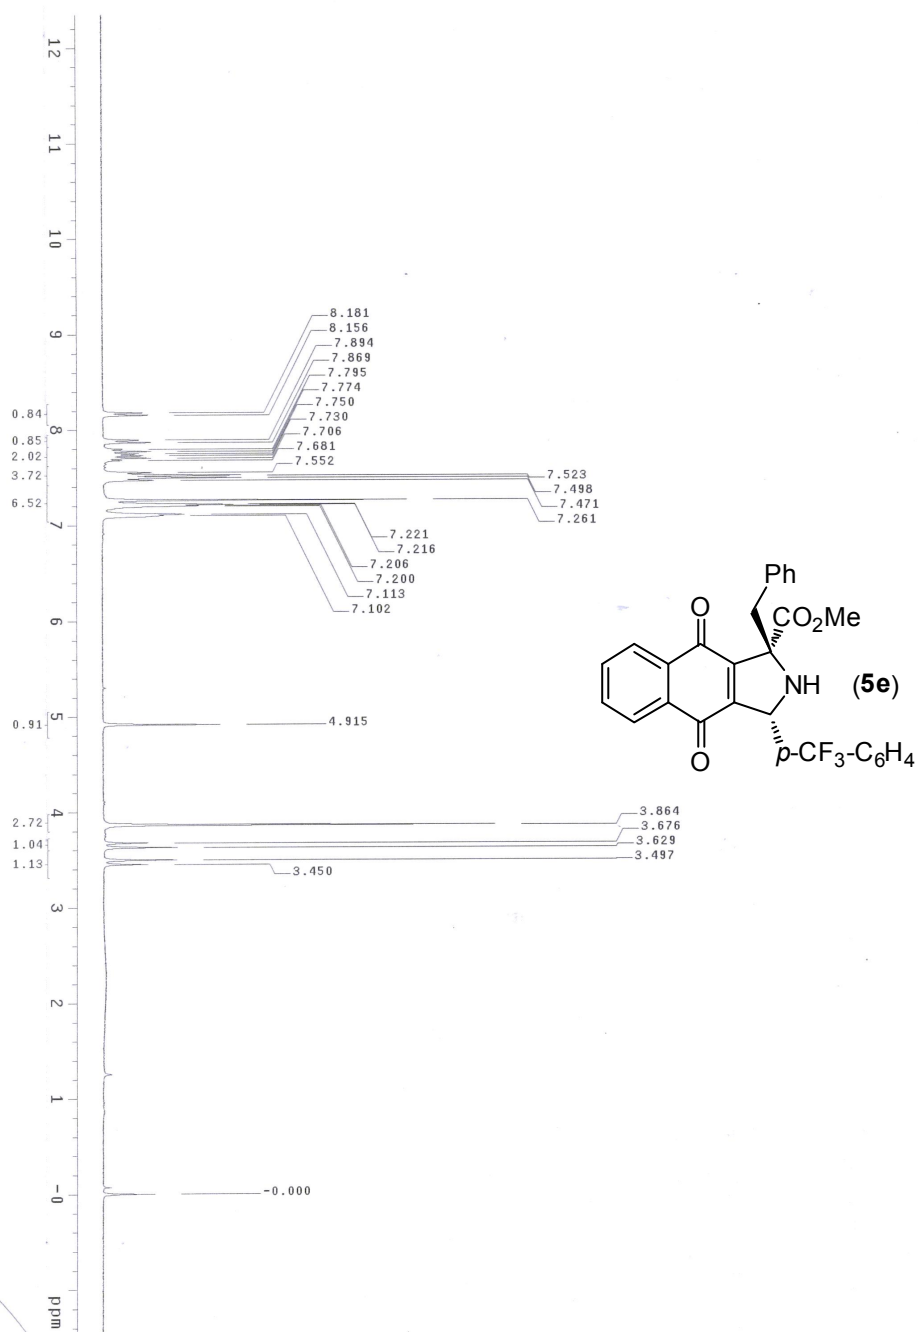

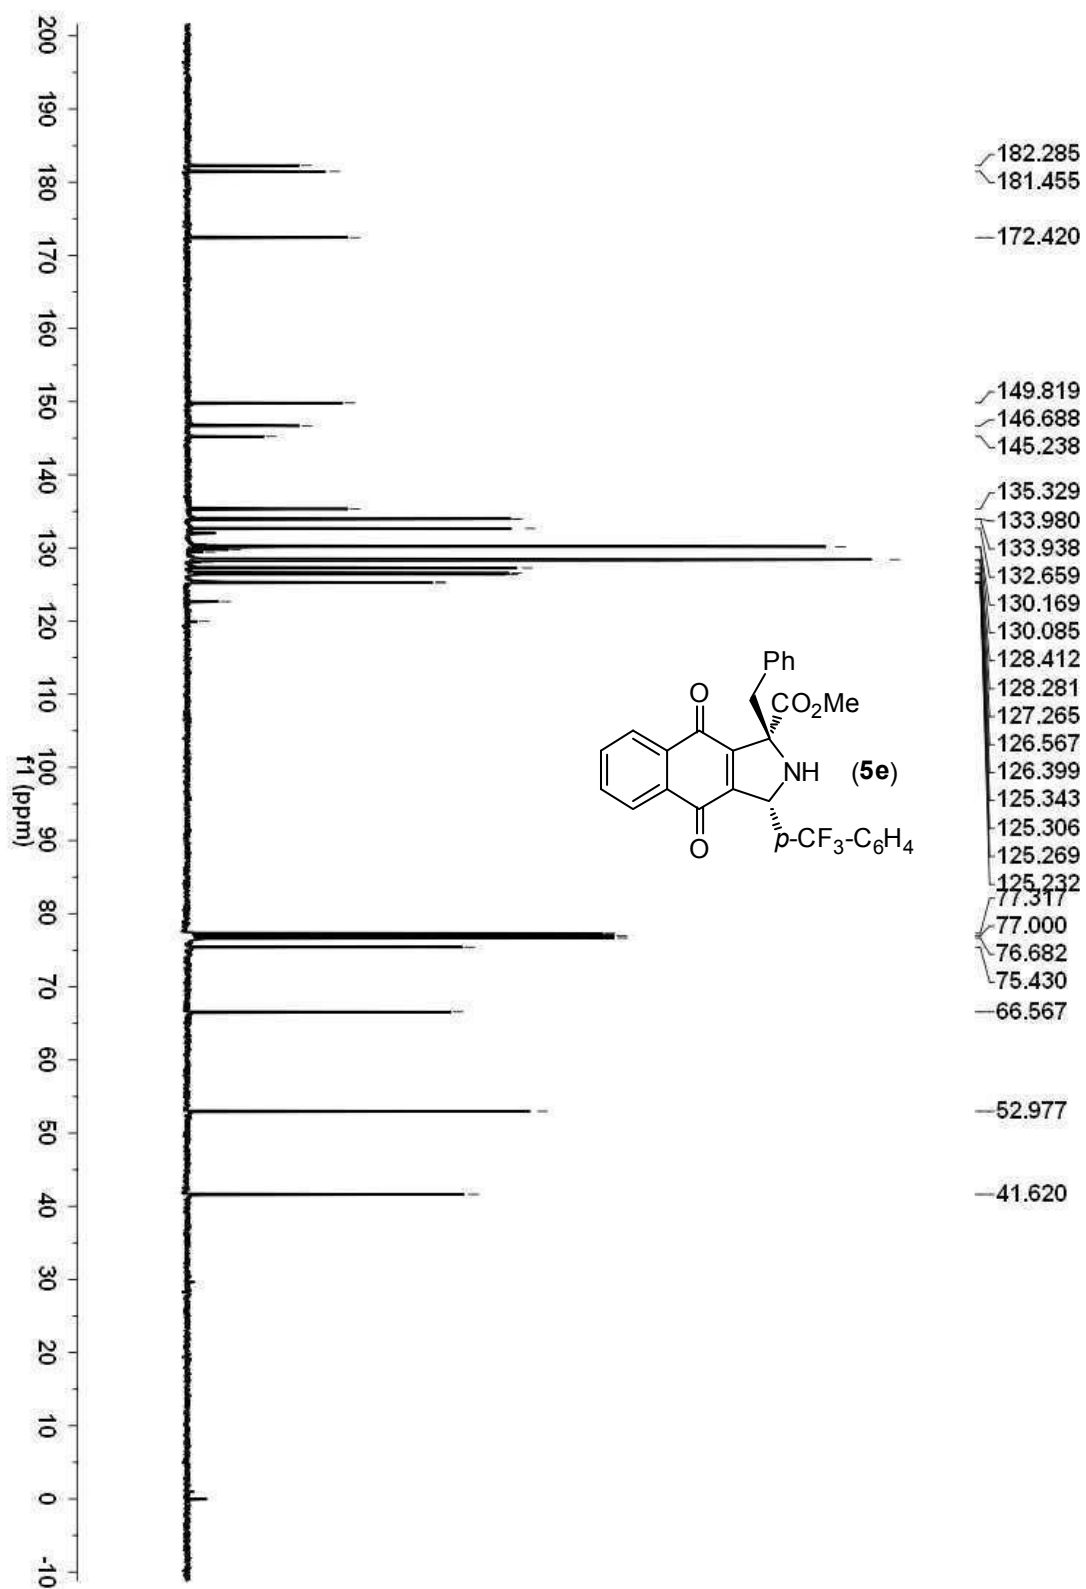

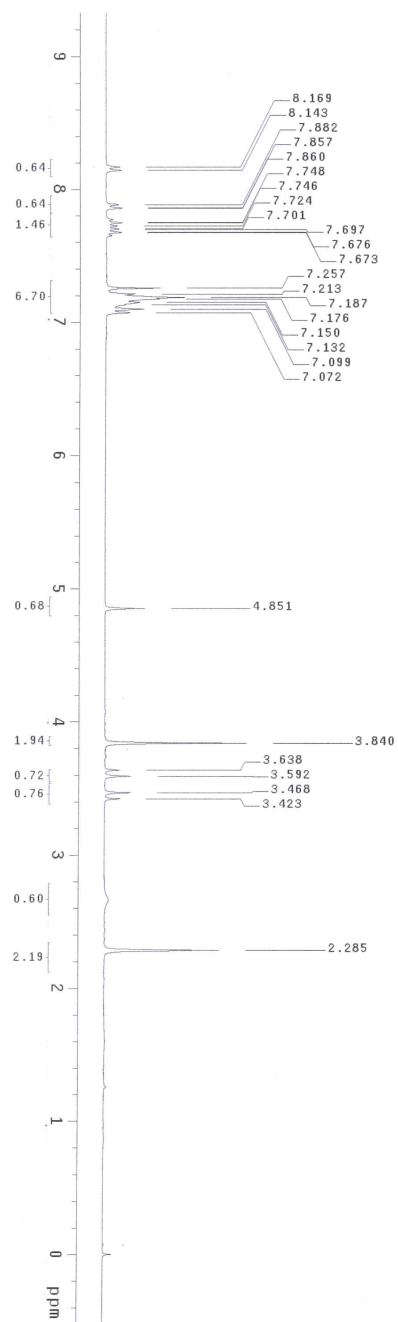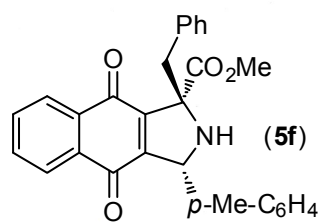

Solvent: CDCl<sub>3</sub>  
 Acquisition Date: 12/11/2008  
 Mercury-300BB "mercury300"  
 Relax. delay 1.000 sec  
 Pulse 28.0 degrees  
 Acq. time 0.500 sec  
 F1 300.136389 MHz  
 56 repetitions  
 OBSERVE C13, 75.4554921 MHz  
 DECOUPLE H1, 300.10815382 MHz  
 Power 40.00 dB  
 Locking on  
 WALTZ-16 modulated  
 DATA PROCESSING  
 Line broadening 4.0 Hz  
 F1 size 32768  
 Total time 2 hr, 24 min, 23 sec

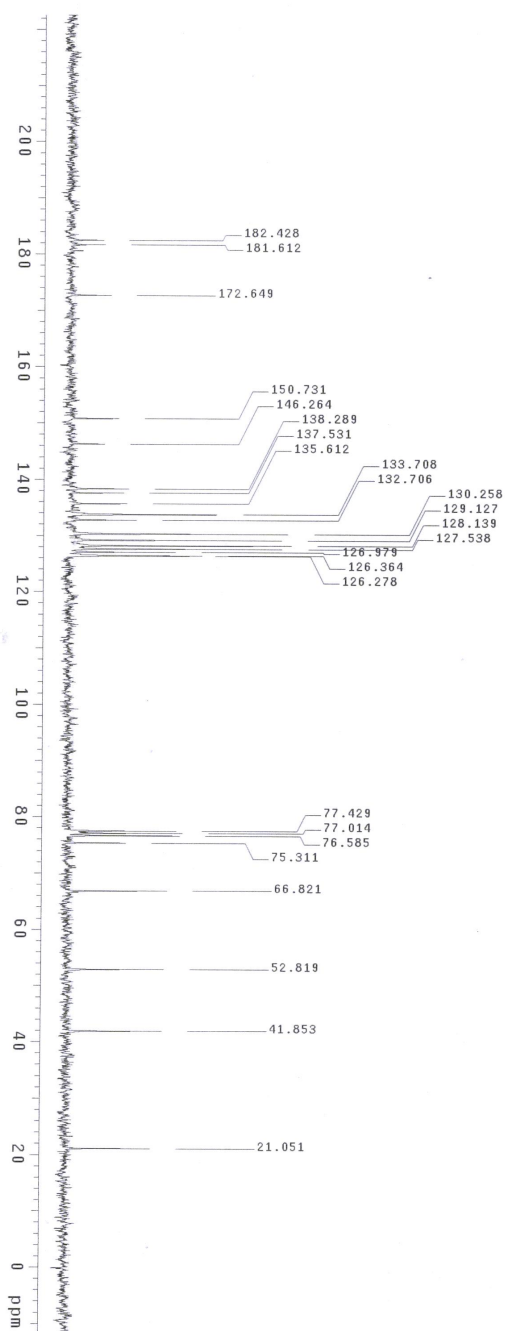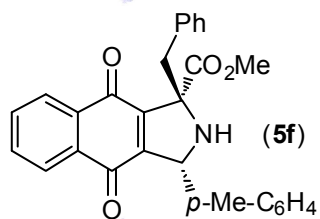

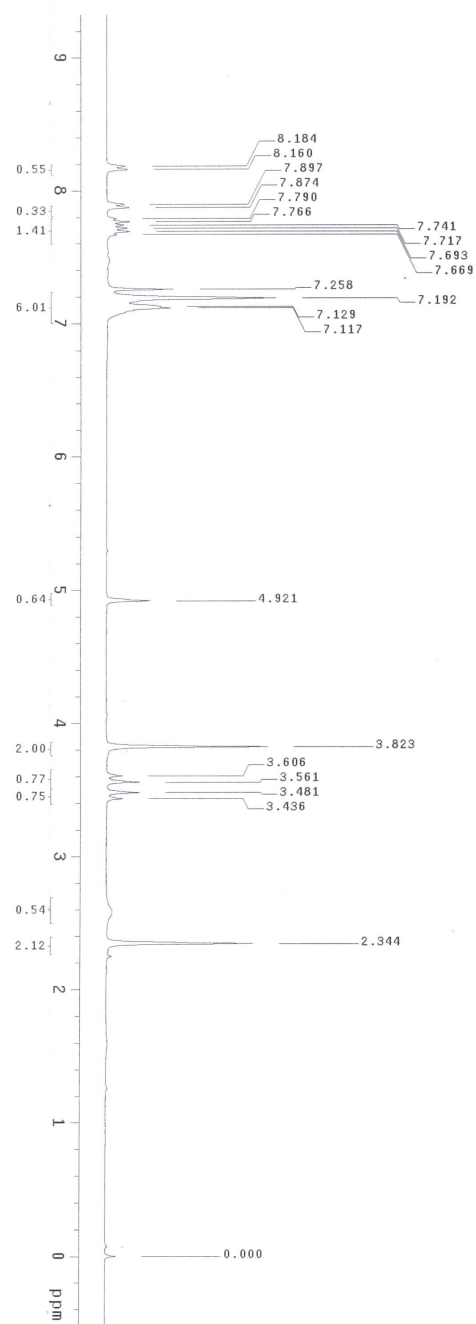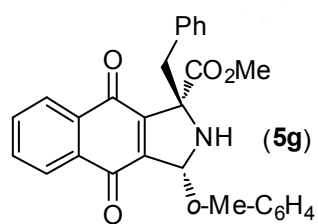

Solvent: CDCl<sub>3</sub>  
 Acquisition temperature: 300.2 K  
 Mercury-300BB "mercury300"  
 Relax. delay: 1.000 sec  
 Pulse: 28.0 degrees  
 Acq. time: 0.500 sec  
 Nuclei: 13C  
 152 repetitions  
 OBSERVE: C13, 75.4554921 MHz  
 DECOUPLE: H1, 300.0815382 MHz  
 CONTINUOUS on  
 WALTZ-16 modulated  
 DATA PROCESSING  
 Line broadening 4.0 Hz  
 F1 size 225  
 Total time 2 hr, 24 min, 23 sec

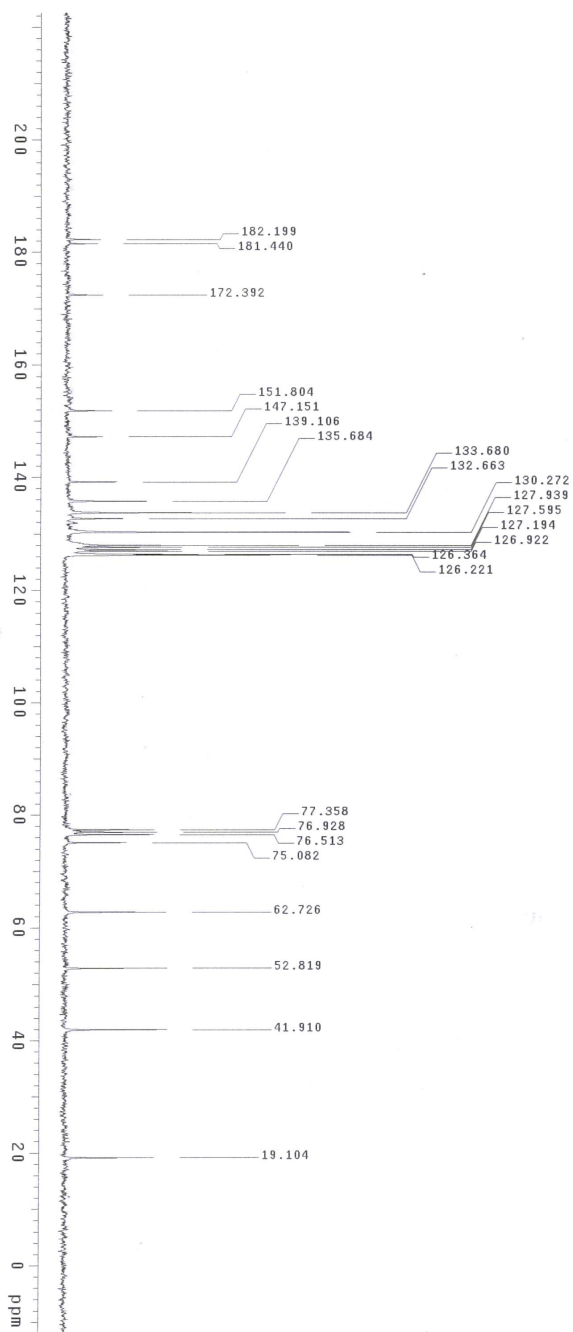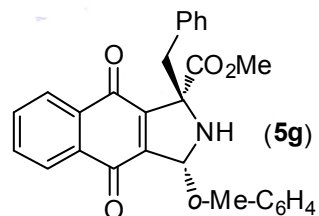



h21-4-78b-3

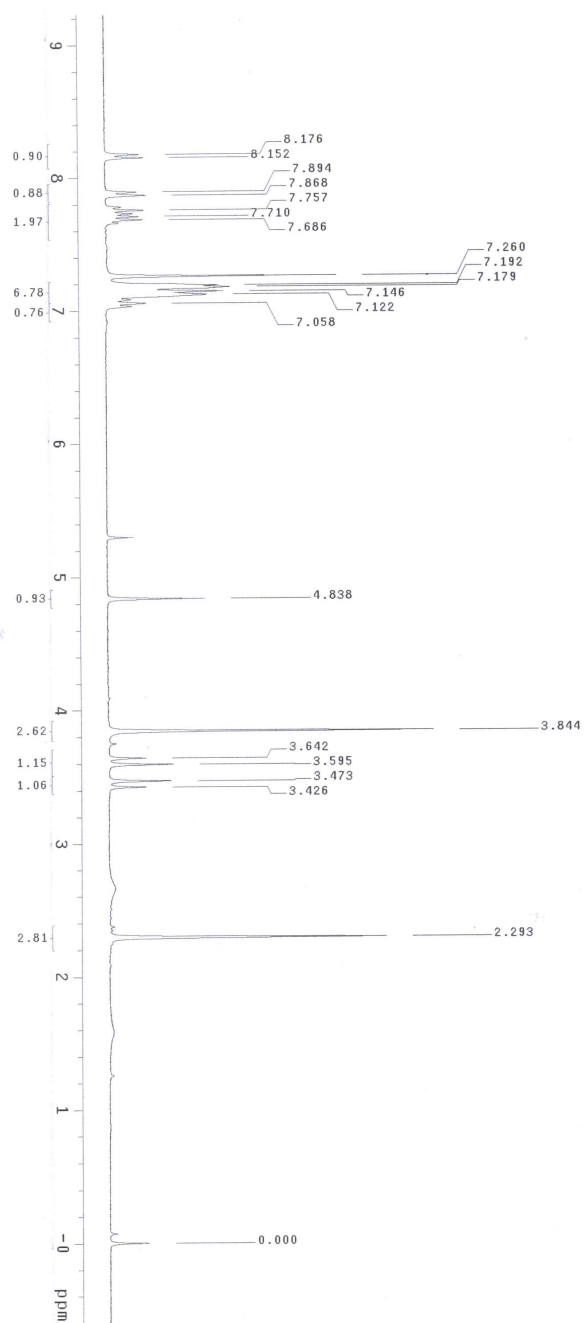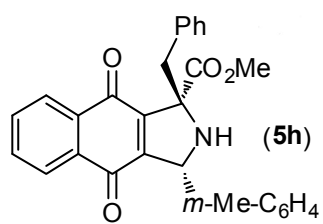

Solvent: CDCl<sub>3</sub>  
 Ambient temperature  
 Mercury-300BB "mercury300"  
 Relax. delay 1.000 sec  
 Pulse 28.0 degrees  
 Acq. time 0.50 sec  
 Width 163.1 Hz  
 Freq 125.13 MHz  
 208 repetitions  
 OBSERVE C13, 75.4554543 MHz  
 DECOUPLE H1, 300.0815362 MHz  
 Decoupling on  
 continuously on  
 WALTZ-16 modulated  
 DATA PROCESSING  
 Line broadening 4.0 Hz  
 F1 125.13 MHz  
 F2 125.13 MHz  
 Total time 2 hr, 24 min, 23 sec

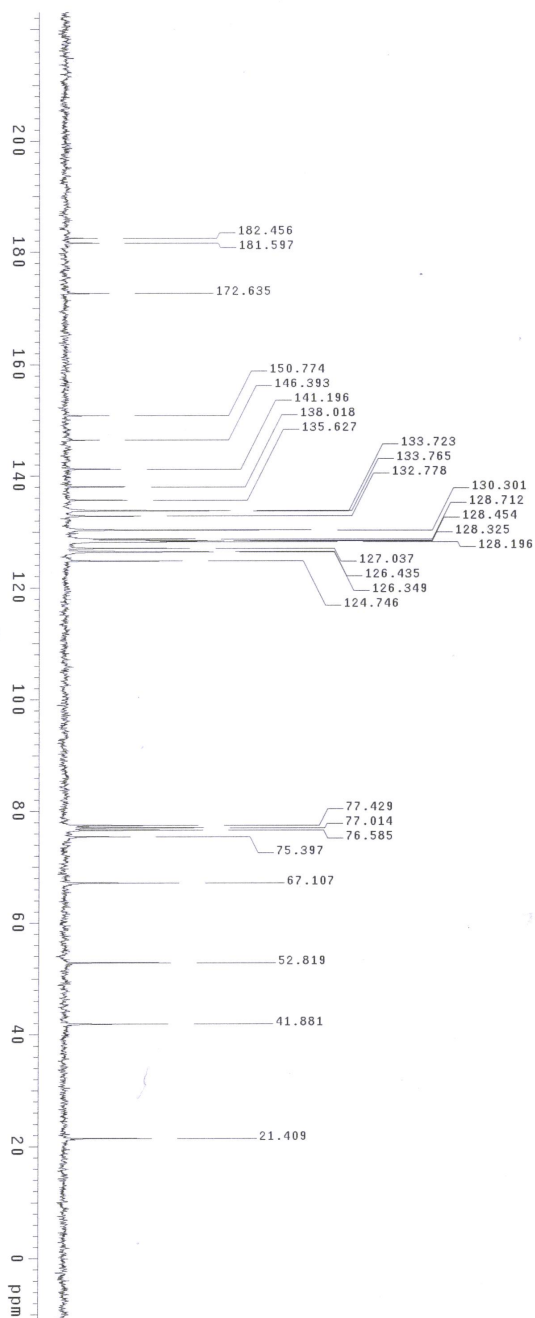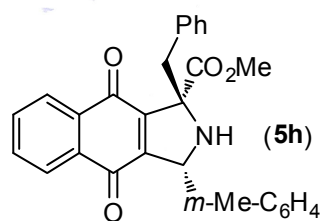

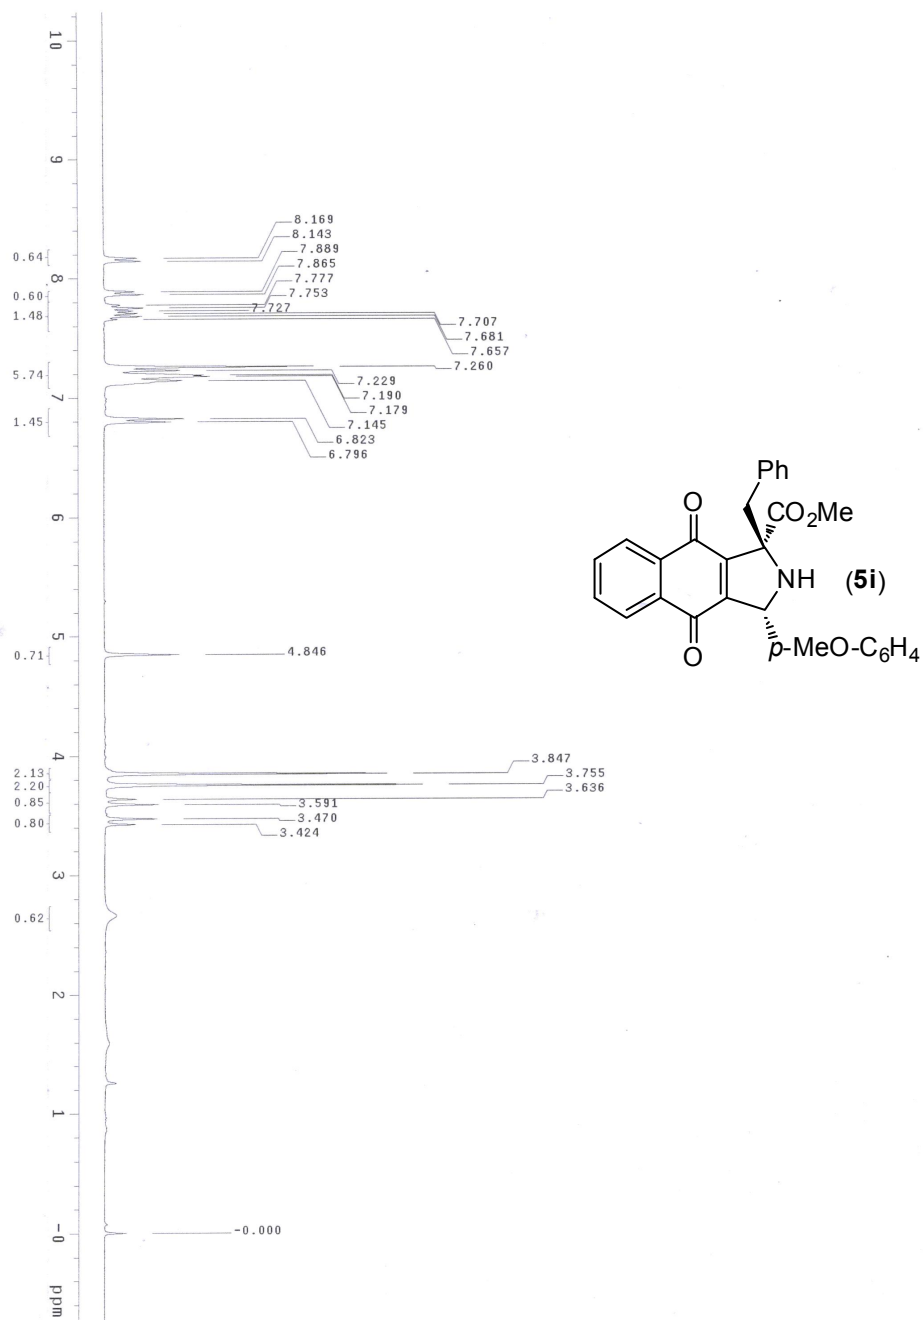

Solvent: CDCl<sub>3</sub>  
 Acquisition: 13C NMR  
 Mercury-300MB "mercury300"  
 Relax. delay 1.000 sec  
 Pulse: 28.0 degrees  
 Acq. time: 0.500 sec  
 F1: 125.761 MHz  
 192 Repetitions  
 OBSERVE: C13, 75.4559172 MHz  
 DECOUPLE: H1, 300.0815382 MHz  
 Power: 40 dB on  
 CONTINUOUS  
 WALTZ-16 modulated  
 DATA PROCESSING  
 Line broadening 4.0 Hz  
 F1 size 32768  
 Total time 2.00 hr, 24 min, 23 sec

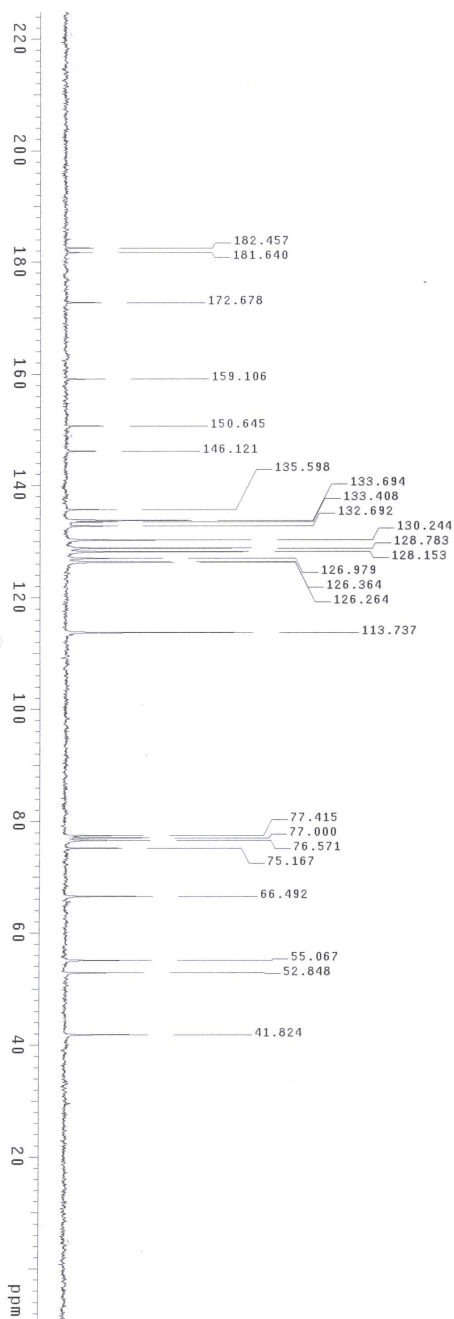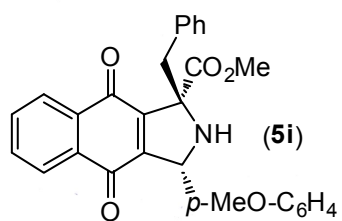

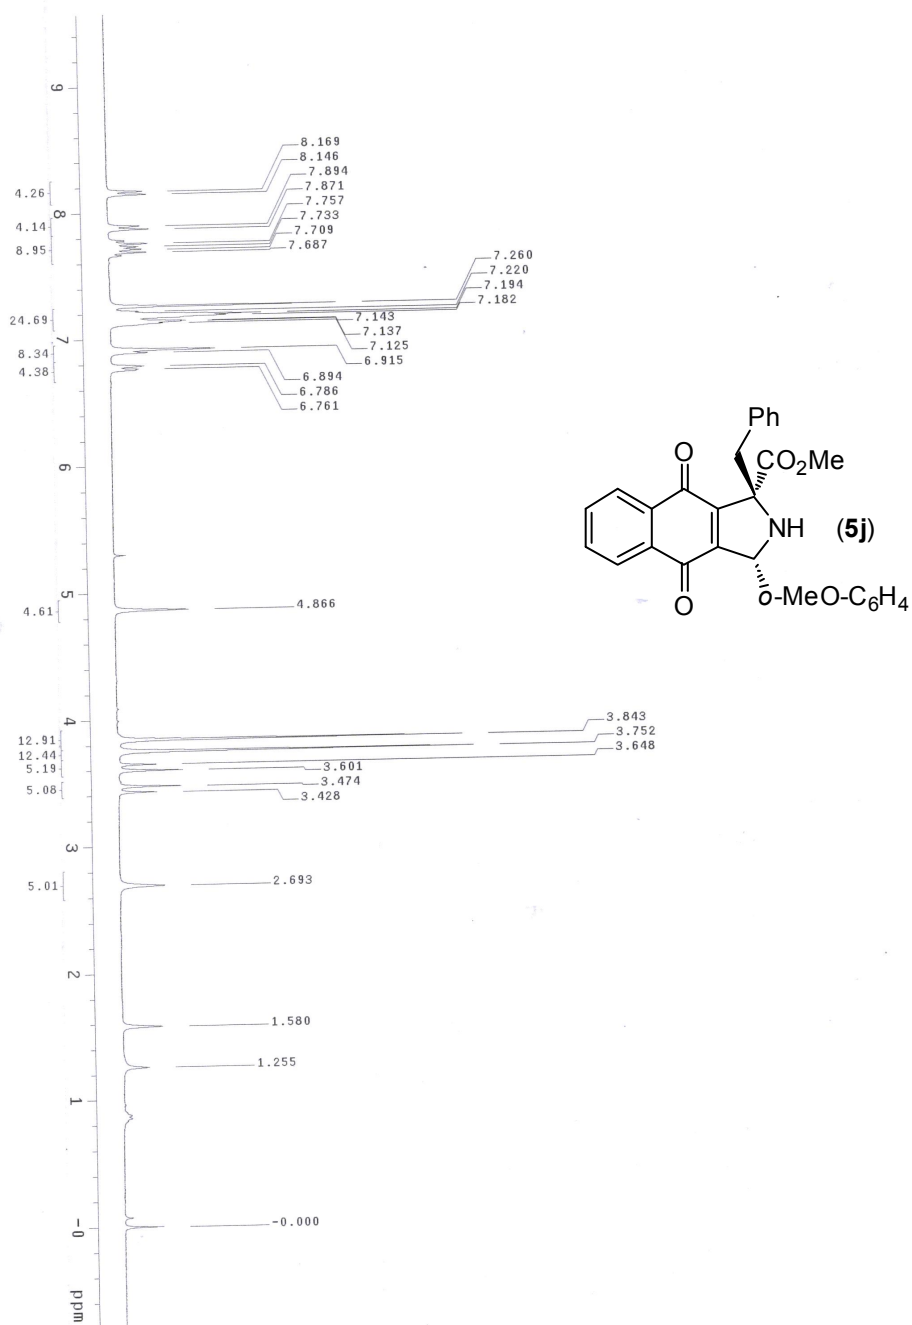

Solvent: CDCl<sub>3</sub>  
 Name: 5j  
 Temperature: 300.2 K  
 Mercury-300MHz  
 Relax. delay: 1.000 sec  
 Pulse: 28.0 degrees  
 Acq. time: 0.500 sec  
 F<sub>2</sub>: 125.761 MHz  
 F<sub>1</sub>: 125.761 MHz  
 OBSERVE C13, 75.4553161 MHz  
 DECOUPLE H1, 300.0815382 MHz  
 Power: 40.0 dB  
 H1 channel: ON  
 WALTZ-16 modulated  
 DATA PROCESSING  
 Line broadening: 4.0 Hz  
 FT size: 32768  
 Total time: 2 hr, 24 min, 23 sec

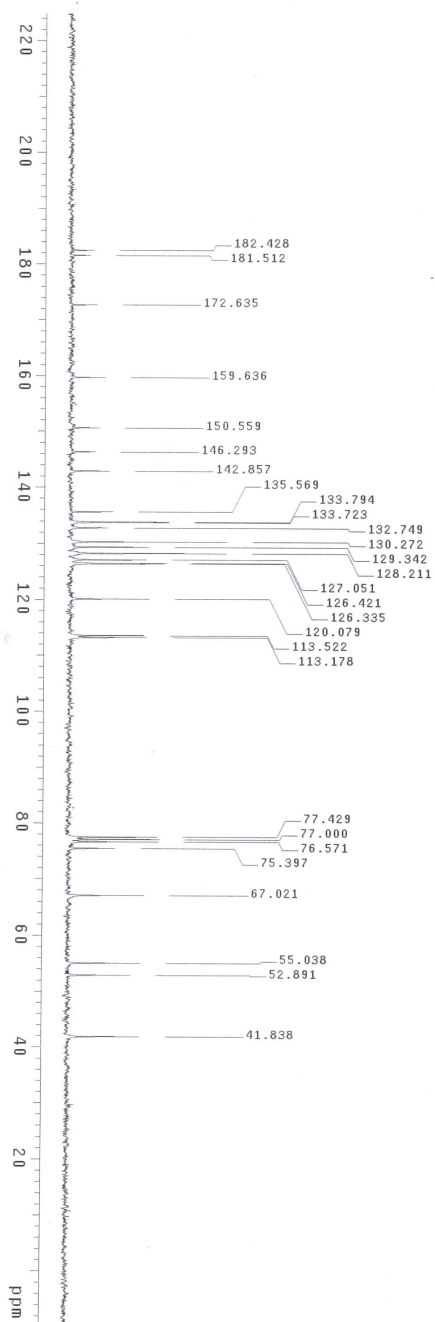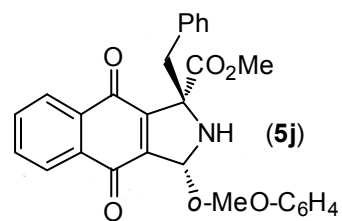

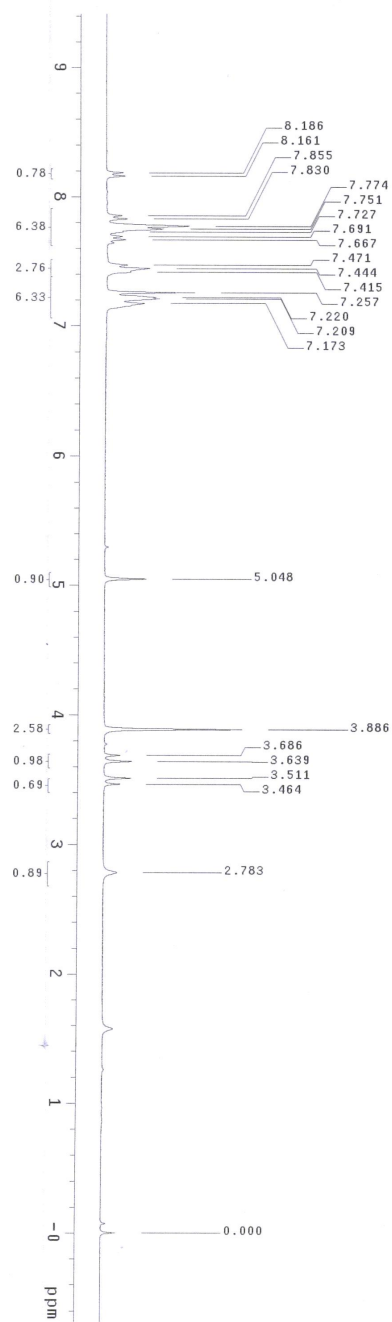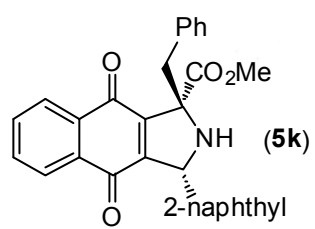

— — — — —

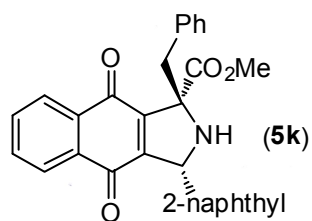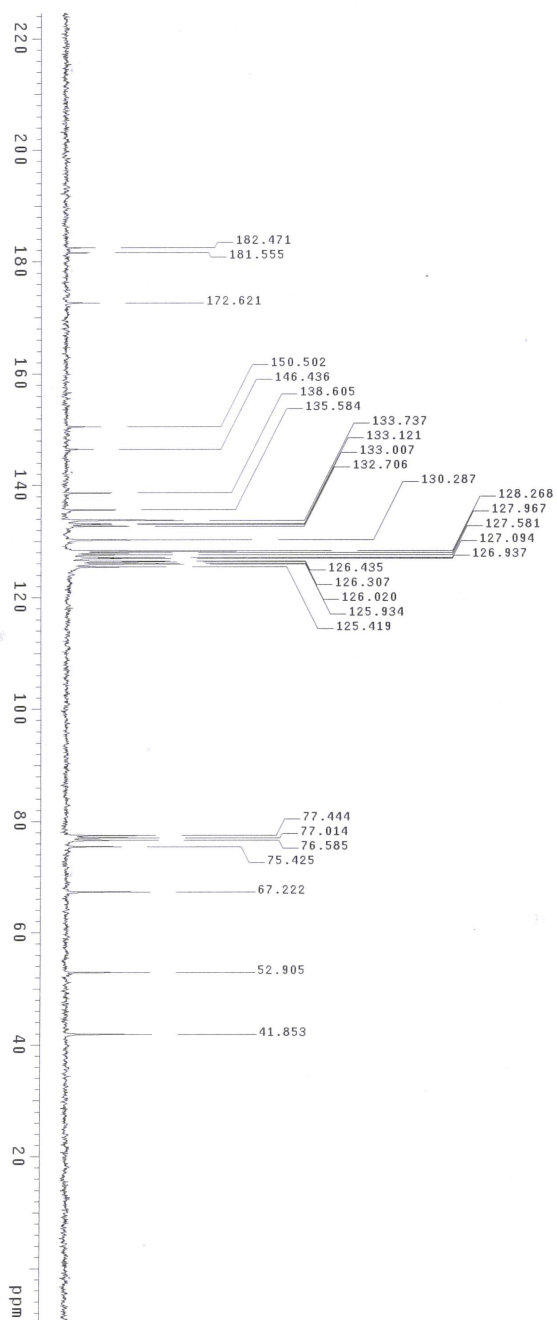



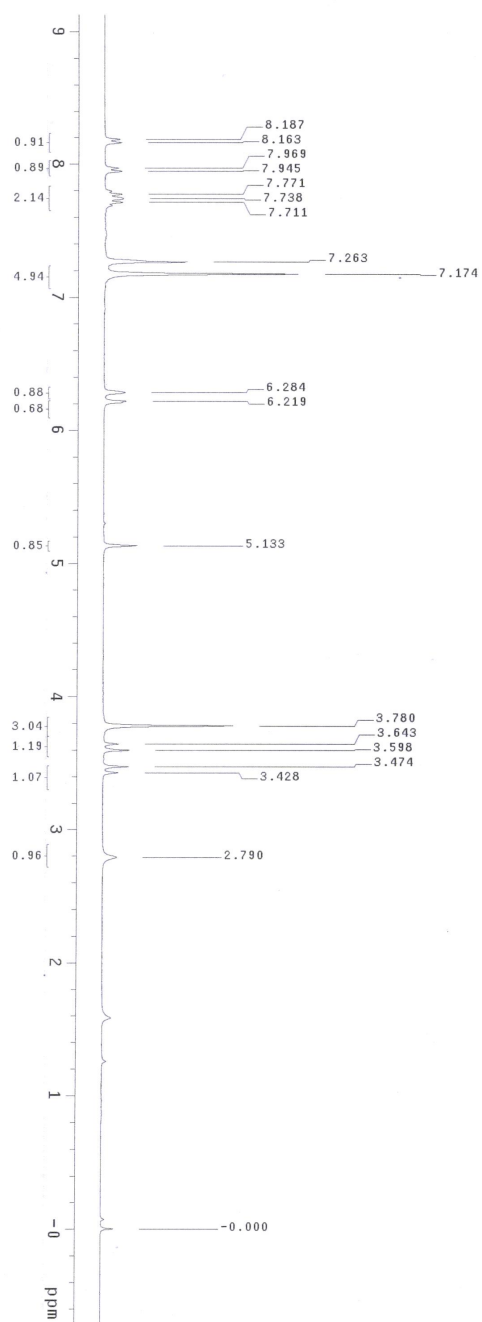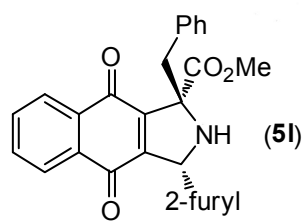

Solvent: CDCl<sub>3</sub>  
 Acquired temperature  
 Mercury-300B "mercury300"  
 Relax. delay 1.000 sec  
 Pulse 28.0 degrees  
 Acq. time 3.000 sec  
 F2 101.625 MHz  
 248 repetitions  
 OBSERVE C13, 75.4554537 MHz  
 DECOUPLE H1, 300.0815362 MHz  
 CONTINUOUSLY on  
 WALTZ-16 modulated  
 DATA PROCESSING  
 F1 line broadening 4.0 Hz  
 F2 101.625 MHz  
 Total time 2 hr, 24 min, 23 sec

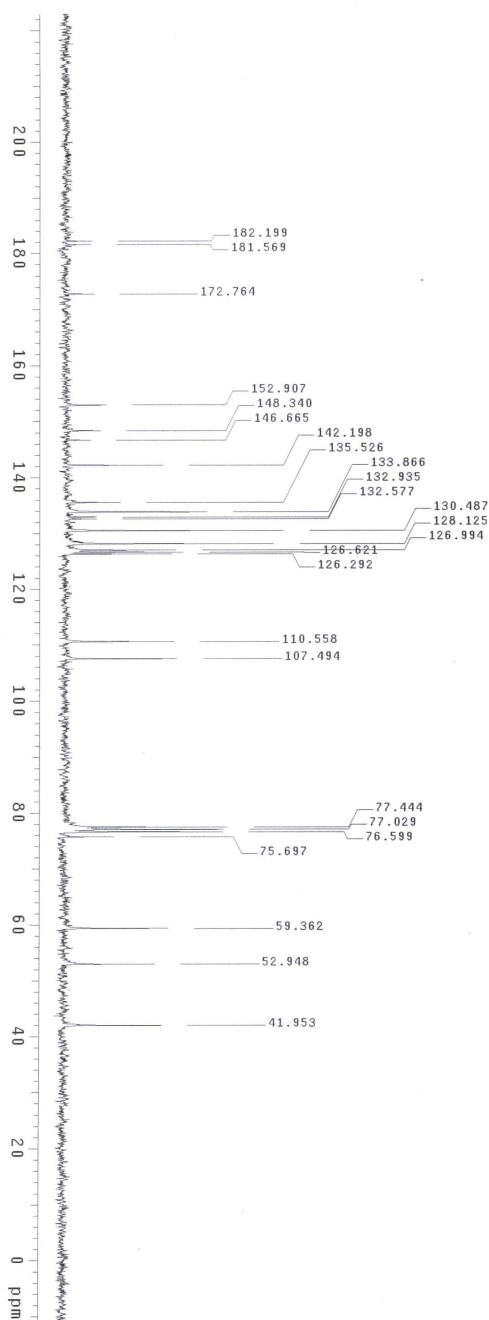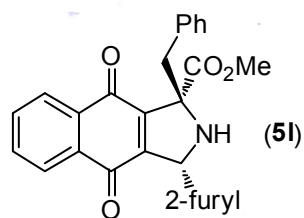

h21-4-123  
 Archive directory: /export/home/vu/vmr/sys/data  
 Sample directory:  
 File: PROTON  
 Pulse Sequence: szpu1

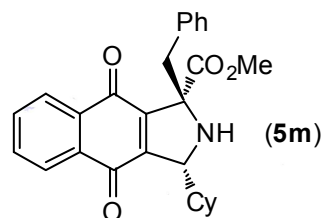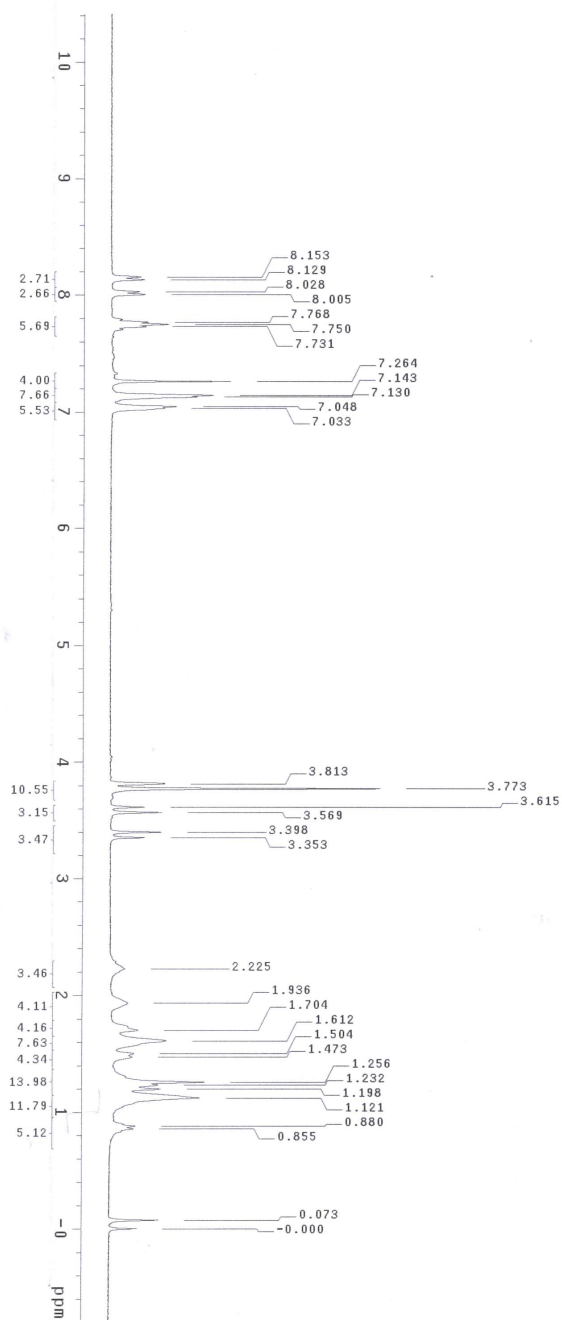

### THE ORDER

Andze sequence: szpu

Ambient temperature

.....

Relax. delay 1.000 sec

Acq. time 0.499 sec

600 repetitions

DECOUPLE H1, 300.0820522 MHz

continuously on

## DATA PROCESSING

Line numbering ... ..  
FT size 32768

LOCAL CLIMATE, 2000-2009

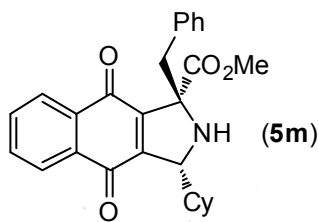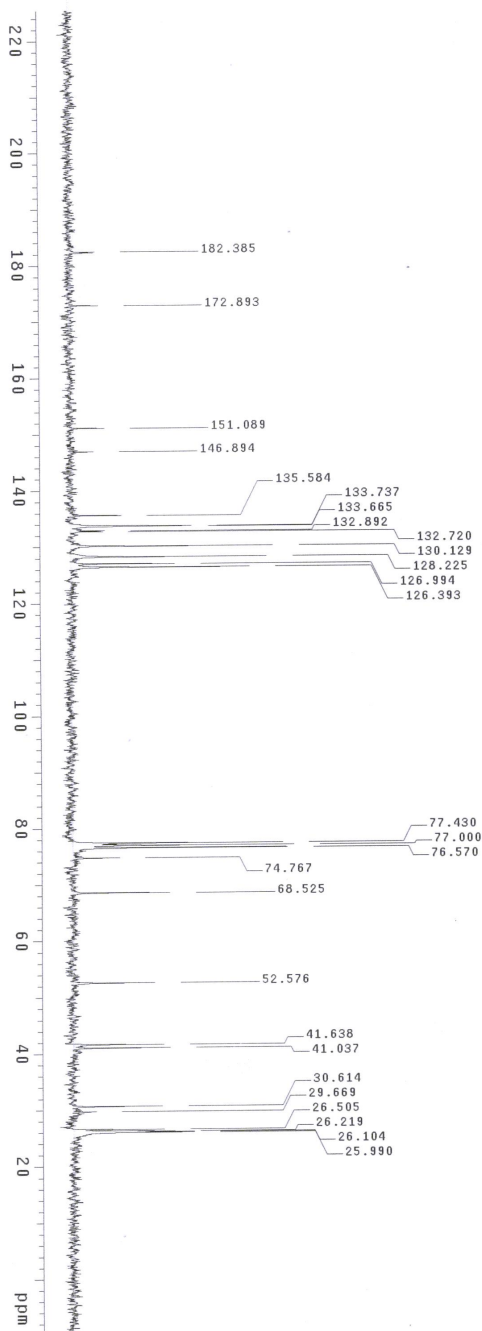

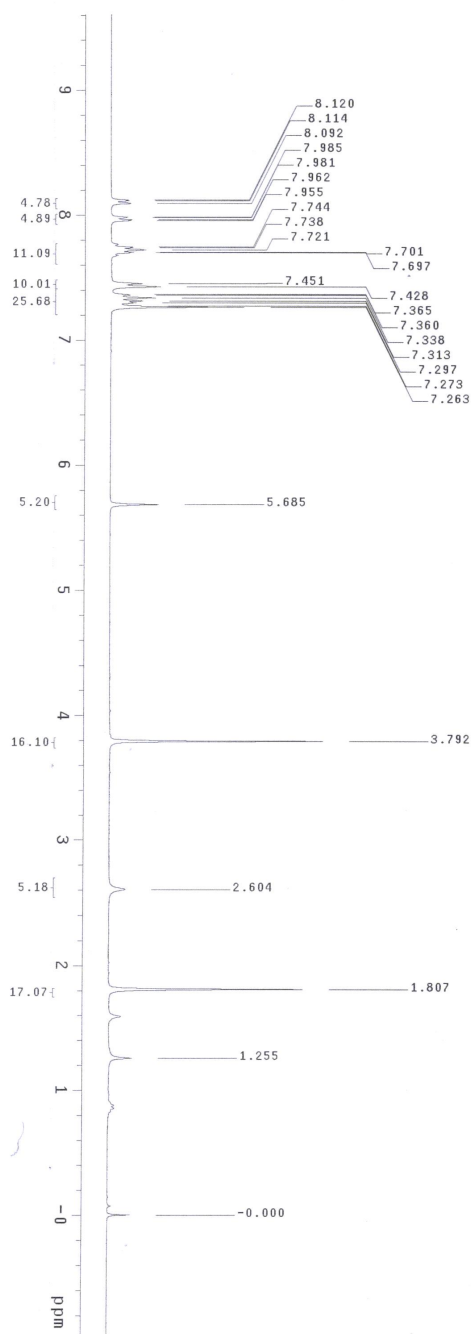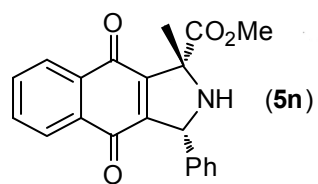

Solvent: CDCl<sub>3</sub>  
 Acquisition temperature  
 Mercury-300BB "mercury300"  
 Relax delay 1.000 sec  
 Pulse 28.0 degrees  
 Acq. time 0.50 sec  
 Width 163.1 Hz  
 Freq 125.76 MHz  
 368 repetitions  
 OBSERVE C13, 75.4552891 MHz  
 DECOUPLE H1, 300.0815382 MHz  
 100.0000000 Hz  
 continuously on  
 WALTZ-16 modulated  
 DATA PROCESSING  
 Line broadening 4.0 Hz  
 F1 25.0000000 Hz  
 Total time 2 hr, 24 min, 23 sec

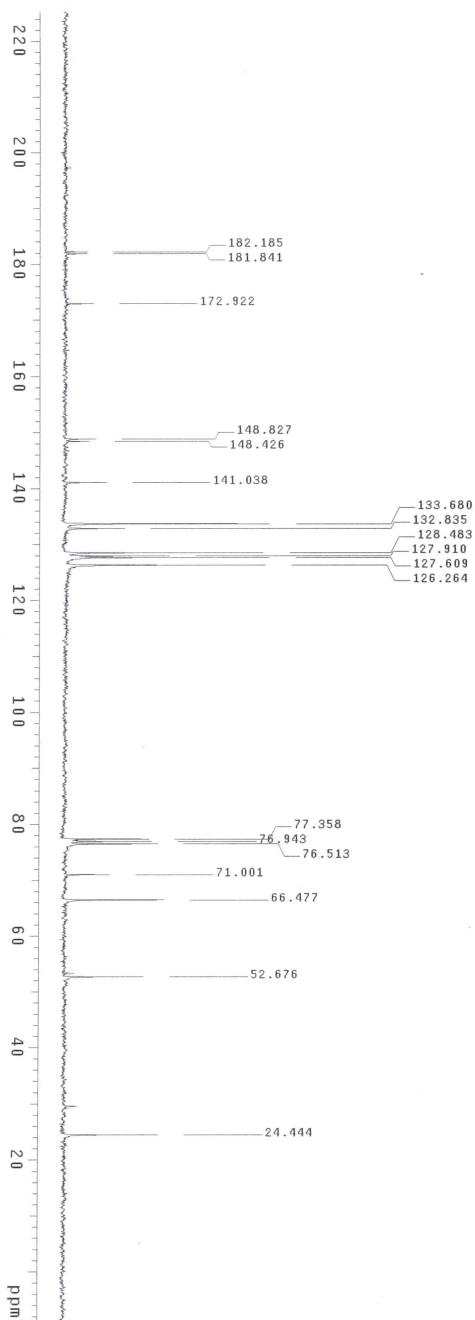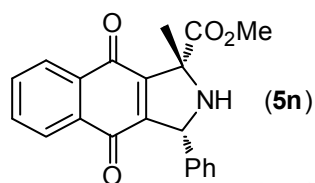

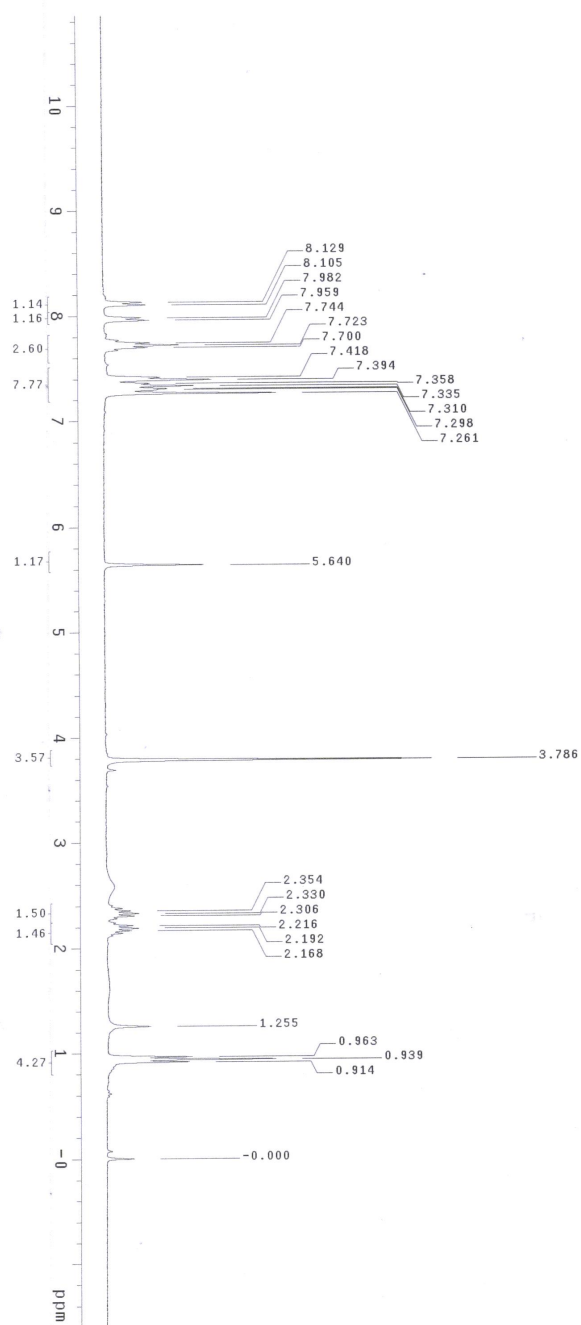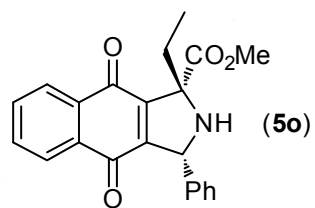

SOLVENT: CDCl<sub>3</sub>  
 Acquisition temperature  
 Mercury-300BB "mercury300"  
 Relax. delay 1.000 sec  
 Pulse 29.0 degrees  
 Acq. time 0.500 sec  
 Nucleus 13C  
 Observed 128.583 MHz  
 184 repetitions  
 OBSERVE C13, 75.4553064 MHz  
 DECOUPLE H1, 300.0815382 MHz  
 POWER 40.0 dB  
 SFO 125.761 MHz  
 CONTINUOUSLY on  
 DATA PROCESSING  
 Line broadening 4.0 Hz  
 F1 size 32768  
 Total time 2 hr, 24 min, 23 sec

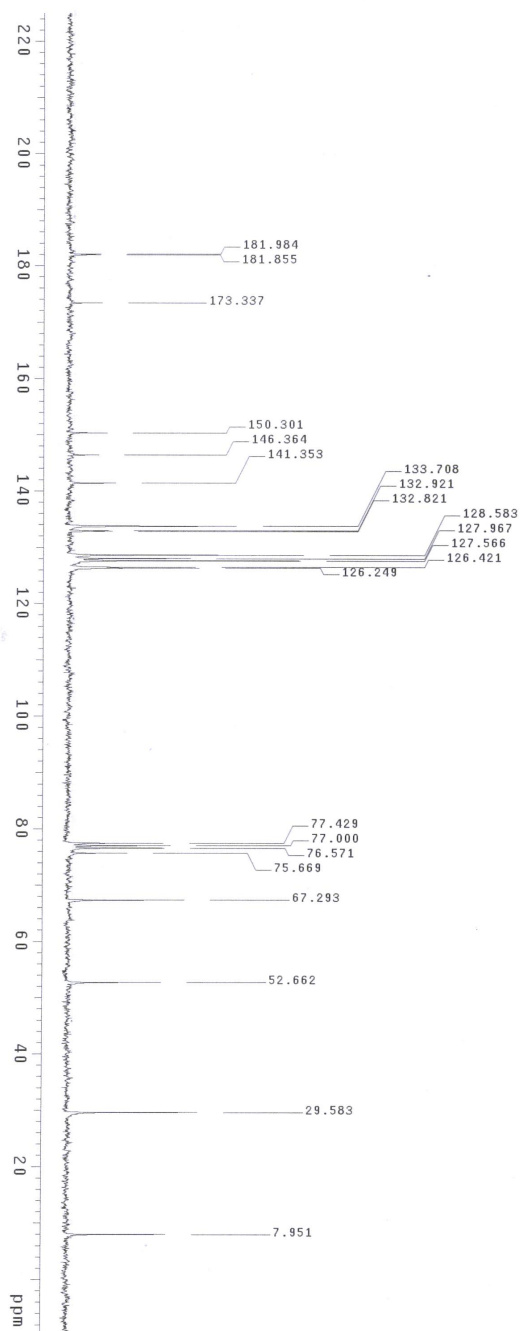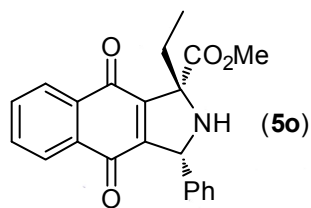



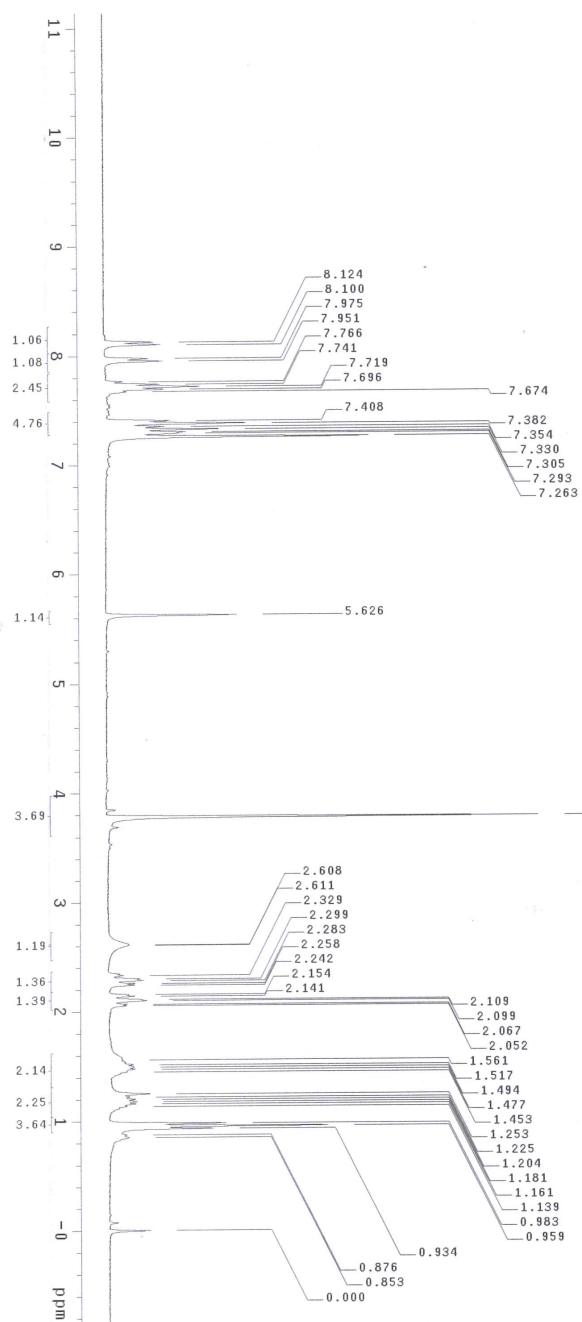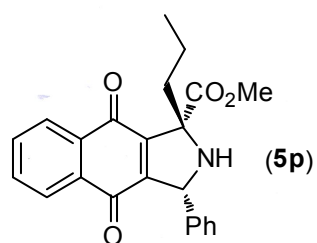

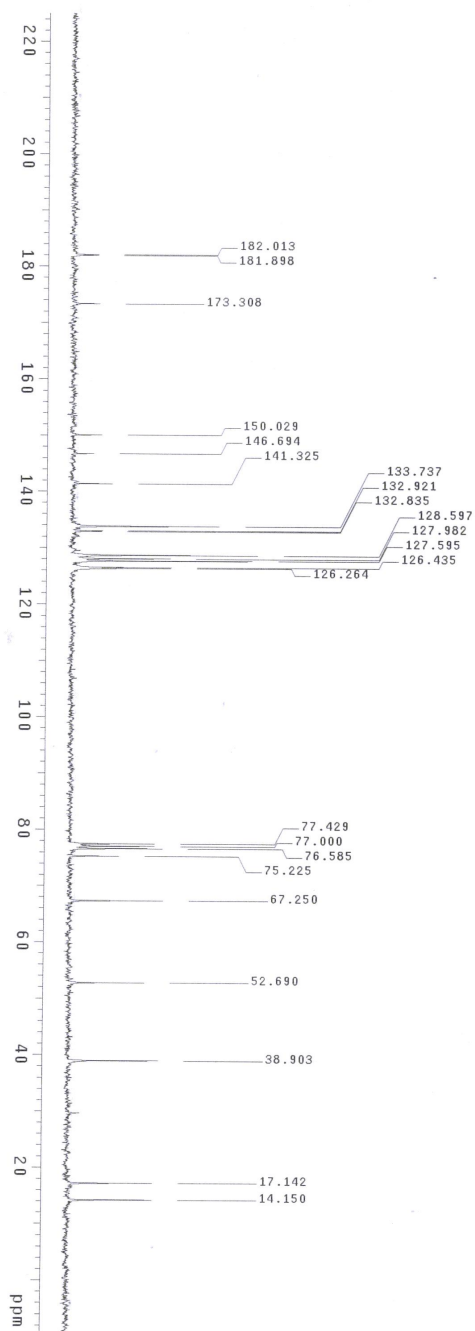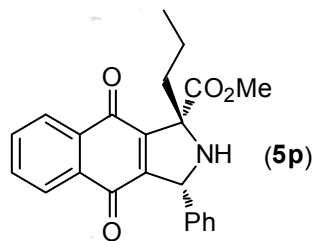

Solvent: CDCl<sub>3</sub>  
 Relax delay: 1.000 sec  
 Pulse: 28.0 degrees  
 Acq. time: 0.500 sec  
 V. In: 1013.1 Hz  
 V. Out: 1013.1 Hz  
 OBSERVE: C13, 75.453053 MHz  
 DECOUPLE: H1, 300.10815382 MHz  
 Power: 40 dB  
 WALTZ-16 modulated  
 DATA PROCESSING  
 Line broadening: 4.0 Hz  
 FT size: 32768  
 Total time: 2 hr, 24 min, 23 sec

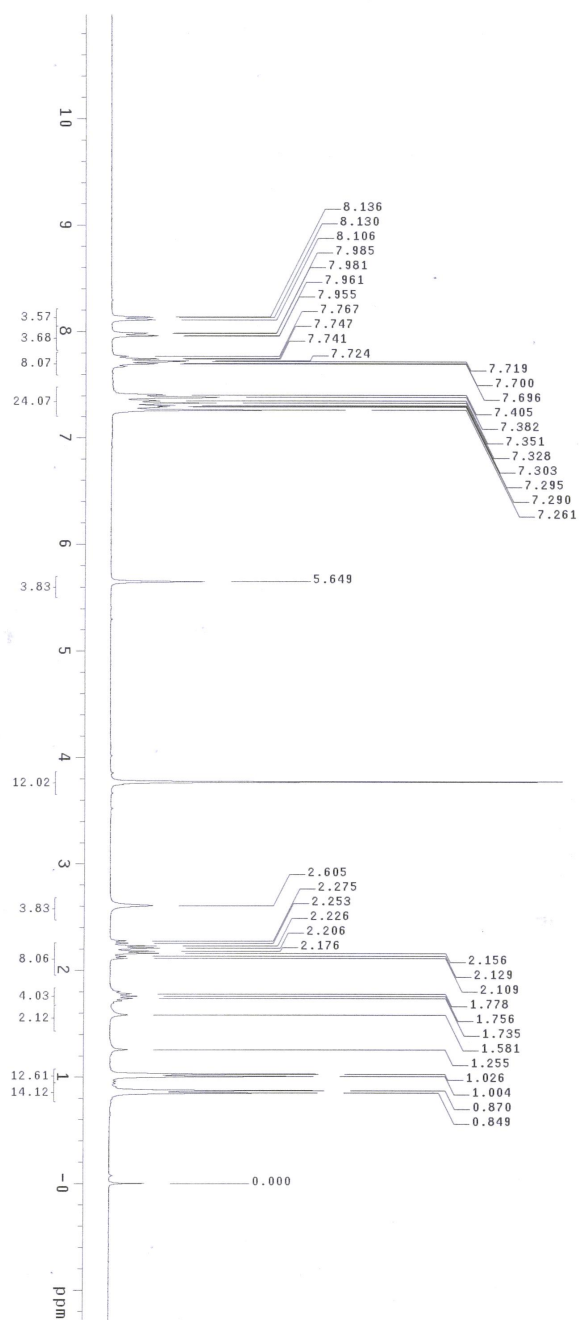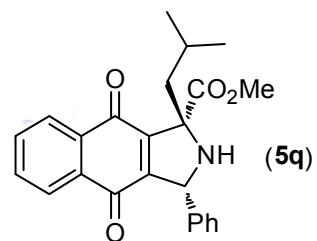

CSMD1-14-1140

Solvent: CDCl<sub>3</sub>  
 Ambient temperature  
 Mercury-500B8 Mercury3000  
 Relax delay 1.000 sec  
 Pulse 28.0 degrees  
 Acq. time 0.500 sec  
 Width 17699.1 Hz  
 240.000 MHz  
 OBSERVE C13 101.75, 4553085 MHz  
 DECOUPLE H1, 300.0815382 MHz  
 Power 40 dB  
 continuously on  
 MATHS integrated  
 DATA PROCESSING  
 Line broadening 4.0 Hz  
 FT size 32768  
 Total time 2 hr, 24 min, 23 sec

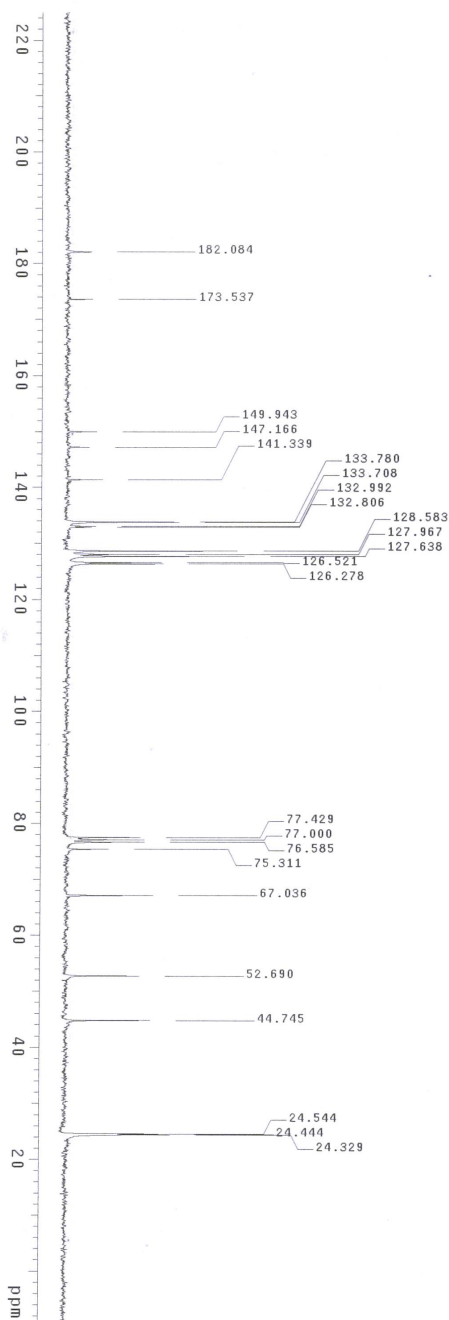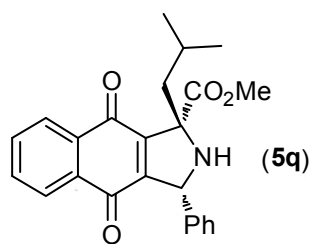

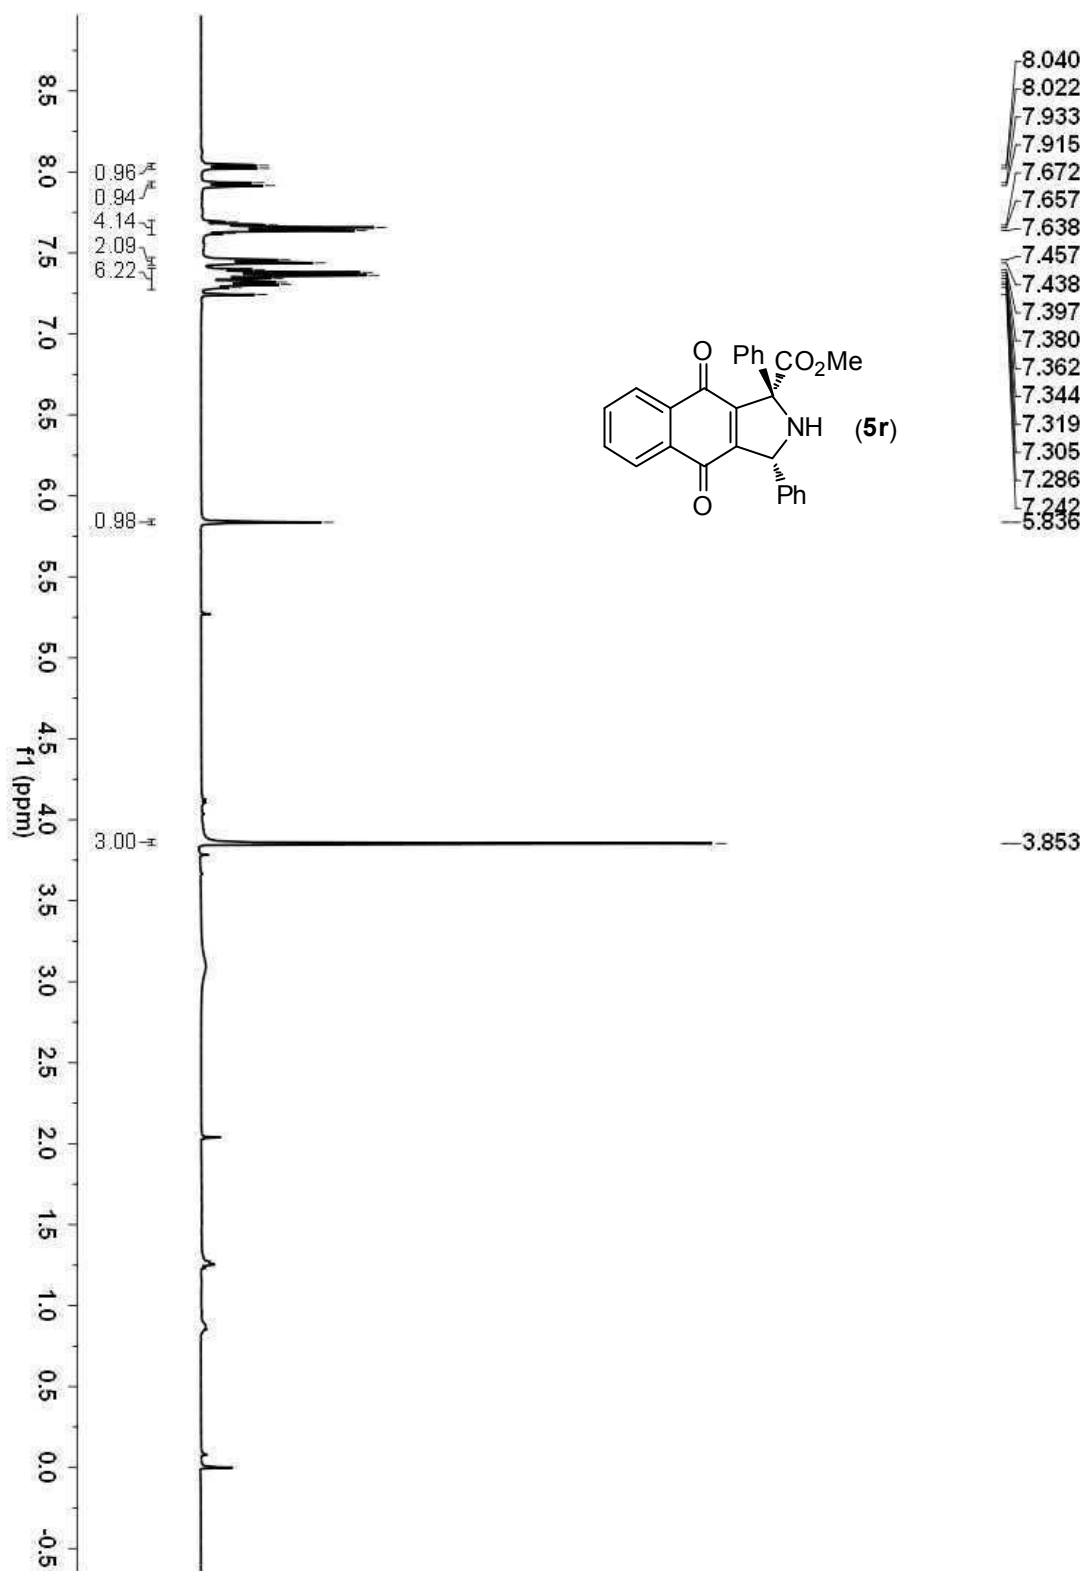

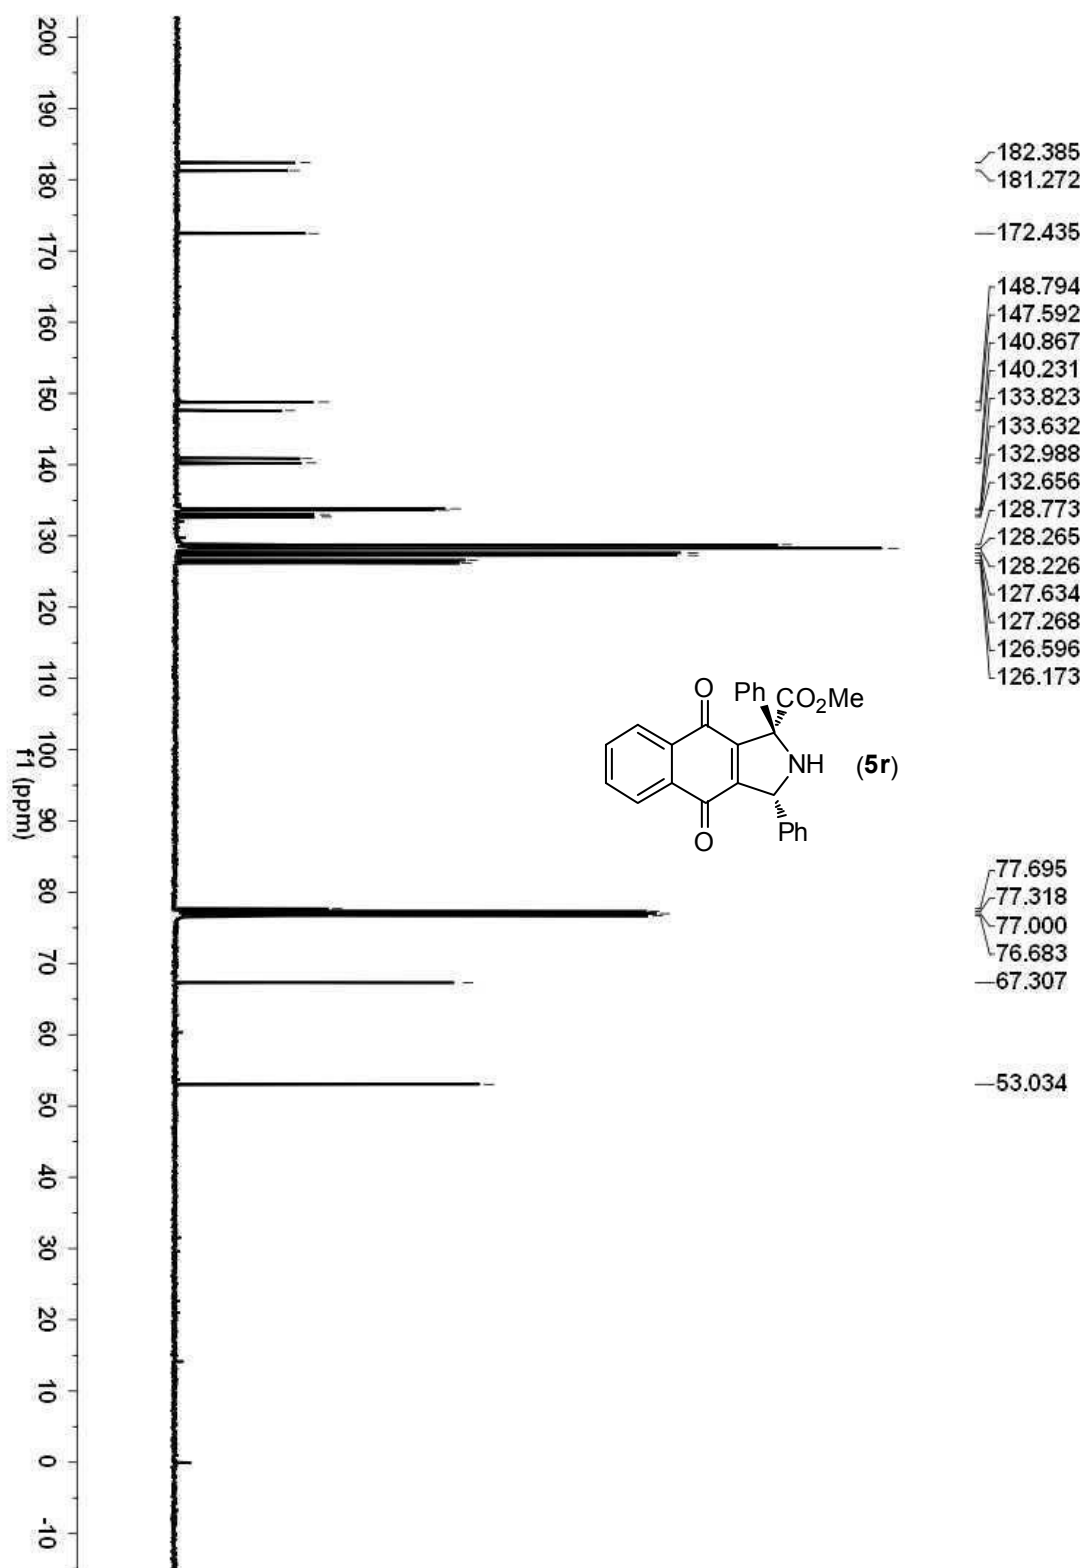

h21-4-120  
 Archive directory: /export/home/vu/vnmr/sys/data  
 Sample directory:  
 File: PROTON  
 Pulse Sequence: szpu1

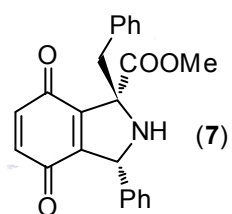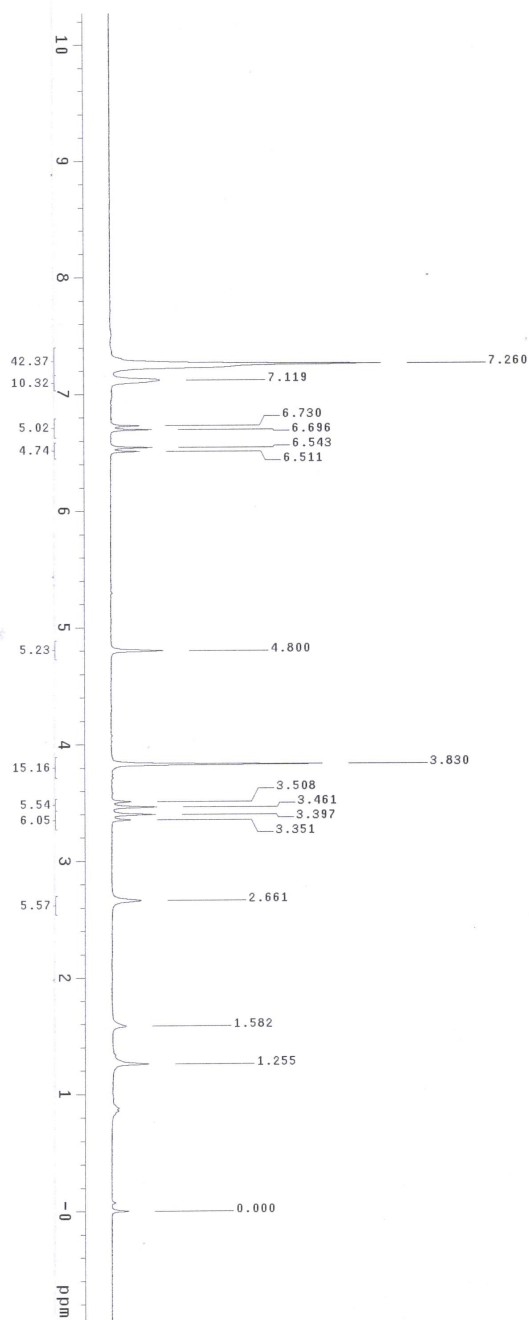

Archive directory: /export/home/jw/vnmr/sys/data  
 Sample directory:  
 File: CARBON  
 Pulse Sequence: s2pul1  
 Solvent: CDCl3  
 Ambient temperature  
 Mercury-300BB "mercury300"  
 Relax: delay 1.000 sec  
 Pulse 28.0 degrees  
 Width 1769.4 Hz  
 Width 1769.4 Hz  
 296 repetitions  
 OBSERVE C13, 75.4552828 MHz  
 DECOUPLE H1, 300.0620522 MHz  
 296 repetitions  
 continuously on  
 WALTZ-16 modulated  
 DATA PROCESSING  
 Line broadening 4.0 Hz  
 F1 152.2446  
 F2 152.2446  
 Total time 2 hr, 24 min, 19 sec

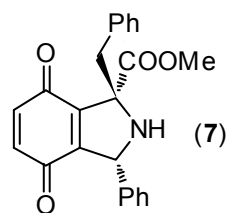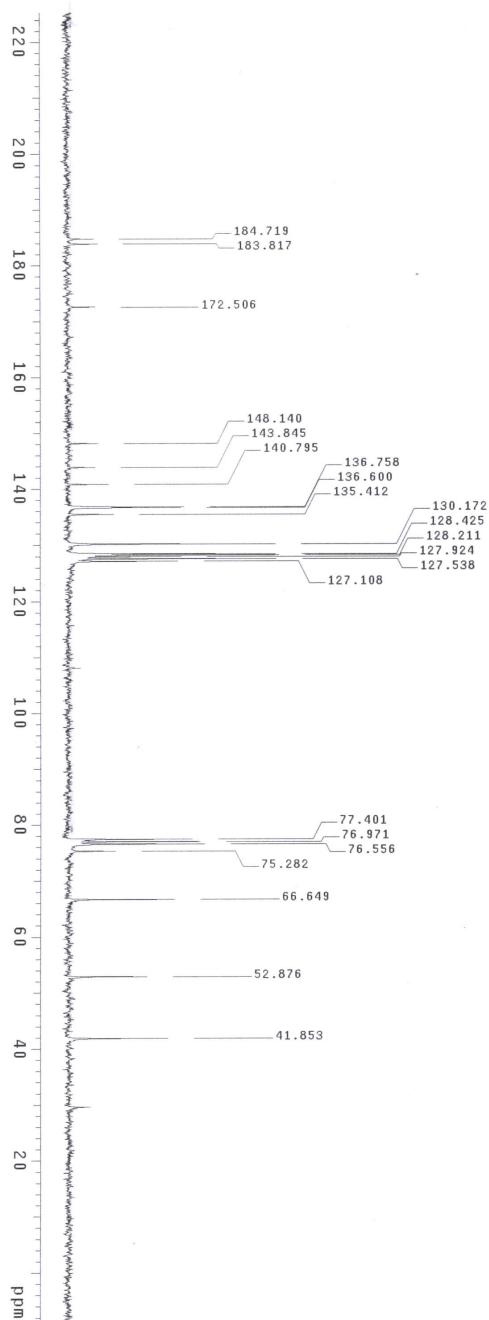



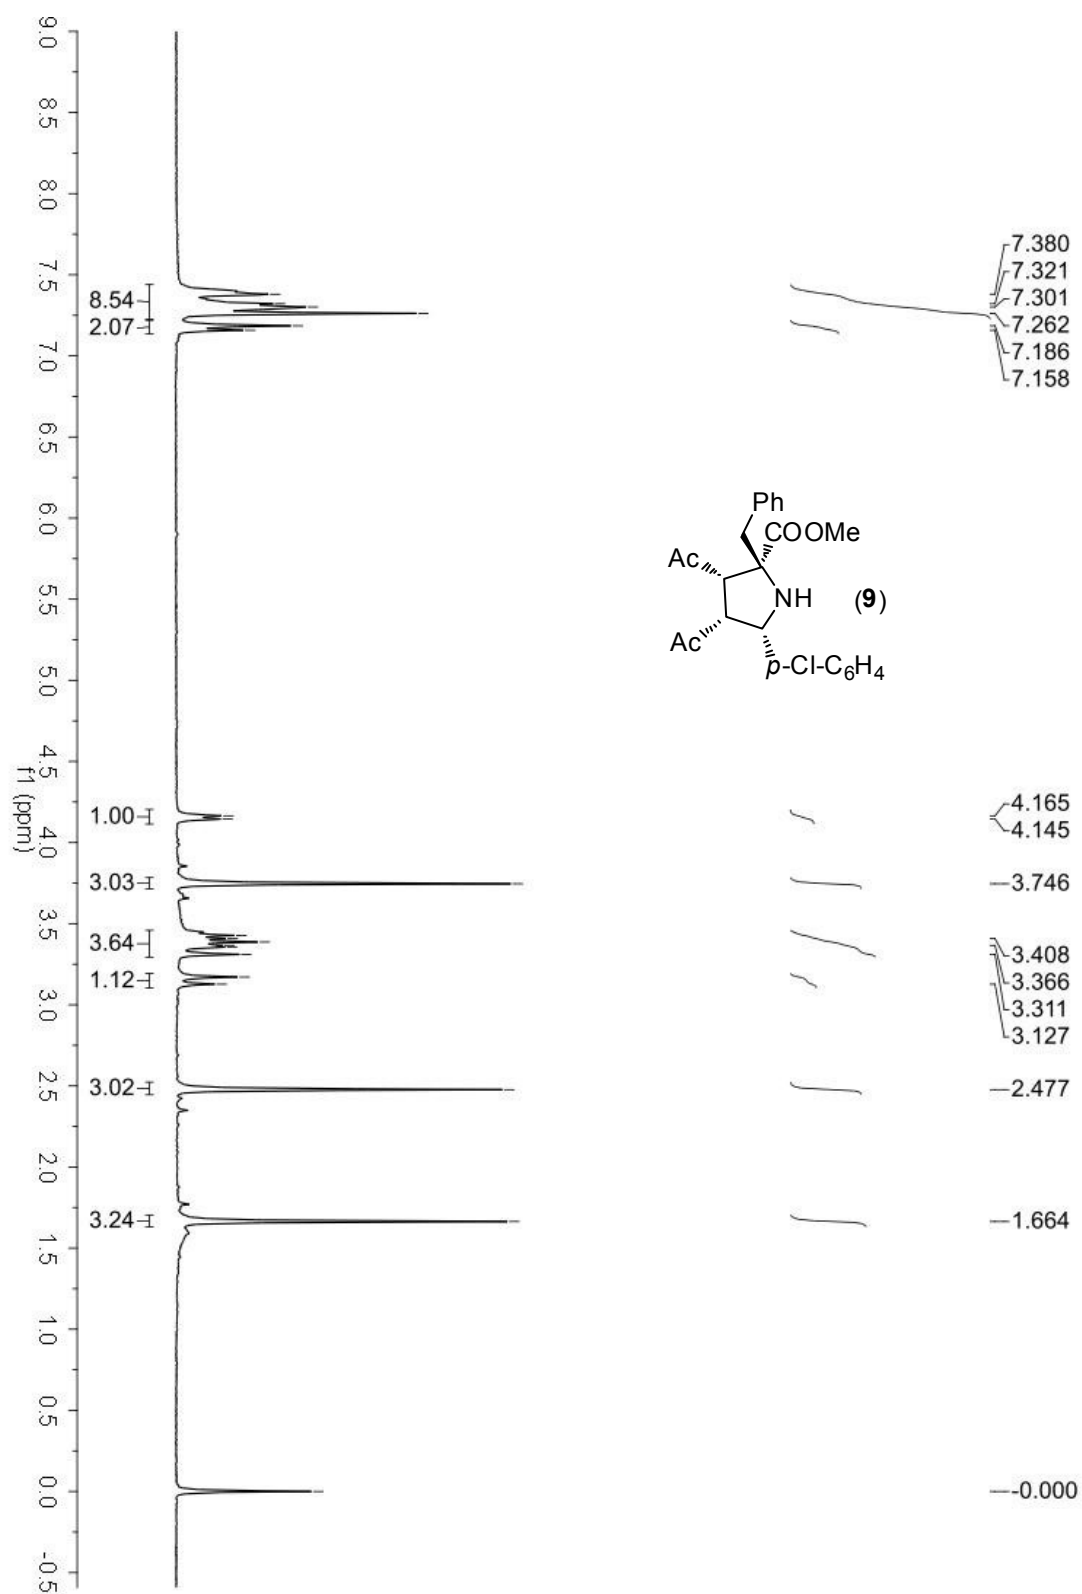

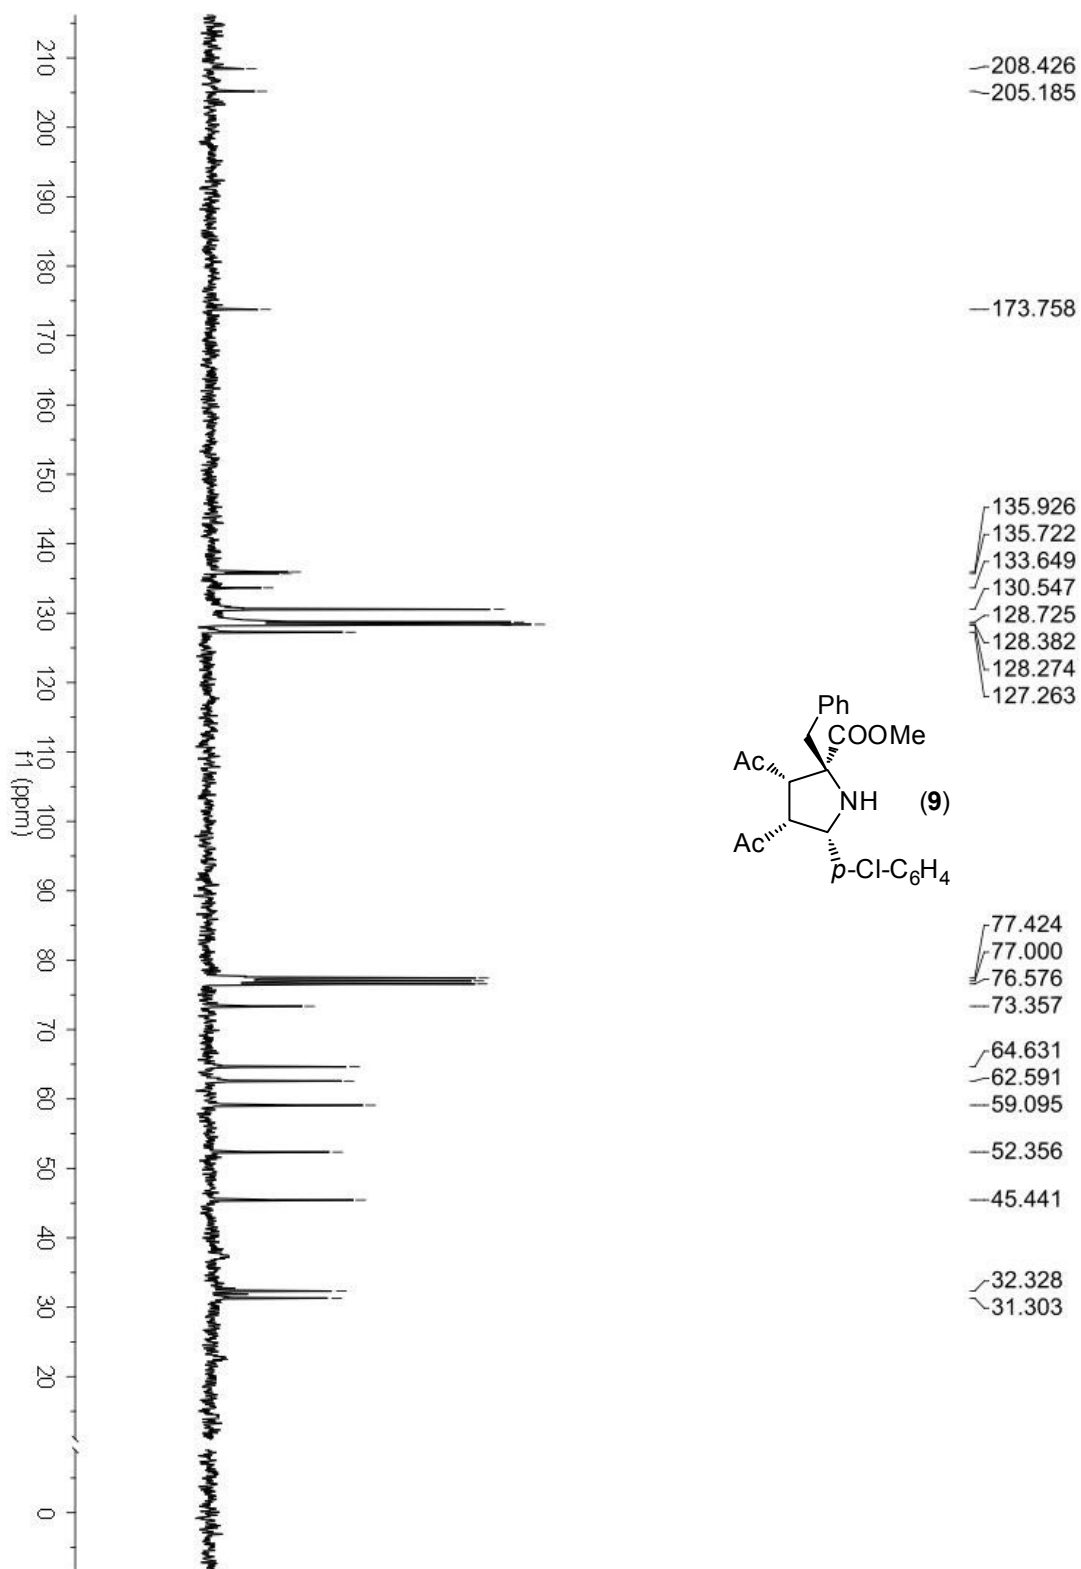

## IX. HPLC Chromatograms

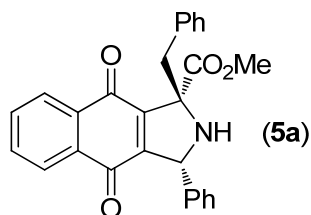

Data File D:\LC\DATA\H2L\H2L-4-29\H2L-4-29 2011-10-18 18-40-49\001-0201.D  
 Sample Name: H2L-4-29

```
=====
Acq. Operator   : H2L                      Seq. Line :    2
Acq. Instrument : Instrument 1              Location  : Vial 1
Injection Date  : 10/18/2011 6:52:46 PM     Inj       :    1
                                           Inj Volume: 5 µl
Acq. Method     : D:\LC\H2L\Data\H2L-4-29\H2L-4-29 2011-10-18 18-40-49\ASH-20-80-10ML-220NM.
M
Last changed    : 8/29/2011 3:56:33 PM by H2L
Analysis Method : D:\LC\DATA\H2L\H2L-4-29\H2L-4-29 2011-10-18 18-40-49\001-0201.D\DA.M (ASH-
20-80-10ML-220NM.M)
Last changed     : 9/24/2012 9:57:12 AM by FX
                  (modified after loading)
=====
```

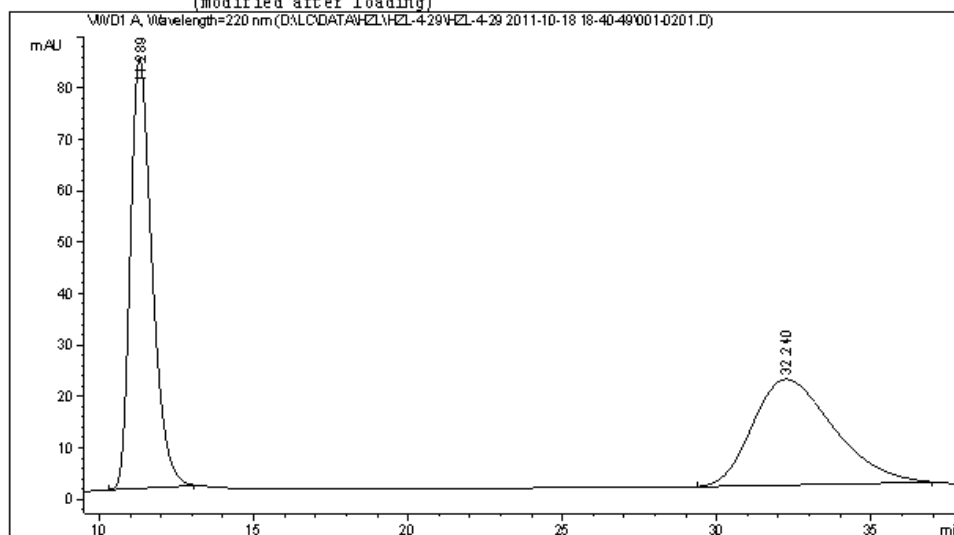

### Area Percent Report

```
Sorted By      : Signal
Multiplier     : 1.0000
Dilution       : 1.0000
Use Multiplier & Dilution Factor with ISTDs
```

Signal 1: VMD1 A, Wavelength=220 nm

| Peak # | RetTime [min] | Type | Width [min] | Area mAU *s | Height [mAU] | Area %  |
|--------|---------------|------|-------------|-------------|--------------|---------|
| 1      | 11.289        | BB   | 0.7515      | 4096.40576  | 83.69995     | 52.1176 |
| 2      | 32.240        | BB   | 2.1436      | 3763.51929  | 20.59521     | 47.8824 |

Totals : 7859.92505 104.29516

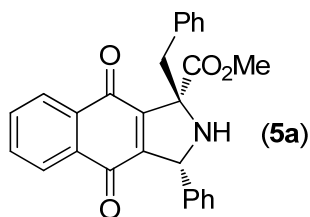

Data File D:\LC\201111\H2L\H2L-4-51\H2L-4-51 2011-11-04 21-12-02\001-0101.D  
Sample Name: H2L-4-51B

```
=====
Acq. Operator   : H2L                      Seq. Line :    1
Acq. Instrument : Instrument 1              Location  : Vial 1
Injection Date  : 11/4/2011 9:13:17 PM      Inj       :    1
                                           Inj Volume: 5 µl

Acq. Method     : D:\LC\201111\H2L\H2L-4-51\H2L-4-51 2011-11-04 21-12-02\ASH-20-80-10ML-
                  220NM-45MIN.M
Last changed    : 8/29/2011 3:55:38 PM by H2L
Analysis Method : D:\LC\201111\H2L\H2L-4-51\H2L-4-51 2011-11-04 21-12-02\001-0101.D\DA.M (
                  ASH-20-80-10ML-220NM-45MIN.M)
Last changed    : 12/12/2011 4:39:01 PM by yl
                  (modified after loading)
=====
```

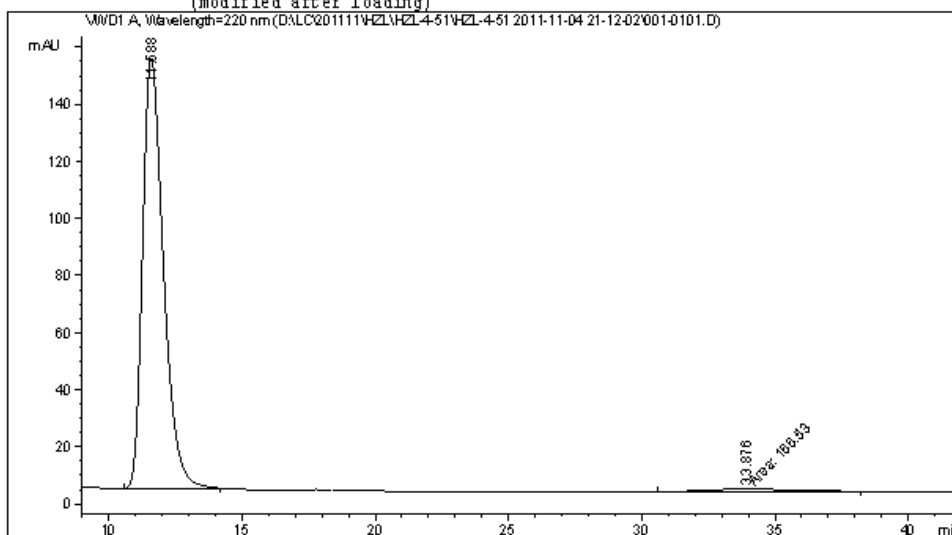

# Area Percent Report

```
Sorted By      : Signal
Multiplier     : 1.0000
Dilution       : 1.0000
Use Multiplier & Dilution Factor with ISTDs
```

Signal 1: VMD1 A, Wavelength=220 nm

| Peak # | RetTime [min] | Type | Width [min] | Area mAU *s | Height [mAU] | Area %  |
|--------|---------------|------|-------------|-------------|--------------|---------|
| 1      | 11.588        | BB   | 0.8335      | 8191.35303  | 150.73788    | 98.0075 |
| 2      | 33.876        | MM   | 3.3027      | 166.53038   | 8.40367e-1   | 1.9925  |

Totals : 8357.88341 151.57825

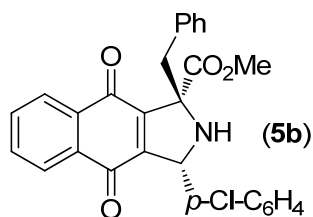

Data File D:\LC\201111\HZZ\HZZ-4-21\HZZ-4-21C 2011-10-20 20-05-18\002-0101.D  
Sample Name: HZZ-4-21C

```
=====
Acq. Operator   : HZZ                               Seq. Line :    1
Acq. Instrument : Instrument 1                       Location  : Vial 2
Injection Date  : 10/20/2011 8:07:18 PM              Inj       :    1
                                                    Inj Volume: 5 µl
Acq. Method     : D:\LC\201111\HZZ\HZZ-4-21\HZZ-4-21C 2011-10-20 20-05-18\ASH-40-60-10ML-
                  220NM.M
Last changed    : 10/20/2011 8:03:32 PM by HZZ
Analysis Method : D:\LC\201111\HZZ\HZZ-4-21\HZZ-4-21C 2011-10-20 20-05-18\002-0101.D\DA.M (
                  ASH-40-60-10ML-220NM.M)
Last changed    : 10/29/2011 3:19:44 PM by HZZ
                  (modified after loading)
=====
```

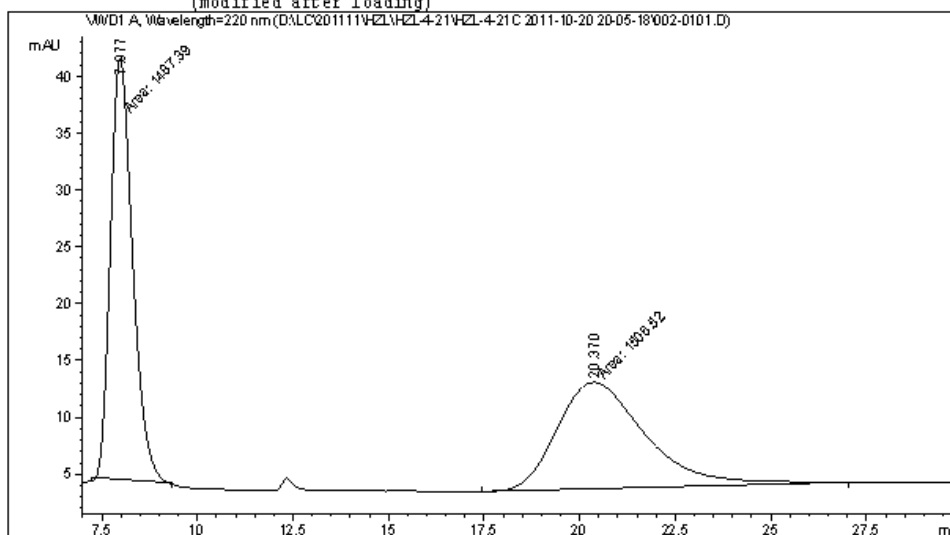

# Area Percent Report

```
Sorted By      : Signal
Multiplier     : 1.0000
Dilution       : 1.0000
Use Multiplier & Dilution Factor with ISTDs
```

Signal 1: VWD1 A, Wavelength=220 nm

| Peak # | RetTime [min] | Type | Width [min] | Area mAU *s | Height [mAU] | Area %  |
|--------|---------------|------|-------------|-------------|--------------|---------|
| 1      | 7.977         | MM   | 0.6694      | 1487.38757  | 37.03318     | 49.6805 |
| 2      | 20.370        | MM   | 2.6827      | 1506.52039  | 9.35950      | 50.3195 |

Totals : 2993.90796 46.39268

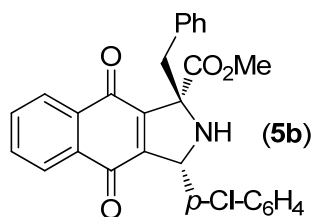

Data File D:\LC\DATA\H2L\H2L-4-64-65-66\H2L-4-64A 2011-11-14 22-42-33\035-0401.D  
Sample Name: H2L-4-66B

```
=====
Acq. Operator   : hzl                      Seq. Line :    4
Acq. Instrument : Instrument 1              Location  : Vial 35
Injection Date  : 11/14/2011 11:42:09 PM    Inj       :    1
                                           Inj Volume: 5 µl

Acq. Method     : D:\LC\201111\H2L\H2L-4-64-65-66\H2L-4-64A 2011-11-14 22-42-33\ASH-40-60-
                  10ML-220NM-30MIN.M
Last changed    : 10/31/2011 7:25:18 PM by HZL
Analysis Method : D:\LC\DATA\H2L\H2L-4-64-65-66\H2L-4-64A 2011-11-14 22-42-33\035-0401.D\DA.
                  M (ASH-40-60-10ML-220NM-30MIN.M)
Last changed    : 9/24/2012 10:07:24 AM by FX
                  (modified after loading)
=====
```

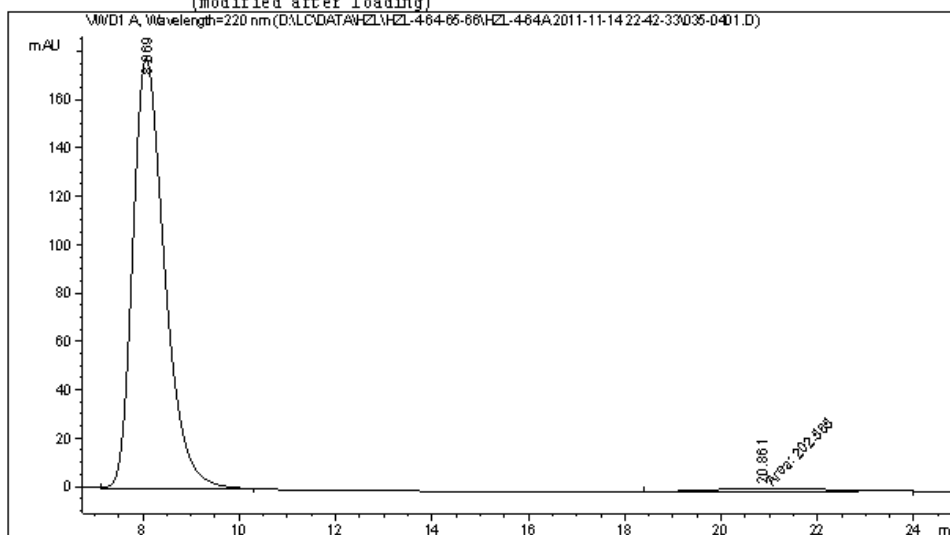

# Area Percent Report

```
Sorted By      : Signal
Multiplier     : 1.0000
Dilution       : 1.0000
Use Multiplier & Dilution Factor with ISTDs
```

Signal 1: VWD1 A, Wavelength=220 nm

| Peak # | RetTime [min] | Type | Width [min] | Area mAU *s | Height [mAU] | Area %  |
|--------|---------------|------|-------------|-------------|--------------|---------|
| 1      | 8.069         | BB   | 0.7045      | 8175.20117  | 178.06204    | 97.5821 |
| 2      | 20.861        | MM   | 2.6940      | 202.56479   | 1.25320      | 2.4179  |

Totals : 8377.76596 179.31524

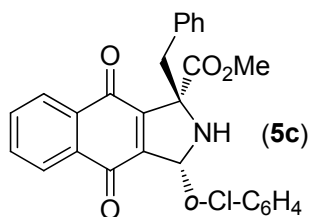

Data File D:\LC\201111\H2L\H2L-4-21\H2L-4-21A 2011-11-05 15-39-02\001-0201.D  
Sample Name: H2L-4-21A

```
=====
Acq. Operator   : HZL                      Seq. Line :    2
Acq. Instrument : Instrument 1              Location  : Vial 1
Injection Date  : 11/5/2011 3:51:26 PM      Inj       :    1
                                           Inj Volume: 5 µl
Acq. Method     : D:\LC\201111\H2L\H2L-4-21\H2L-4-21A 2011-11-05 15-39-02\ASH-30-70-10ML-
220NM.M
Last changed    : 10/20/2011 6:42:48 PM by HZL
Analysis Method : D:\LC\201111\H2L\H2L-4-21\H2L-4-21A 2011-11-05 15-39-02\001-0201.D\DA.M (
ASH-30-70-10ML-220NM.M)
Last changed    : 11/5/2011 4:34:18 PM by HZL
(modified after loading)
=====
```

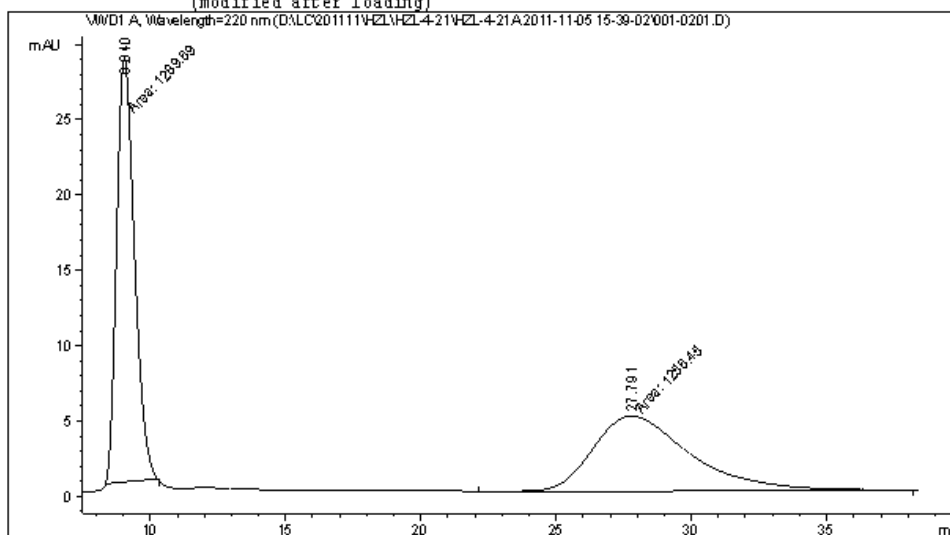

# Area Percent Report

```
Sorted By      : Signal
Multiplier     : 1.0000
Dilution       : 1.0000
Use Multiplier & Dilution Factor with ISTDs
```

Signal 1: VWD1 A, Wavelength=220 nm

| Peak # | RetTime [min] | Type | Width [min] | Area mAU *s | Height [mAU] | Area %  |
|--------|---------------|------|-------------|-------------|--------------|---------|
| 1      | 9.040         | MM   | 0.7646      | 1289.69067  | 28.11200     | 50.6529 |
| 2      | 27.791        | MM   | 4.1969      | 1256.44556  | 4.98963      | 49.3471 |

Totals : 2546.13623 33.10163



Data File D:\LC\201111\H2L\H2L-4-68A\H2L-4-68A 2011-11-17 09-55-03\001-0201.D  
Sample Name: H2L-4-68A

```
=====
Acq. Operator   : hzl                      Seq. Line :    2
Acq. Instrument : Instrument 1              Location  : Vial 1
Injection Date  : 11/17/2011 10:07:30 AM    Inj       :    1
                                           Inj Volume: 5 µl
Acq. Method     : D:\LC\201111\H2L\H2L-4-68A\H2L-4-68A 2011-11-17 09-55-03\ASH-30-70-10ML-
220NM-40MIN.M
Last changed    : 10/29/2011 2:58:53 PM by HZL
Analysis Method : D:\LC\201111\H2L\H2L-4-68A\H2L-4-68A 2011-11-17 09-55-03\001-0201.D\DA.M (
ASH-30-70-10ML-220NM-40MIN.M)
Last changed    : 11/17/2011 11:07:45 AM by hzl
(modified after loading)
=====
```

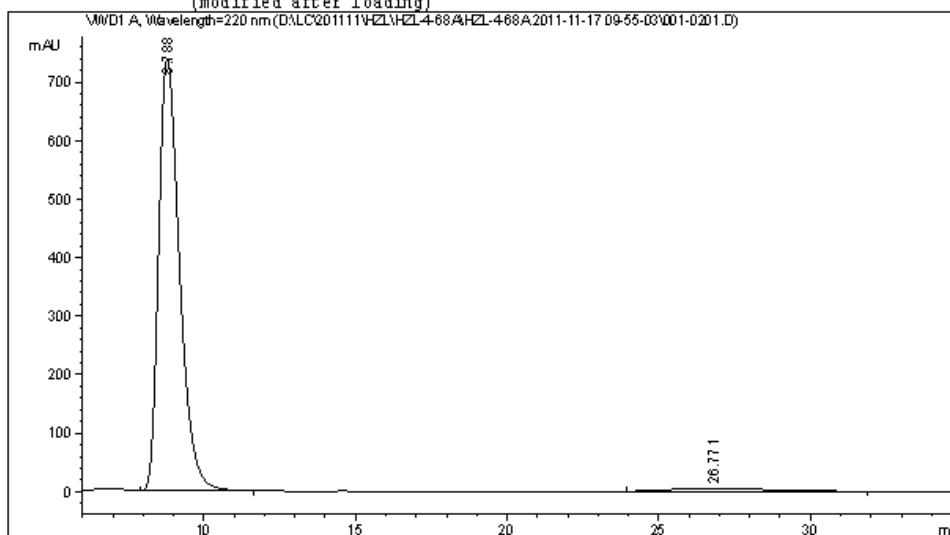

# Area Percent Report

```
Sorted By      : Signal
Multiplier     : 1.0000
Dilution       : 1.0000
Use Multiplier & Dilution Factor with ISTDs
```

Signal 1: VWD1 A, Wavelength=220 nm

| Peak # | RetTime [min] | Type | Width [min] | Area mAU *s | Height [mAU] | Area %  |
|--------|---------------|------|-------------|-------------|--------------|---------|
| 1      | 8.788         | VB   | 0.7369      | 3.53488e4   | 739.33594    | 96.8285 |
| 2      | 26.771        | BB   | 2.5743      | 1157.79492  | 5.28305      | 3.1715  |

Totals : 3.65066e4 744.61899



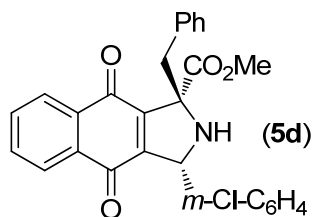

Data File D:\LC\201111\H2L\H2L-4-21B\H2L-4-21B-ASH 2011-10-25 08-59-07\052-0201.D  
Sample Name: H2L-4-21B

```
=====
Acq. Operator   : hzl                      Seq. Line :    2
Acq. Instrument : Instrument 1              Location  : Vial 52
Injection Date  : 10/25/2011 9:11:52 AM    Inj       :    1
                                           Inj Volume: 5 µl
Acq. Method     : D:\LC\201111\H2L\H2L-4-21B\H2L-4-21B-ASH 2011-10-25 08-59-07\ASH-30-70-
                  10ML-220NM.M
Last changed    : 10/20/2011 6:42:48 PM by HZL
Analysis Method : D:\LC\201111\H2L\H2L-4-21B\H2L-4-21B-ASH 2011-10-25 08-59-07\052-0201.D\
                  DA.M (ASH-30-70-10ML-220NM.M)
Last changed    : 10/29/2011 2:51:53 PM by HZL
                  (modified after loading)
=====
```

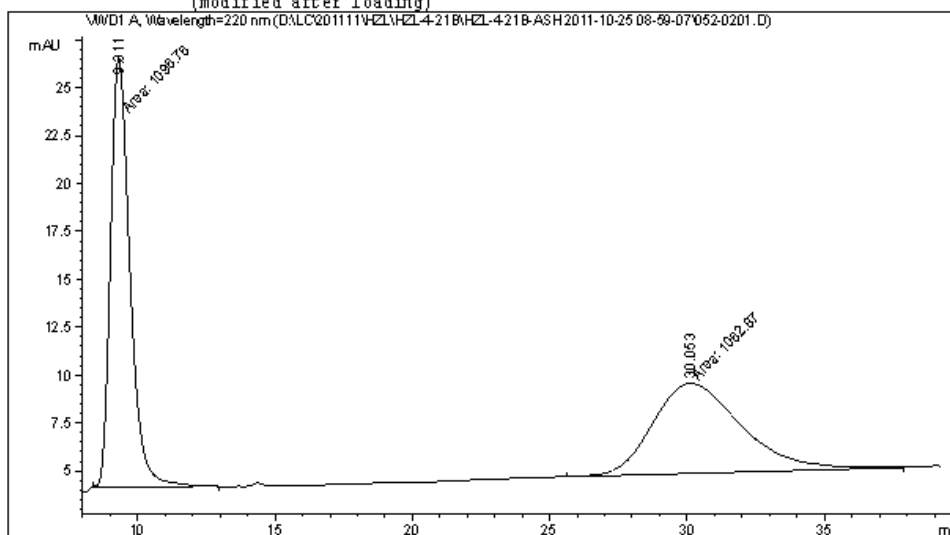

# Area Percent Report

```
Sorted By      : Signal
Multiplier     : 1.0000
Dilution       : 1.0000
Use Multiplier & Dilution Factor with ISTDs
```

Signal 1: VWD1 A, Wavelength=220 nm

| Peak # | RetTime [min] | Type | Width [min] | Area mAU *s | Height [mAU] | Area %  |
|--------|---------------|------|-------------|-------------|--------------|---------|
| 1      | 9.311         | MM   | 0.8174      | 1096.75818  | 22.36259     | 50.7846 |
| 2      | 30.053        | MM   | 3.7439      | 1062.87061  | 4.73154      | 49.2154 |

Totals : 2159.62878 27.09412

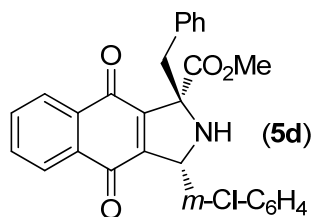

Data File D:\LC\201111\LQH\YDC-1-39\YDC-1-39 2011-11-15 11-13-34\045-0401.D  
 Sample Name: HZL-4-66A

```
=====
Acq. Operator   : LQH                      Seq. Line :    4
Acq. Instrument : Instrument 1              Location  : Vial 45
Injection Date  : 11/15/2011 12:38:40 PM    Inj       :    1
                                           Inj Volume: 5 µl
Acq. Method     : D:\LC\201111\LQH\YDC-1-39\YDC-1-39 2011-11-15 11-13-34\ASH-30-70-10ML-
                  220NM-40MIN.M
Last changed    : 10/29/2011 2:58:53 PM by HZL
Analysis Method : D:\LC\201111\LQH\YDC-1-39\YDC-1-39 2011-11-15 11-13-34\045-0401.D\DA.M (
                  ASH-30-70-10ML-220NM-40MIN.M)
Last changed    : 12/15/2011 4:58:16 PM by FX
                  (modified after loading)
=====
```

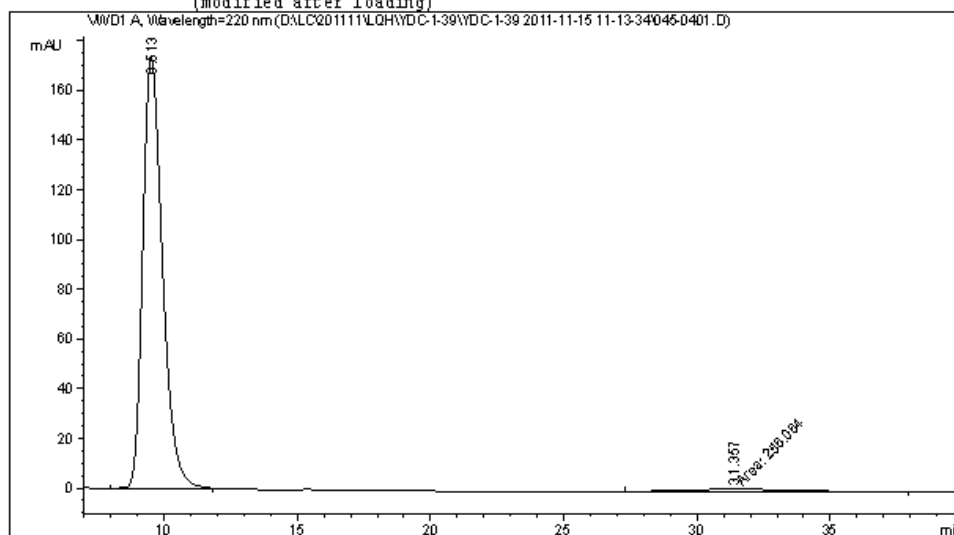

# Area Percent Report

```
Sorted By      : Signal
Multiplier     : 1.0000
Dilution       : 1.0000
Use Multiplier & Dilution Factor with ISTDs
```

Signal 1: VMD1 A, Wavelength=220 nm

| Peak # | RetTime [min] | Type | Width [min] | Area mAU   | Height [mAU] | Area %  |
|--------|---------------|------|-------------|------------|--------------|---------|
| 1      | 9.513         | VB   | 0.7973      | 8909.80176 | 173.02185    | 97.2063 |
| 2      | 31.357        | MM   | 4.3574      | 256.06387  | 9.79429e-1   | 2.7937  |

Totals : 9165.86563 174.00128

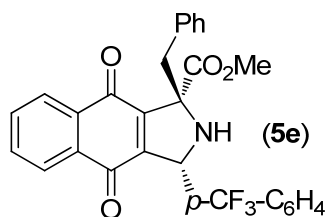

Data File D:\LC\201111\H2L\H2L-4-71\H2L-4-71B-ADH 2011-11-18 10-07-52\001-0201.D  
Sample Name: H2L-4-71B

```
=====
Acq. Operator   : hzl                      Seq. Line :    2
Acq. Instrument : Instrument 1              Location  : Vial 1
Injection Date  : 11/18/2011 10:19:43 AM    Inj       :    1
                                           Inj Volume: 5 µl
Acq. Method     : D:\LC\201111\H2L\H2L-4-71\H2L-4-71B-ADH 2011-11-18 10-07-52\ADH-30-70-
                  10ML-220NM.M
Last changed    : 9/15/2011 8:42:49 AM by THL
Analysis Method : D:\LC\201111\H2L\H2L-4-71\H2L-4-71B-ADH 2011-11-18 10-07-52\001-0201.D\DA.
                  M (ADH-30-70-10ML-220NM.M)
Last changed    : 12/15/2011 9:44:56 AM by FX
                  (modified after loading)
=====
```

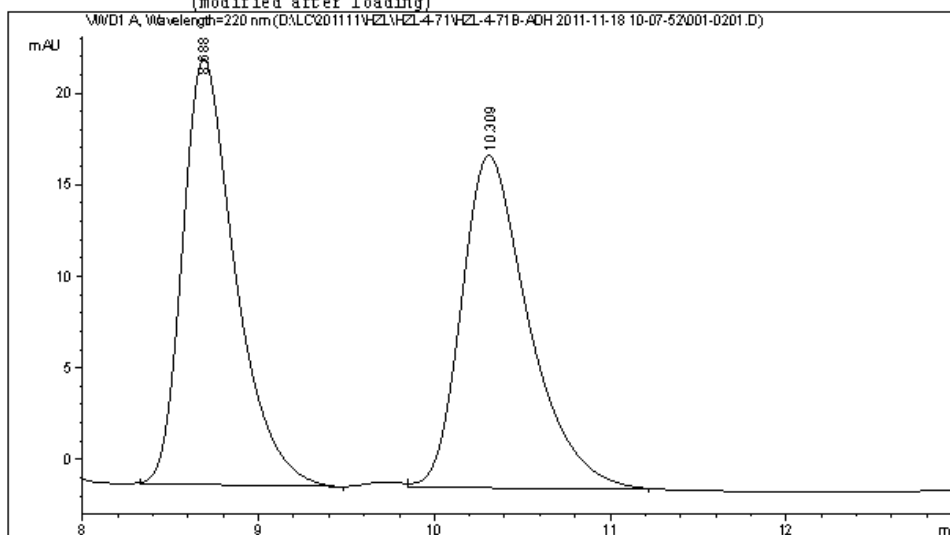

# Area Percent Report

```
Sorted By      : Signal
Multiplier     : 1.0000
Dilution       : 1.0000
Use Multiplier & Dilution Factor with ISTDs
```

Signal 1: VWD1 A, Wavelength=220 nm

| Peak # | RetTime [min] | Type | Width [min] | Area mAU *s | Height [mAU] | Area %  |
|--------|---------------|------|-------------|-------------|--------------|---------|
| 1      | 8.688         | BB   | 0.3125      | 483.74359   | 23.26646     | 50.1151 |
| 2      | 10.309        | VB   | 0.4000      | 481.52161   | 18.14019     | 49.8849 |

Totals : 965.26520 41.40665

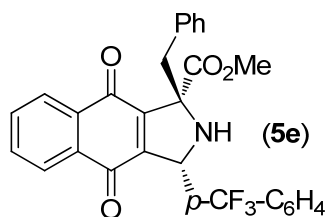

Data File D:\LC\201111\H2L\H2L-4-65C\H2L-4-65C-2 2011-12-01 10-08-27\044-0301.D  
Sample Name: H2L-4-88

```
=====
Acq. Operator   : H2L                      Seq. Line :    3
Acq. Instrument : Instrument 1              Location  : Vial 44
Injection Date  : 12/1/2011 10:42:22 AM     Inj       :    1
                                           Inj Volume: 5 µl

Acq. Method     : D:\LC\201111\H2L\H2L-4-65C\H2L-4-65C-2 2011-12-01 10-08-27\ADH-30-70-10ML-
220NM-20MIN.M
Last changed    : 11/19/2011 10:39:21 AM by THL
Analysis Method : D:\LC\201111\H2L\H2L-4-65C\H2L-4-65C-2 2011-12-01 10-08-27\044-0301.D\DA.M
(ADH-30-70-10ML-220NM-20MIN.M)
Last changed    : 12/15/2011 4:49:40 PM by FX
(modified after loading)
=====
```

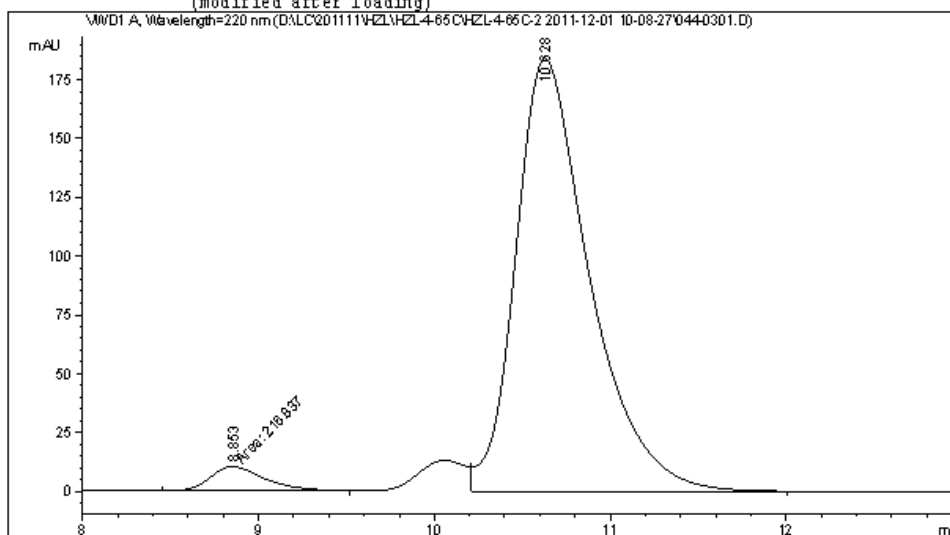

# Area Percent Report

```
Sorted By      : Signal
Multiplier     : 1.0000
Dilution       : 1.0000
Use Multiplier & Dilution Factor with ISTDs
```

Signal 1: VWD1 A, Wavelength=220 nm

| Peak # | RetTime [min] | Type | Width [min] | Area mAU *s | Height [mAU] | Area %  |
|--------|---------------|------|-------------|-------------|--------------|---------|
| 1      | 8.853         | MM   | 0.3541      | 216.83698   | 10.20610     | 3.8809  |
| 2      | 10.628        | VB   | 0.4364      | 5370.42090  | 184.09636    | 96.1191 |

Totals : 5587.25787 194.30246

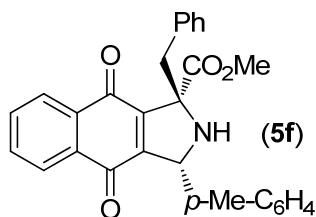

Data File D:\LC\201111\HZZ\HZZ-4-33\HZZ-4-33A 2011-10-25 16-22-38\053-0201.D  
Sample Name: HZZ-4-33A

```
=====
Acq. Operator   : hzl                      Seq. Line :    2
Acq. Instrument : Instrument 1              Location  : Vial 53
Injection Date  : 10/25/2011 4:35:14 PM    Inj       :    1
                                           Inj Volume: 5 µl
Acq. Method     : D:\LC\201111\HZZ\HZZ-4-33\HZZ-4-33A 2011-10-25 16-22-38\ASH-30-70-12ML-
220NM.M
Last changed    : 10/25/2011 4:20:13 PM by hzl
Analysis Method : D:\LC\201111\HZZ\HZZ-4-33\HZZ-4-33A 2011-10-25 16-22-38\053-0201.D\DA.M (
ASH-30-70-12ML-220NM.M)
Last changed    : 10/29/2011 3:04:44 PM by HZZ
                  (modified after loading)
=====
```

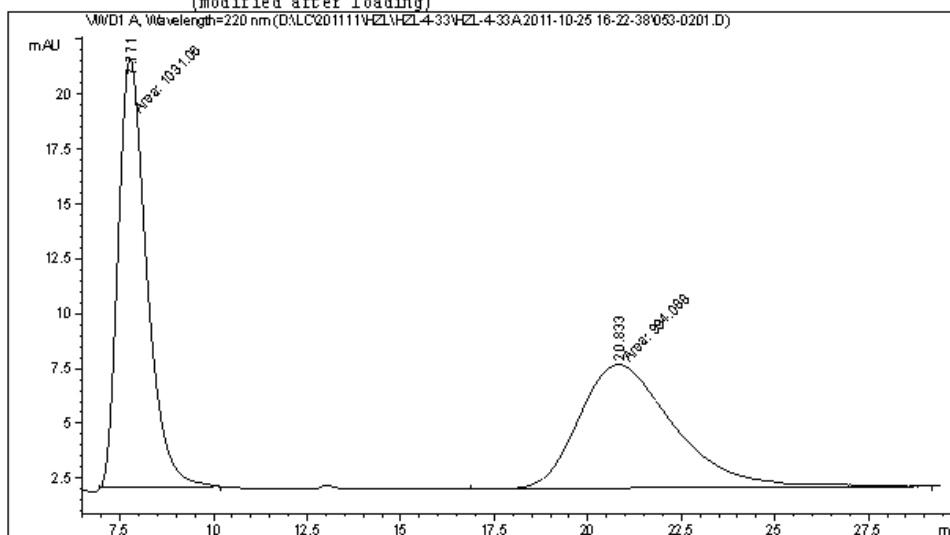

# Area Percent Report

```
Sorted By      : Signal
Multiplier     : 1.0000
Dilution       : 1.0000
Use Multiplier & Dilution Factor with ISTDs
```

Signal 1: VWD1 A, Wavelength=220 nm

| Peak # | RetTime [min] | Type | Width [min] | Area mAU *s | Height [mAU] | Area %  |
|--------|---------------|------|-------------|-------------|--------------|---------|
| 1      | 7.771         | MM   | 0.8797      | 1031.05908  | 19.53331     | 50.9128 |
| 2      | 20.833        | MM   | 2.9494      | 994.08826   | 5.61755      | 49.0872 |

Totals : 2025.14734 25.15086



Data File D:\LC\201111\XYZY\XYZY-13-78\XYZY-13-78 2011-11-08 21-28-15\041-1301.D  
Sample Name: HZL-4-59A

```

=====
Acq. Operator   : FX                      Seq. Line :   13
Acq. Instrument : Instrument 1             Location  : Vial 41
Injection Date  : 11/9/2011 8:02:49 AM     Inj       :    1
                                           Inj Volume: 5 µl
Acq. Method     : D:\LC\201111\XYZY\XYZY-13-78\XYZY-13-78 2011-11-08 21-28-15\ASH-30-70-12ML-
220NM-30MIN.M
Last changed    : 10/29/2011 3:08:59 PM by HZL
Analysis Method : D:\LC\201111\XYZY\XYZY-13-78\XYZY-13-78 2011-11-08 21-28-15\041-1301.D\DA.M (
ASH-30-70-12ML-220NM-30MIN.M)
Last changed    : 11/9/2011 2:41:59 PM by THL
(modified after loading)
=====

```

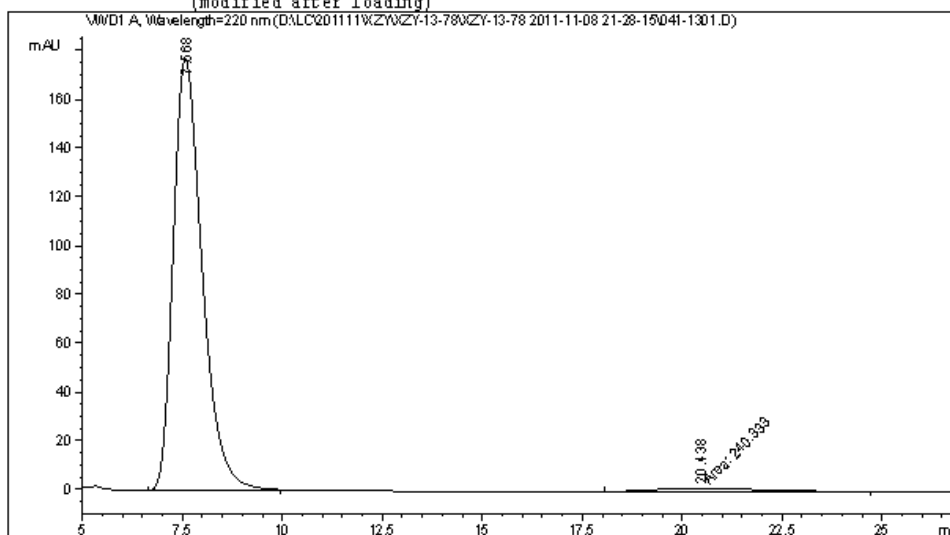

# Area Percent Report

```

Sorted By      :      Signal
Multiplier     :      1.0000
Dilution       :      1.0000
Use Multiplier & Dilution Factor with ISTDs

```

Signal 1: WVD1 A, Wavelength=220 nm

| Peak # | RetTime [min] | Type | Width [min] | Area mAU *s | Height [mAU] | Area %  |
|--------|---------------|------|-------------|-------------|--------------|---------|
| 1      | 7.568         | BB   | 0.7705      | 8895.69824  | 177.21434    | 97.3694 |
| 2      | 20.438        | MM   | 2.7972      | 240.33339   | 1.43199      | 2.6306  |

Totals : 9136.03163 178.64633

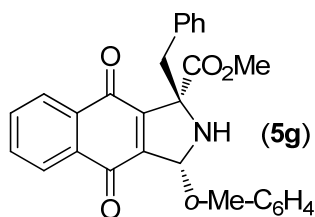

Data File D:\LC\201111\H2L\H2L-4-78\H2L-4-81B 2011-11-23 16-37-34\033-0201.D  
Sample Name: H2L-4-78A

```
=====
Acq. Operator   : HZL                      Seq. Line :    2
Acq. Instrument : Instrument 1              Location  : Vial 33
Injection Date  : 11/23/2011 4:49:34 PM    Inj       :    1
                                           Inj Volume: 5 µl
Acq. Method     : D:\LC\201111\H2L\H2L-4-78\H2L-4-81B 2011-11-23 16-37-34\0DH-30-70-10ML-
220NM.M
Last changed    : 9/14/2011 10:11:46 AM by HZL
Analysis Method : D:\LC\201111\H2L\H2L-4-78\H2L-4-81B 2011-11-23 16-37-34\033-0201.D\DA.M (
0DH-30-70-10ML-220NM.M)
Last changed    : 12/15/2011 10:07:15 AM by FX
(modified after loading)
=====
```

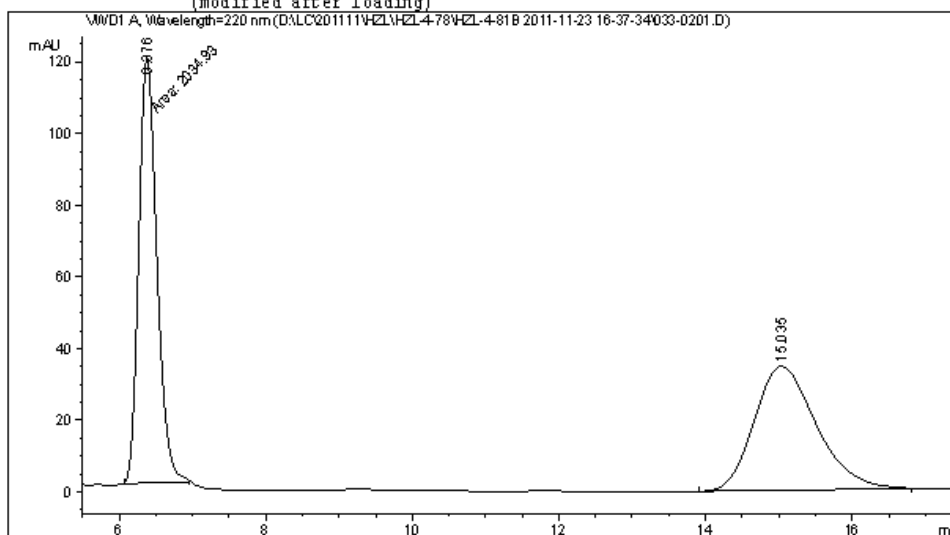

# Area Percent Report

```
Sorted By      : Signal
Multiplier     : 1.0000
Dilution       : 1.0000
Use Multiplier & Dilution Factor with ISTDs
```

Signal 1: VWD1 A, Wavelength=220 nm

| Peak # | RetTime [min] | Type | Width [min] | Area mAU *s | Height [mAU] | Area %  |
|--------|---------------|------|-------------|-------------|--------------|---------|
| 1      | 6.376         | MM   | 0.2861      | 2034.92603  | 118.52831    | 49.8982 |
| 2      | 15.035        | BB   | 0.9118      | 2043.22571  | 34.59540     | 50.1018 |

Totals : 4078.15173 153.12370



Data File D:\LC\201111\H2L\H2L-4-80\H2L-4-80A 2011-11-24 16-10-19\037-0201.D  
Sample Name: H2L-4-80A

```
=====
Acq. Operator   : HZL                      Seq. Line :    2
Acq. Instrument : Instrument 1              Location  : Vial 37
Injection Date  : 11/24/2011 4:22:20 PM    Inj       :    1
                                           Inj Volume: 5 µl
Acq. Method     : D:\LC\201111\H2L\H2L-4-80\H2L-4-80A 2011-11-24 16-10-19\0DH-30-70-10ML-
                  220NM-20MIN.M
Last changed    : 11/24/2011 3:51:31 PM by HZL
Analysis Method : D:\LC\201111\H2L\H2L-4-80\H2L-4-80A 2011-11-24 16-10-19\037-0201.D\DA.M (
                  0DH-30-70-10ML-220NM-20MIN.M)
Last changed    : 12/15/2011 10:09:25 AM by FX
                  (modified after loading)
=====
```

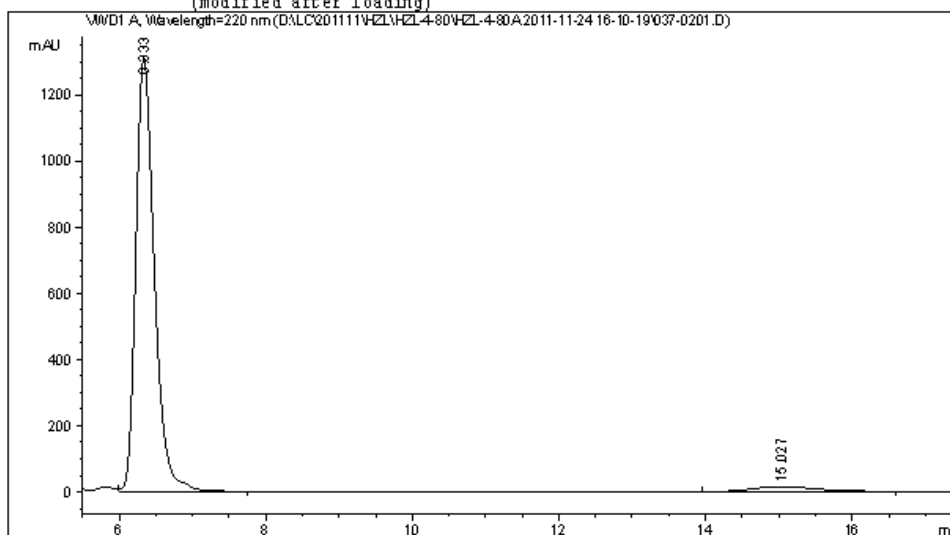

# Area Percent Report

```
Sorted By      : Signal
Multiplier     : 1.0000
Dilution       : 1.0000
Use Multiplier & Dilution Factor with ISTDs
```

Signal 1: VWD1 A, Wavelength=220 nm

| Peak # | RetTime [min] | Type | Width [min] | Area mAU *s | Height [mAU] | Area %  |
|--------|---------------|------|-------------|-------------|--------------|---------|
| 1      | 6.333         | VB   | 0.2688      | 2.29704e4   | 1308.67627   | 96.3848 |
| 2      | 15.027        | BB   | 0.8856      | 861.57837   | 14.93419     | 3.6152  |

Totals : 2.38320e4 1323.61046



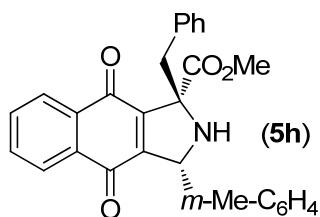

Data File D:\LC\DATA\H2L\H2L-4-78\H2L-4-78B-1 2012-09-24 10-39-13\002-0101.D  
Sample Name: H2L-4-78B

```
=====
Acq. Operator   : FX                               Seq. Line :    1
Acq. Instrument : Instrument 1                     Location  : Vial 2
Injection Date  : 9/24/2012 10:40:38 AM            Inj       :    1
                                                    Inj Volume: 5 µl
Acq. Method     : D:\LC\DATA\H2L\H2L-4-78\H2L-4-78B-1 2012-09-24 10-39-13\ASH-30-70-1ML-
220NM.M
Last changed    : 1/13/2012 10:19:59 AM by LOH
Analysis Method : D:\LC\DATA\H2L\H2L-4-78\H2L-4-78B-1 2012-09-24 10-39-13\002-0101.D\DA.M (
ASH-30-70-1ML-220NM.M)
Last changed    : 9/24/2012 11:21:06 AM by FX
                  (modified after loading)
Method Info     : ASH-50-50-1ML-254NM-50MIN
=====
```

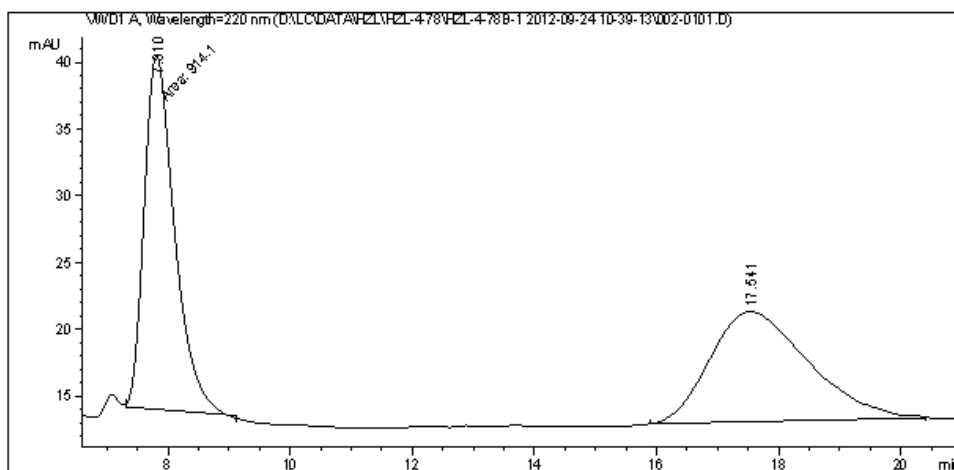

```
=====
                          Area Percent Report
=====
```

```
Sorted By      :      Signal
Multiplier     :      1.0000
Dilution       :      1.0000
Use Multiplier & Dilution Factor with ISTDs
```

Signal 1: VMD1 A, Wavelength=220 nm

| Peak # | RetTime [min] | Type | Width [min] | Area mAU  | Height [mAU] | Area %  |
|--------|---------------|------|-------------|-----------|--------------|---------|
| 1      | 7.810         | MM   | 0.5742      | 914.09973 | 26.53284     | 49.7468 |
| 2      | 17.541        | BB   | 1.3159      | 923.40363 | 8.26015      | 50.2532 |

```
Totals :                      1837.50336  34.79298
```

```
=====
*** End of Report ***
```



Data File D:\LC\201111\H2L\H2L-4-80\H2L-4-80B 2011-11-22 20-43-40\013-0101.D  
Sample Name: H2L-4-80B

```
=====
Acq. Operator   : H2L                      Seq. Line :    1
Acq. Instrument : Instrument 1              Location  : Vial 13
Injection Date  : 11/22/2011 8:44:57 PM    Inj       :    1
                                           Inj Volume: 5 µl
Acq. Method     : D:\LC\201111\H2L\H2L-4-80\H2L-4-80B 2011-11-22 20-43-40\ASH-30-70-10ML-
220NM-30MIN.M
Last changed    : 11/22/2011 8:35:29 PM by THL
Analysis Method : D:\LC\201111\H2L\H2L-4-80\H2L-4-80B 2011-11-22 20-43-40\013-0101.D\DA.M (
ASH-30-70-10ML-220NM-30MIN.M)
Last changed    : 12/15/2011 10:16:49 AM by FX
                  (modified after loading)
=====
```

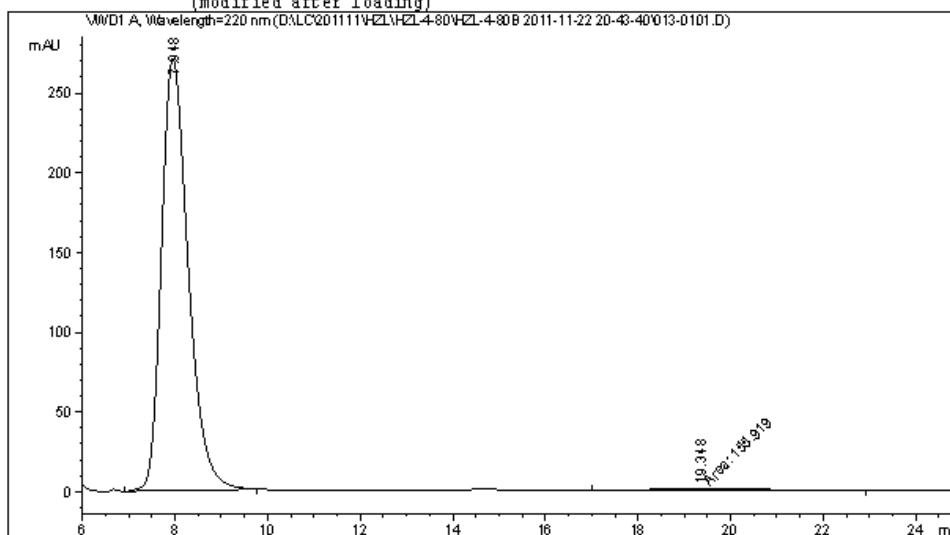

# Area Percent Report

```
Sorted By      : Signal
Multiplier     : 1.0000
Dilution       : 1.0000
Use Multiplier & Dilution Factor with ISTDs
```

Signal 1: VWD1 A, Wavelength=220 nm

| Peak # | RetTime [min] | Type | Width [min] | Area mAU *s | Height [mAU] | Area %  |
|--------|---------------|------|-------------|-------------|--------------|---------|
| 1      | 7.948         | VB   | 0.6202      | 1.09292e4   | 271.14075    | 98.5934 |
| 2      | 19.348        | MM   | 2.3333      | 155.91867   | 1.11373      | 1.4066  |

Totals : 1.10851e4 272.25447

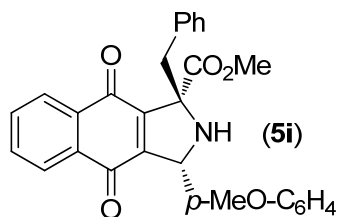

Data File D:\LC\201111\HZZ\HZZ-4-33\HZZ-4-33B 2011-10-26 09-59-15\054-0201.D  
Sample Name: HZZ-4-33B

```

=====
Acq. Operator   : HZZ                               Seq. Line :    2
Acq. Instrument : Instrument 1                       Location  : Vial 54
Injection Date  : 10/26/2011 10:11:44 AM             Inj       :    1
                                                    Inj Volume: 5 µl
Acq. Method     : D:\LC\201111\HZZ\HZZ-4-33\HZZ-4-33B 2011-10-26 09-59-15\ASH-30-70-12ML-
220NM.M
Last changed    : 10/25/2011 4:20:13 PM by hzz
Analysis Method : D:\LC\201111\HZZ\HZZ-4-33\HZZ-4-33B 2011-10-26 09-59-15\054-0201.D\DA.M (
ASH-30-70-12ML-220NM.M)
Last changed    : 10/29/2011 3:28:05 PM by HZZ
(modified after loading)
=====

```

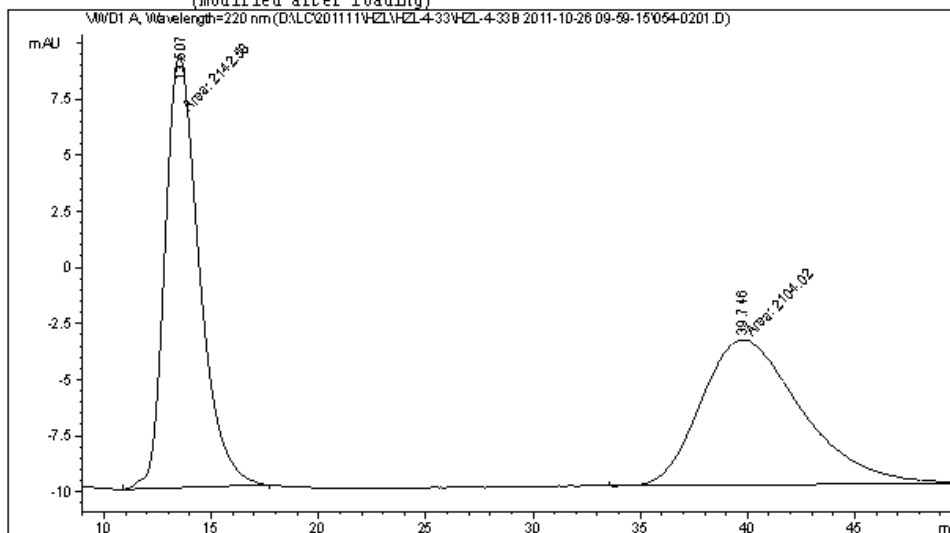

# Area Percent Report

```

Sorted By      : Signal
Multiplier     : 1.0000
Dilution       : 1.0000
Use Multiplier & Dilution Factor with ISTDs

```

Signal 1: VWD1 A, Wavelength=220 nm

| Peak # | RetTime [min] | Type | Width [min] | Area mAU *s | Height [mAU] | Area %  |
|--------|---------------|------|-------------|-------------|--------------|---------|
| 1      | 13.507        | MM   | 1.8584      | 2142.58325  | 19.21558     | 50.4540 |
| 2      | 39.746        | MM   | 5.4205      | 2104.02490  | 6.46932      | 49.5460 |

Totals : 4246.60815 25.68490

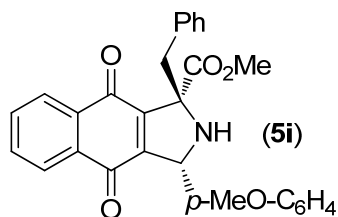

Data File D:\LC\201111\HZZ\HZZ-4-59\HZZ-4-59B 2011-11-11 20-29-35\024-0101.D  
Sample Name: HZZ-4-59B

```
=====
Acq. Operator   : HZZ                               Seq. Line :    1
Acq. Instrument : Instrument 1                       Location  : Vial 24
Injection Date  : 11/11/2011 8:30:54 PM              Inj       :    1
                                                    Inj Volume: 5 µl
Acq. Method     : D:\LC\201111\HZZ\HZZ-4-59\HZZ-4-59B 2011-11-11 20-29-35\ASH-30-70-12ML-
220NM-50MIN.M
Last changed    : 10/29/2011 3:52:23 PM by HZZ
Analysis Method : D:\LC\201111\HZZ\HZZ-4-59\HZZ-4-59B 2011-11-11 20-29-35\024-0101.D\DA.M (
ASH-30-70-12ML-220NM-50MIN.M)
Last changed    : 11/11/2011 9:30:27 PM by THL
(modified after loading)
=====
```

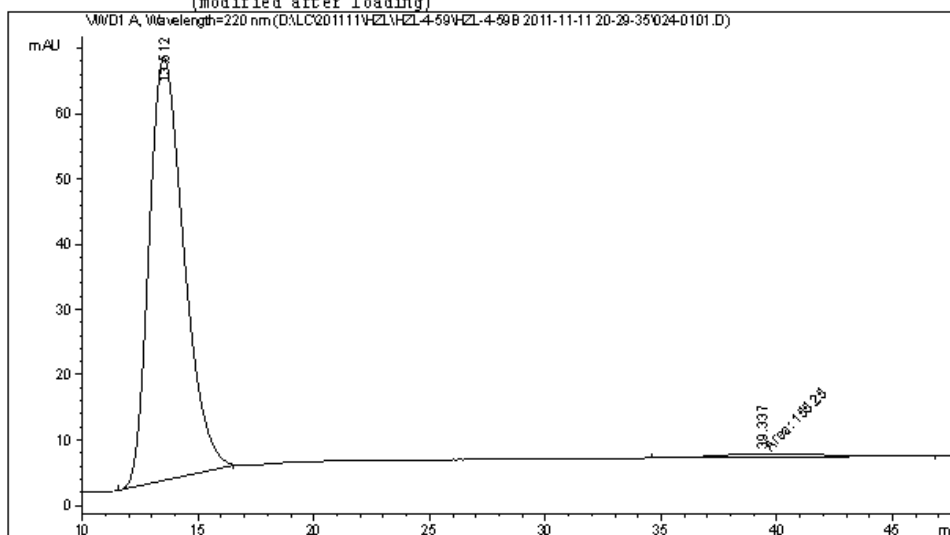

=====  
Area Percent Report  
=====

```
Sorted By      : Signal
Multiplier     : 1.0000
Dilution       : 1.0000
Use Multiplier & Dilution Factor with ISTDs
```

Signal 1: VWD1 A, Wavelength=220 nm

| Peak # | RetTime [min] | Type | Width [min] | Area mAU *s | Height [mAU] | Area %  |
|--------|---------------|------|-------------|-------------|--------------|---------|
| 1      | 13.512        | BB   | 1.6053      | 6780.93555  | 64.64053     | 97.7617 |
| 2      | 39.337        | MM   | 4.9252      | 155.24968   | 5.25358e-1   | 2.2383  |

Totals : 6936.18523 65.16589

Instrument 1 11/11/2011 9:30:38 PM THL

Page 1 of 1

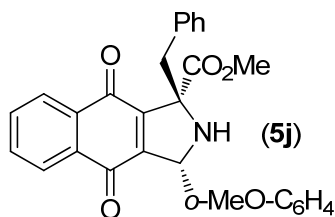

Data File D:\LC\201111\H2L\H2L-4-81\H2L-4-81B 2011-11-23 15-46-56\032-0101.D  
Sample Name: H2L-4-81B

```
=====
Acq. Operator   : HZL                      Seq. Line :    1
Acq. Instrument : Instrument 1              Location  : Vial 32
Injection Date  : 11/23/2011 3:48:45 PM     Inj       :    1
                                           Inj Volume: 5 µl
Acq. Method     : D:\LC\201111\H2L\H2L-4-81\H2L-4-81B 2011-11-23 15-46-56\ASH-30-70-10ML-
220NM.M
Last changed    : 10/20/2011 6:42:48 PM by HZL
Analysis Method : D:\LC\201111\H2L\H2L-4-81\H2L-4-81B 2011-11-23 15-46-56\032-0101.D\DA.M (
ASH-30-70-10ML-220NM.M)
Last changed    : 12/15/2011 10:22:14 AM by FX
                  (modified after loading)
=====
```

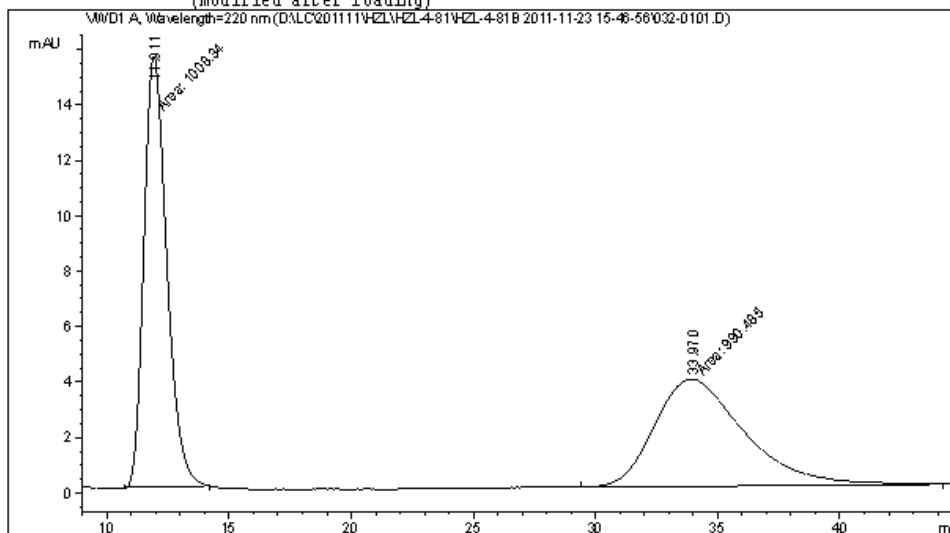

# Area Percent Report

```
Sorted By      : Signal
Multiplier     : 1.0000
Dilution       : 1.0000
Use Multiplier & Dilution Factor with ISTDs
```

Signal 1: VWD1 A, Wavelength=220 nm

| Peak # | RetTime [min] | Type | Width [min] | Area mAU *s | Height [mAU] | Area %  |
|--------|---------------|------|-------------|-------------|--------------|---------|
| 1      | 11.911        | MM   | 1.0821      | 1008.33783  | 15.53055     | 50.4466 |
| 2      | 33.970        | MM   | 4.2712      | 990.48456   | 3.86496      | 49.5534 |

Totals : 1998.82239 19.39551



Data File D:\LC\201111\FX\FX-4-123\THL-12-33 2011-11-24 12-09-47\035-0401.D  
 Sample Name: HZL-4-83A

```
=====
Acq. Operator   : FX                               Seq. Line :    4
Acq. Instrument : Instrument 1                     Location  : Vial 35
Injection Date  : 11/24/2011 12:55:19 PM           Inj       :    1
                                                    Inj Volume: 5 µl
Acq. Method     : D:\LC\201111\FX\FX-4-123\THL-12-33 2011-11-24 12-09-47\ASH-30-70-10ML-
                  220NM-45MIN.M
Last changed    : 11/24/2011 12:08:10 PM by hzl
Analysis Method : D:\LC\201111\FX\FX-4-123\THL-12-33 2011-11-24 12-09-47\035-0401.D\DA.M (
                  ASH-30-70-10ML-220NM-45MIN.M)
Last changed    : 11/24/2011 2:27:08 PM by hzl
                  (modified after loading)
=====
```

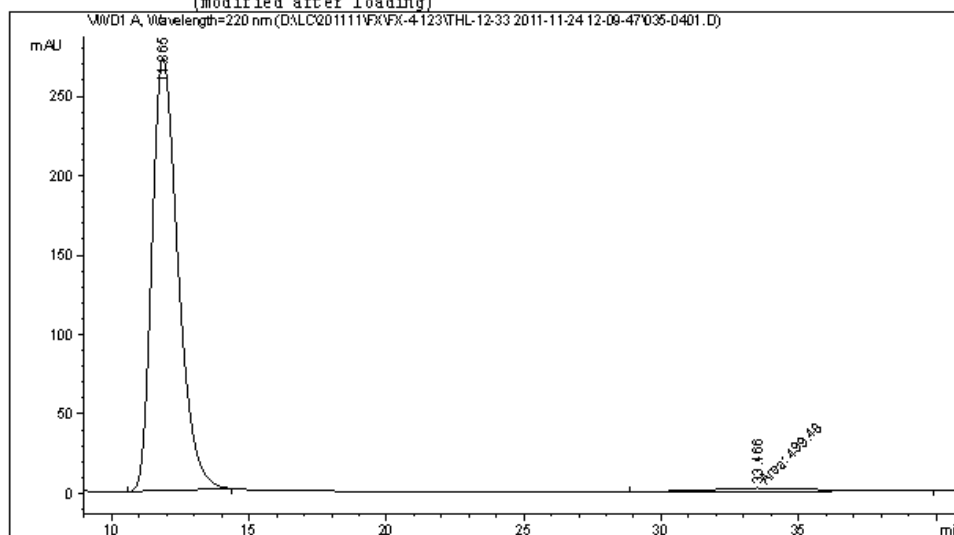

# Area Percent Report

```
Sorted By      : Signal
Multiplier     : 1.0000
Dilution       : 1.0000
Use Multiplier & Dilution Factor with ISTDs
```

Signal 1: VMD1 A, Wavelength=220 nm

| Peak # | RetTime [min] | Type | Width [min] | Area mAU *s | Height [mAU] | Area %  |
|--------|---------------|------|-------------|-------------|--------------|---------|
| 1      | 11.865        | BB   | 1.0140      | 1.79072e4   | 272.05200    | 97.2864 |
| 2      | 33.466        | MM   | 4.0919      | 499.47961   | 2.03443      | 2.7136  |

Totals : 1.84067e4 274.08644

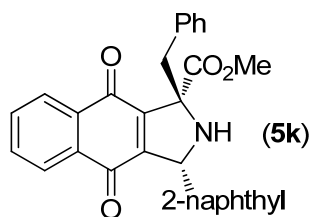

Data File D:\LC\201111\H2L\H2L-4-81\H2L-4-81A 2011-11-23 14-54-38\031-0201.D  
Sample Name: H2L-4-81A

```
=====
Acq. Operator   : H2L                      Seq. Line :    2
Acq. Instrument : Instrument 1              Location  : Vial 31
Injection Date  : 11/23/2011 3:07:03 PM    Inj       :    1
                                           Inj Volume: 5 µl
Acq. Method     : D:\LC\201111\H2L\H2L-4-81\H2L-4-81A 2011-11-23 14-54-38\ASH-30-70-10ML-
220NM.M
Last changed    : 10/20/2011 6:42:48 PM by H2L
Analysis Method : D:\LC\201111\H2L\H2L-4-81\H2L-4-81A 2011-11-23 14-54-38\031-0201.D\DA.M (
ASH-30-70-10ML-220NM.M)
Last changed    : 11/23/2011 3:49:03 PM by h2l
                  (modified after loading)
=====
```

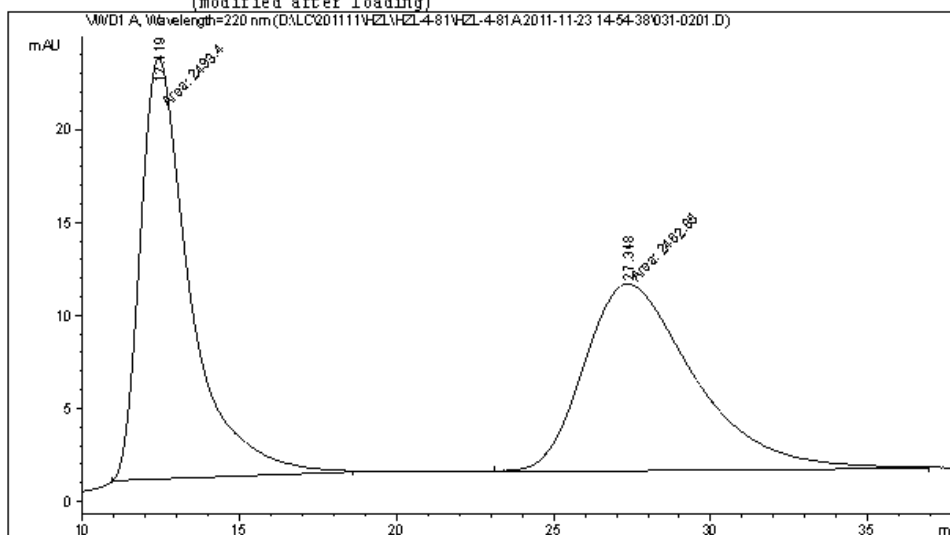

# Area Percent Report

```
Sorted By      : Signal
Multiplier     : 1.0000
Dilution       : 1.0000
Use Multiplier & Dilution Factor with ISTDs
```

Signal 1: VWD1 A, Wavelength=220 nm

| Peak # | RetTime [min] | Type | Width [min] | Area mAU *s | Height [mAU] | Area %  |
|--------|---------------|------|-------------|-------------|--------------|---------|
| 1      | 12.419        | MM   | 1.8377      | 2493.40479  | 22.61336     | 50.3082 |
| 2      | 27.348        | MM   | 4.0914      | 2462.84985  | 10.03253     | 49.6918 |

Totals : 4956.25464 32.64589

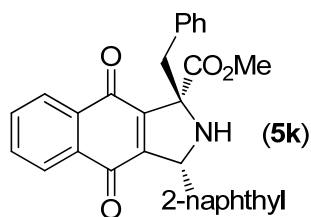

Data File D:\LC\201111\TMC\TMC-6-102\TMC-6-102 2011-12-03 11-25-45\003-0501.D  
Sample Name: HZL-4-95C

```
=====
Acq. Operator   : TMC                      Seq. Line :    5
Acq. Instrument : Instrument 1              Location  : Vial 3
Injection Date  : 12/3/2011 12:52:22 PM    Inj       :    1
                                           Inj Volume: 5 µl
Acq. Method     : D:\LC\201111\TMC\TMC-6-102\TMC-6-102 2011-12-03 11-25-45\ASH-30-70-10ML-
                                           220NM-40MIN.M
Last changed    : 10/29/2011 2:58:53 PM by HZL
Analysis Method : D:\LC\201111\TMC\TMC-6-102\TMC-6-102 2011-12-03 11-25-45\003-0501.D\DA.M (
                                           ASH-30-70-10ML-220NM-40MIN.M)
Last changed    : 12/3/2011 3:15:56 PM by LQH
                                           (modified after loading)
=====
```

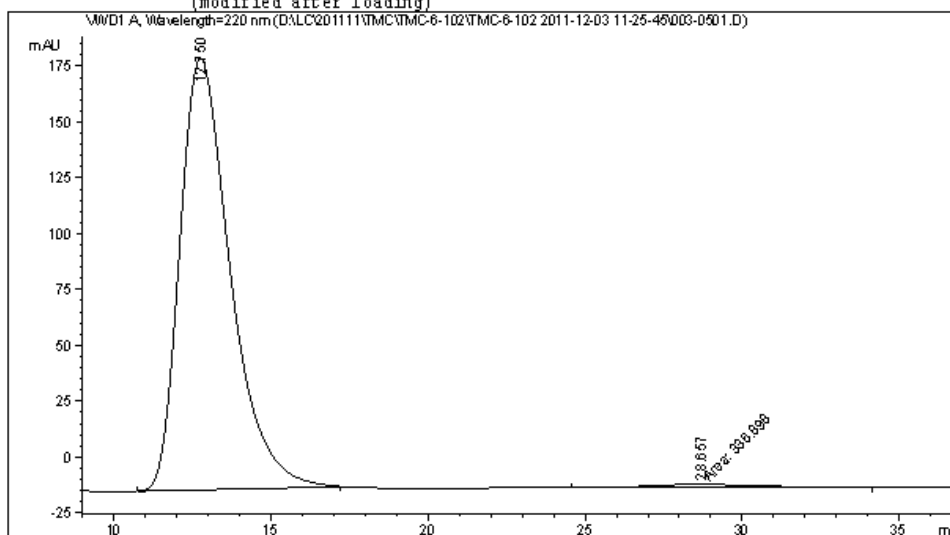

# Area Percent Report

```
Sorted By      : Signal
Multiplier     : 1.0000
Dilution       : 1.0000
Use Multiplier & Dilution Factor with ISTDs
```

Signal 1: VWD1 A, Wavelength=220 nm

| Peak # | RetTime [min] | Type | Width [min] | Area mAU *s | Height [mAU] | Area %  |
|--------|---------------|------|-------------|-------------|--------------|---------|
| 1      | 12.750        | BB   | 1.6962      | 2.15630e4   | 193.26617    | 98.4616 |
| 2      | 28.657        | MM   | 4.0378      | 336.89764   | 1.39061      | 1.5384  |

Totals : 2.18999e4 194.65679



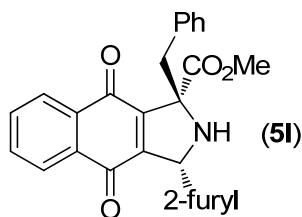

Data File D:\LC\DATA\H2L\H2L-4-38\H2L-4-38 2011-11-07 15-55-58\032-0201.D  
 Sample Name: H2L-4-38A

```
=====
Acq. Operator   : H2L                      Seq. Line :    2
Acq. Instrument : Instrument 1              Location  : Vial 32
Injection Date  : 11/7/2011 4:08:24 PM      Inj       :    1
                                           Inj Volume: 5 µl

Acq. Method     : D:\LC\201111\H2L\H2L-4-38\H2L-4-38 2011-11-07 15-55-58\ASH-30-70-10ML-
                  220NM.M
Last changed    : 10/20/2011 6:42:48 PM by H2L
Analysis Method : D:\LC\DATA\H2L\H2L-4-38\H2L-4-38 2011-11-07 15-55-58\032-0201.D\DA.M (ASH-
                  30-70-10ML-220NM.M)
Last changed    : 9/24/2012 10:00:52 AM by FX
                  (modified after loading)
=====
```

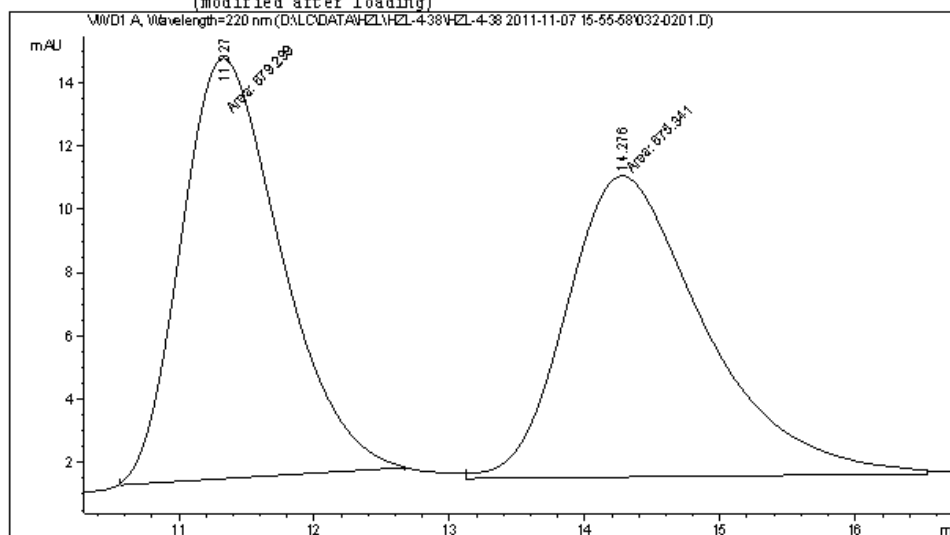

# Area Percent Report

```
Sorted By      : Signal
Multiplier     : 1.0000
Dilution       : 1.0000
Use Multiplier & Dilution Factor with ISTDs
```

Signal 1: VMD1 A, Wavelength=220 nm

| Peak # | RetTime [min] | Type | Width [min] | Area mAU *s | Height [mAU] | Area %  |
|--------|---------------|------|-------------|-------------|--------------|---------|
| 1      | 11.327        | MM   | 0.8527      | 679.29883   | 13.27685     | 50.1461 |
| 2      | 14.276        | MM   | 1.1835      | 675.34106   | 9.51031      | 49.8539 |

Totals : 1354.63989 22.78717



Data File D:\LC\201111\H2L\H2L-4-68A\H2L-4-68A 2011-11-17 09-55-03\002-0301.D  
Sample Name: H2L-4-68B

```
=====
Acq. Operator   : hzl                      Seq. Line :    3
Acq. Instrument : Instrument 1              Location  : Vial 2
Injection Date  : 11/17/2011 10:49:23 AM    Inj       :    1
                                           Inj Volume: 5 µl
Acq. Method     : D:\LC\201111\H2L\H2L-4-68A\H2L-4-68A 2011-11-17 09-55-03\ASH-30-70-10ML-
220NM-20MIN.M
Last changed    : 11/10/2011 9:40:34 PM by THL
Analysis Method : D:\LC\201111\H2L\H2L-4-68A\H2L-4-68A 2011-11-17 09-55-03\002-0301.D\DA.M (
ASH-30-70-10ML-220NM-20MIN.M)
Last changed    : 11/17/2011 11:18:16 AM by hzl
                  (modified after loading)
Method Info     : ASH-50-50-1ML-254NM-50MIN
=====
```

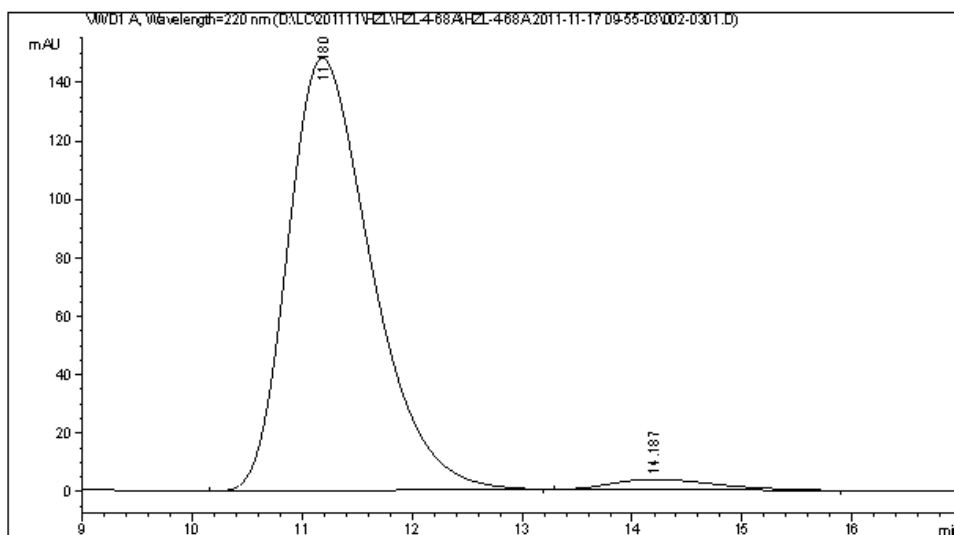

```
=====
                        Area Percent Report
=====
```

```
Sorted By      : Signal
Multiplier     : 1.0000
Dilution       : 1.0000
Use Multiplier & Dilution Factor with ISTDs
```

Signal 1: VMD1 A, Wavelength=220 nm

| Peak # | RetTime [min] | Type | Width [min] | Area mAU   | Area %  | Height [mAU] |
|--------|---------------|------|-------------|------------|---------|--------------|
| 1      | 11.180        | VB   | 0.8114      | 7800.07568 | 97.0599 | 148.01219    |
| 2      | 14.187        | BB   | 0.8576      | 236.27974  | 2.9401  | 3.60615      |

Totals : 8036.35542 151.61835

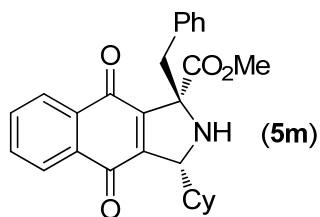

Data File D:\LC\DATA\H2L\H2L-4-123\H2L-4-123-2 2011-12-29 19-50-11\041-0101.D  
 Sample Name: H2L-4-123

```
=====
Acq. Operator   : H2L                      Seq. Line :    1
Acq. Instrument : Instrument 1              Location  : Vial 41
Injection Date  : 12/29/2011 7:51:00 PM     Inj       :    1
                                           Inj Volume: 5 µl
Acq. Method     : D:\LC\201112\H2L\H2L-4-123\H2L-4-123-2 2011-12-29 19-50-11\ASH-20-80-10ML-
                  220NM.M
Last changed    : 8/29/2011 3:56:33 PM by H2L
Analysis Method : D:\LC\DATA\H2L\H2L-4-123\H2L-4-123-2 2011-12-29 19-50-11\041-0101.D\DA.M (
                  ASH-20-80-10ML-220NM.M)
Last changed    : 9/24/2012 9:58:45 AM by FX
                  (modified after loading)
=====
```

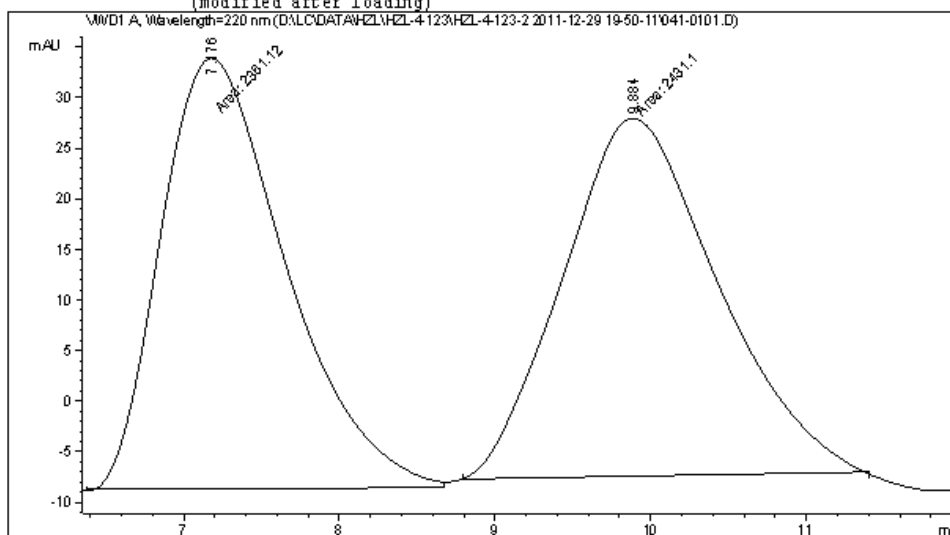

# Area Percent Report

```
Sorted By      : Signal
Multiplier     : 1.0000
Dilution       : 1.0000
Use Multiplier & Dilution Factor with ISTDs
```

Signal 1: VWD1 A, Wavelength=220 nm

| Peak # | RetTime [min] | Type | Width [min] | Area mAU *s | Height [mAU] | Area %  |
|--------|---------------|------|-------------|-------------|--------------|---------|
| 1      | 7.176         | MM   | 0.9249      | 2361.12451  | 42.54876     | 49.2699 |
| 2      | 9.884         | MM   | 1.1467      | 2431.10254  | 35.33603     | 50.7301 |

Totals : 4792.22705 77.88478

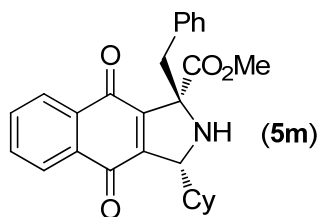

Data File D:\LC\201112\THL\THL-12-101B\THL-12-101B 2012-01-03 11-26-41\044-0501.D  
Sample Name: HZL-4-129

```
=====
Acq. Operator   : THL                      Seq. Line :    5
Acq. Instrument : Instrument 1              Location  : Vial 44
Injection Date  : 1/3/2012 1:22:49 PM      Inj       :    1
                                           Inj Volume: 5 µl
Acq. Method     : D:\LC\201112\THL\THL-12-101B\THL-12-101B 2012-01-03 11-26-41\ASH-20-80-
                  10ML-220NM-15MIN.M
Last changed    : 12/15/2011 4:27:37 PM by FX
Analysis Method : D:\LC\201112\THL\THL-12-101B\THL-12-101B 2012-01-03 11-26-41\044-0501.D\
                  DA.M (ASH-20-80-10ML-220NM-15MIN.M)
Last changed    : 1/3/2012 2:52:14 PM by LQH
                  (modified after loading)
=====
```

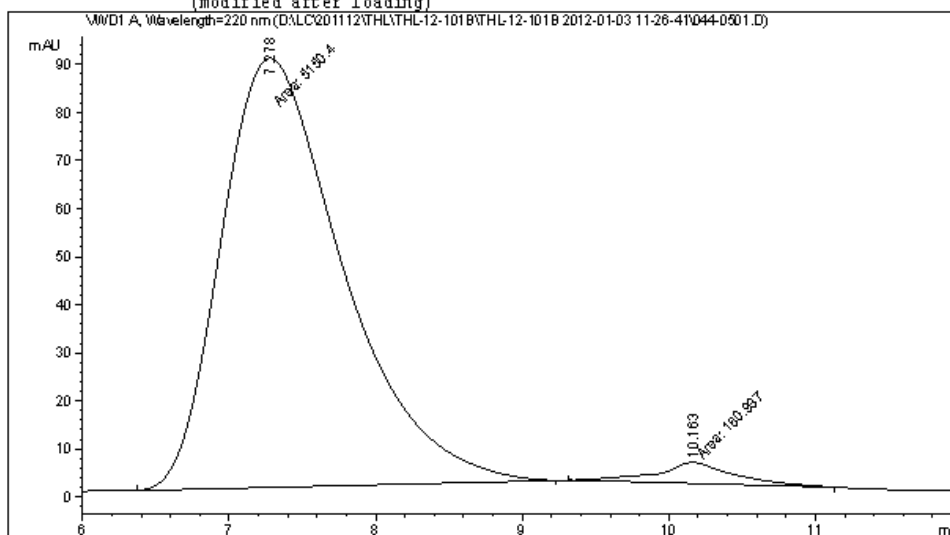

# Area Percent Report

```
Sorted By      : Signal
Multiplier     : 1.0000
Dilution       : 1.0000
Use Multiplier & Dilution Factor with ISTDs
```

Signal 1: VWD1 A, Wavelength=220 nm

| Peak # | RetTime [min] | Type | Width [min] | Area mAU   | Area %  | Height [mAU] |
|--------|---------------|------|-------------|------------|---------|--------------|
| 1      | 7.278         | MM   | 0.9613      | 5150.39746 | 96.9699 | 89.29688     |
| 2      | 10.163        | MM   | 0.6137      | 160.93723  | 3.0301  | 4.37035      |

Totals : 5311.33469 93.66722

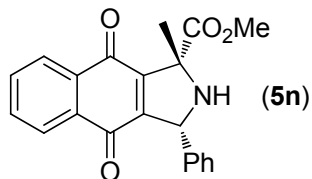

Data File D:\LC\201110\H2L\H2L-3-106\H2L-3-106A-ODH 2011-09-08 16-13-53\001-0201.D  
 Sample Name: H2L-3-106A

```
=====
Acq. Operator   : H2L                      Seq. Line :    2
Acq. Instrument : Instrument 1              Location  : Vial 1
Injection Date  : 9/8/2011 4:25:43 PM      Inj       :    1
                                           Inj Volume: 5 µl
Acq. Method     : D:\LC\H2L\Data\H2L-3-106\H2L-3-106A-ODH 2011-09-08 16-13-53\ODH-20-80-
                                           10ML-220NM.M
Last changed    : 9/8/2011 4:11:48 PM by H2L
Analysis Method : D:\LC\201110\H2L\H2L-3-106\H2L-3-106A-ODH 2011-09-08 16-13-53\001-0201.D\
                                           DA.M (ODH-20-80-10ML-220NM.M)
Last changed    : 11/8/2011 5:11:36 PM by THL
                                           (modified after loading)
=====
```

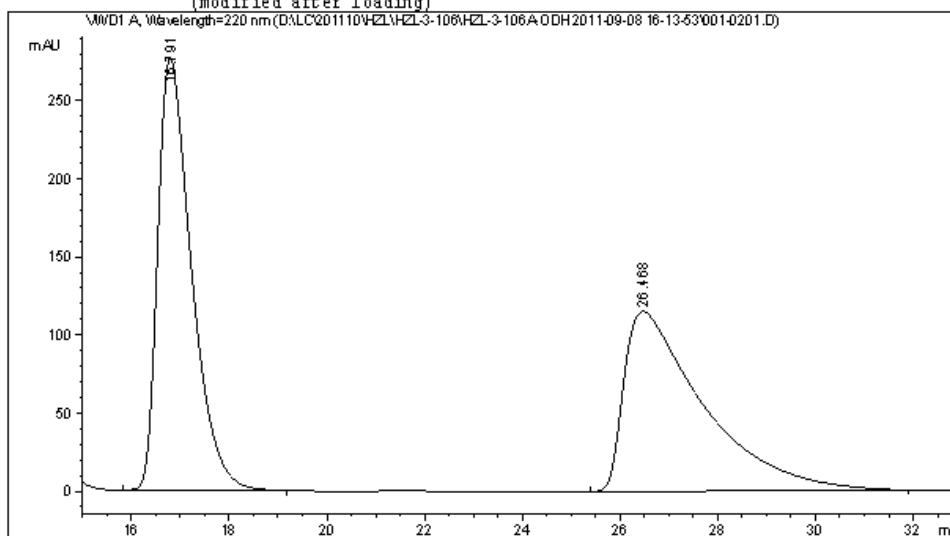

# Area Percent Report

```
Sorted By      : Signal
Multiplier     : 1.0000
Dilution       : 1.0000
Use Multiplier & Dilution Factor with ISTDs
```

Signal 1: VWD1 A, Wavelength=220 nm

| Peak # | RetTime [min] | Type | Width [min] | Area mAU  | Height [mAU] | Area %  |
|--------|---------------|------|-------------|-----------|--------------|---------|
| 1      | 16.791        | BB   | 0.7278      | 1.32454e4 | 276.51071    | 50.4540 |
| 2      | 26.468        | BB   | 1.6016      | 1.30070e4 | 115.03537    | 49.5460 |

Totals : 2.62525e4 391.54608

Instrument 1 11/8/2011 5:11:44 PM THL

Page 1 of 1

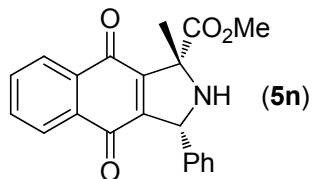

Data File D:\LC\201111\H2L\H2L-4-64-65-66\H2L-4-64A 2011-11-14 22-42-33\034-0201.D  
 Sample Name: H2L-4-64A

```
=====
Acq. Operator   : hzl                      Seq. Line :    2
Acq. Instrument : Instrument 1              Location  : Vial 34
Injection Date  : 11/14/2011 10:54:30 PM   Inj       :    1
                                           Inj Volume: 5 µl
Acq. Method     : D:\LC\201111\H2L\H2L-4-64-65-66\H2L-4-64A 2011-11-14 22-42-33\ODH-20-80-
                  10ML-220NM-35MIN.M
Last changed    : 9/13/2011 6:04:32 PM by HZL
Analysis Method : D:\LC\201111\H2L\H2L-4-64-65-66\H2L-4-64A 2011-11-14 22-42-33\034-0201.D\
                  DA.M (ODH-20-80-10ML-220NM-35MIN.M)
Last changed    : 12/15/2011 4:35:18 PM by FX
                  (modified after loading)
=====
```

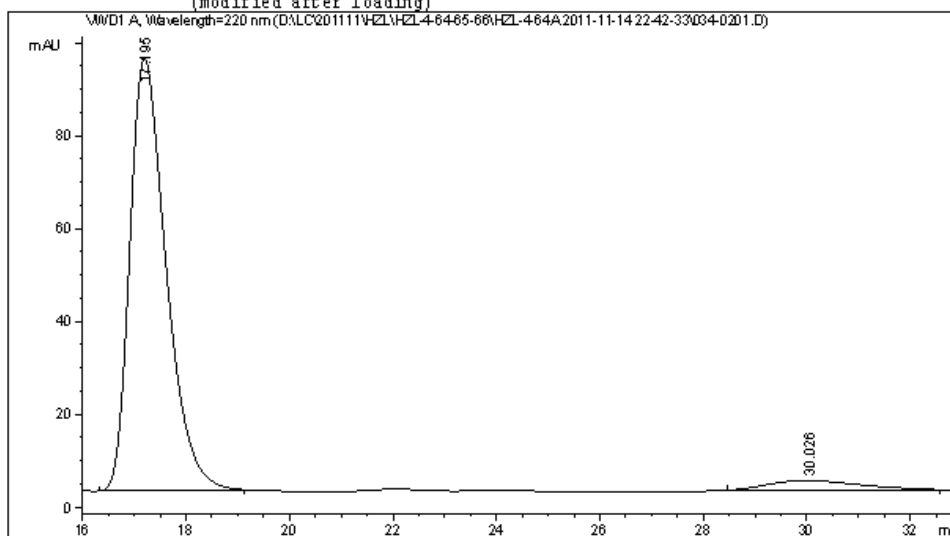

=====  
 Area Percent Report  
 =====

Sorted By : Signal  
 Multiplier : 1.0000  
 Dilution : 1.0000  
 Use Multiplier & Dilution Factor with ISTDs

Signal 1: WWD1 A, Wavelength=220 nm

| Peak # | RetTime [min] | Type | Width [min] | Area mAU   | Area %  | Height [mAU] |
|--------|---------------|------|-------------|------------|---------|--------------|
| 1      | 17.195        | BB   | 0.7464      | 4539.73438 | 94.5845 | 93.12305     |
| 2      | 30.026        | BB   | 1.4737      | 259.92557  | 5.4155  | 2.07204      |

Totals : 4799.65994 95.19509

Instrument 1 12/15/2011 4:35:23 PM FX

Page 1 of 1

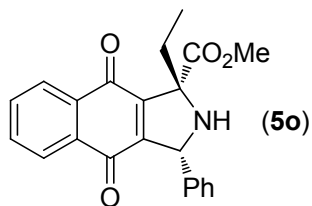

Data File D:\LC\201110\HZZ\HZZ-3-106\HZZ-3-106B 2011-09-08 17-03-40\002-0101.D  
 Sample Name: HZZ-3-106B

```
=====
Acq. Operator   : HZZ                               Seq. Line :    1
Acq. Instrument : Instrument 1                       Location  : Vial 2
Injection Date  : 9/8/2011 5:04:54 PM                Inj       :    1
                                                    Inj Volume: 5 µl
Acq. Method     : D:\LC\HZZ\Data\HZZ-3-106\HZZ-3-106B 2011-09-08 17-03-40\ASH-20-80-10ML-
                  220NM.M
Last changed    : 8/29/2011 3:56:33 PM by HZZ
Analysis Method : D:\LC\201110\HZZ\HZZ-3-106\HZZ-3-106B 2011-09-08 17-03-40\002-0101.D\DA.M
                  (ASH-20-80-10ML-220NM.M)
Last changed    : 11/8/2011 5:10:33 PM by THL
                  (modified after loading)
=====
```

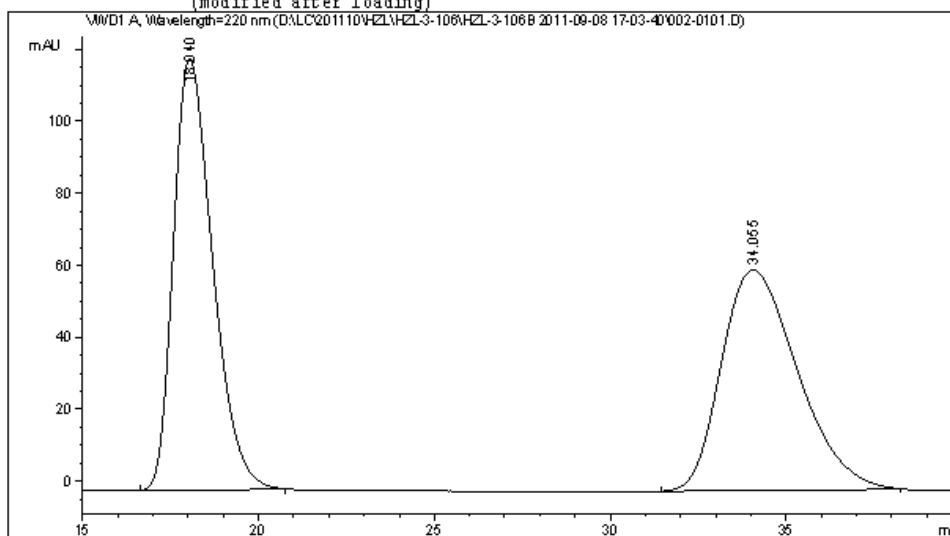

# Area Percent Report

```
Sorted By      :      Signal
Multiplier     :      1.0000
Dilution       :      1.0000
Use Multiplier & Dilution Factor with ISTDs
```

Signal 1: VWD1 A, Wavelength=220 nm

| Peak #   | RetTime [min] | Type | Width [min] | Area mAU   | Area %    | Height [mAU] |
|----------|---------------|------|-------------|------------|-----------|--------------|
| 1        | 18.040        | BB   | 1.1901      | 9286.13867 | 50.2003   | 119.93852    |
| 2        | 34.055        | BB   | 2.2053      | 9212.01758 | 49.7997   | 61.32467     |
| Totals : |               |      |             | 1.84982e4  | 181.26320 |              |



Data File D:\LC\201111\H2L\H2L-4-70\H2L-4-70A 2011-11-18 17-35-58\011-0201.D  
Sample Name: H2L-4-70A

```
=====
Acq. Operator   : H2L                      Seq. Line :    2
Acq. Instrument : Instrument 1              Location  : Vial 11
Injection Date  : 11/18/2011 5:47:53 PM    Inj       :    1
                                           Inj Volume: 5 µl
Acq. Method     : D:\LC\201111\H2L\H2L-4-70\H2L-4-70A 2011-11-18 17-35-58\ASH-20-80-10ML-
                  220NM-45MIN.M
Last changed    : 8/29/2011 3:55:38 PM by H2L
Analysis Method : D:\LC\201111\H2L\H2L-4-70\H2L-4-70A 2011-11-18 17-35-58\011-0201.D\DA.M (
                  ASH-20-80-10ML-220NM-45MIN.M)
Last changed    : 11/18/2011 6:35:11 PM by h2l
                  (modified after loading)
=====
```

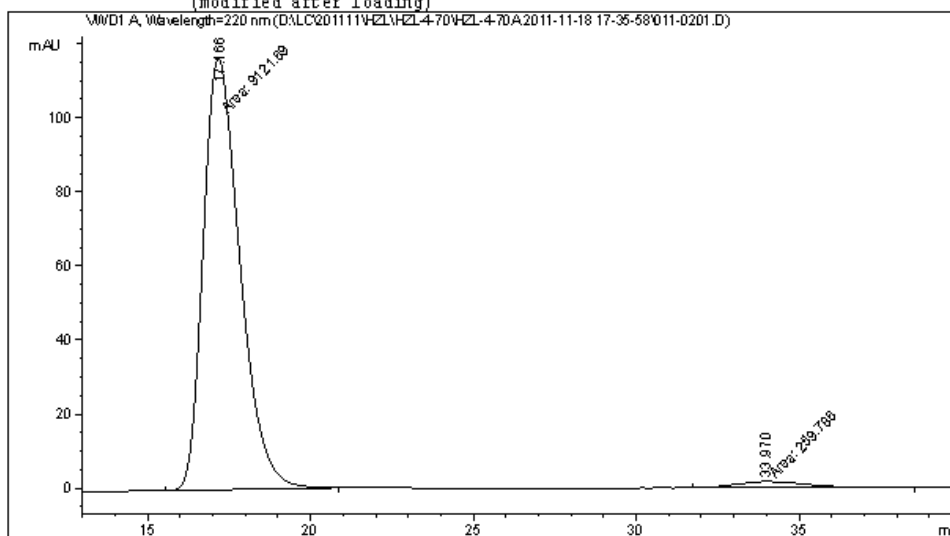

# Area Percent Report

```
Sorted By      : Signal
Multiplier     : 1.0000
Dilution       : 1.0000
Use Multiplier & Dilution Factor with ISTDs
```

Signal 1: VWD1 A, Wavelength=220 nm

| Peak # | RetTime [min] | Type | Width [min] | Area mAU   | Area %  | Height [mAU] |
|--------|---------------|------|-------------|------------|---------|--------------|
| 1      | 17.166        | MM   | 1.3060      | 9121.68848 | 97.2309 | 116.40973    |
| 2      | 33.970        | MM   | 2.5427      | 259.78558  | 2.7691  | 1.70282      |

Totals : 9381.47406 118.11255



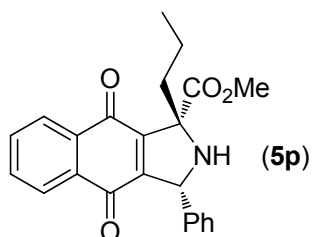

Data File D:\LC\201110\H2L\H2L-3-107\H2L-3-107C 2011-09-08 20-42-44\003-0101.D  
Sample Name: H2L-3-107C

```
=====
Acq. Operator   : H2L                      Seq. Line :    1
Acq. Instrument : Instrument 1              Location  : Vial 3
Injection Date  : 9/8/2011 8:44:06 PM      Inj       :    1
                                           Inj Volume: 5 µl
Acq. Method     : D:\LC\H2L\Data\H2L-3-107\H2L-3-107C 2011-09-08 20-42-44\ASH-20-80-10ML-
220NM.M
Last changed    : 8/29/2011 3:56:33 PM by H2L
Analysis Method : D:\LC\201110\H2L\H2L-3-107\H2L-3-107C 2011-09-08 20-42-44\003-0101.D\DA.M
(ASH-20-80-10ML-220NM.M)
Last changed    : 11/8/2011 5:09:48 PM by THL
(modified after loading)
=====
```

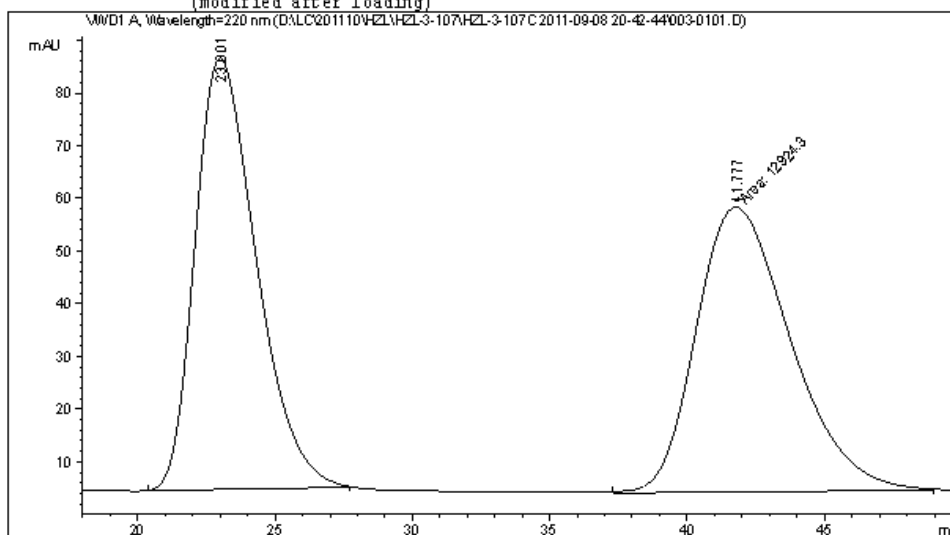

# Area Percent Report

```
Sorted By      : Signal
Multiplier     : 1.0000
Dilution       : 1.0000
Use Multiplier & Dilution Factor with ISTDs
```

Signal 1: WVD1 A, Wavelength=220 nm

| Peak # | RetTime [min] | Type | Width [min] | Area mAU *s | Height [mAU] | Area %  |
|--------|---------------|------|-------------|-------------|--------------|---------|
| 1      | 23.001        | BB   | 2.3299      | 1.26838e4   | 81.81721     | 49.5305 |
| 2      | 41.777        | MM   | 3.9866      | 1.29243e4   | 54.03196     | 50.4695 |

Totals : 2.56081e4 135.84917



Data File D:\LC\201112\H2L\H2L-4-104\H2L-4-104 2011-12-08 18-57-33\002-0201.D  
Sample Name: H2L-4-104

```
=====
Acq. Operator   : H2L                      Seq. Line :    2
Acq. Instrument : Instrument 1              Location  : Vial 2
Injection Date  : 12/8/2011 7:10:08 PM      Inj       :    1
                                           Inj Volume: 5 µl

Acq. Method     : D:\LC\201112\H2L\H2L-4-104\H2L-4-104 2011-12-08 18-57-33\ASH-20-80-10ML-
220NM-55MIN.M
Last changed    : 9/13/2011 11:19:37 AM by FX
Analysis Method : D:\LC\201112\H2L\H2L-4-104\H2L-4-104 2011-12-08 18-57-33\002-0201.D\DA.M (
ASH-20-80-10ML-220NM-55MIN.M)
Last changed    : 12/15/2011 10:42:24 AM by FX
                  (modified after loading)
=====
```

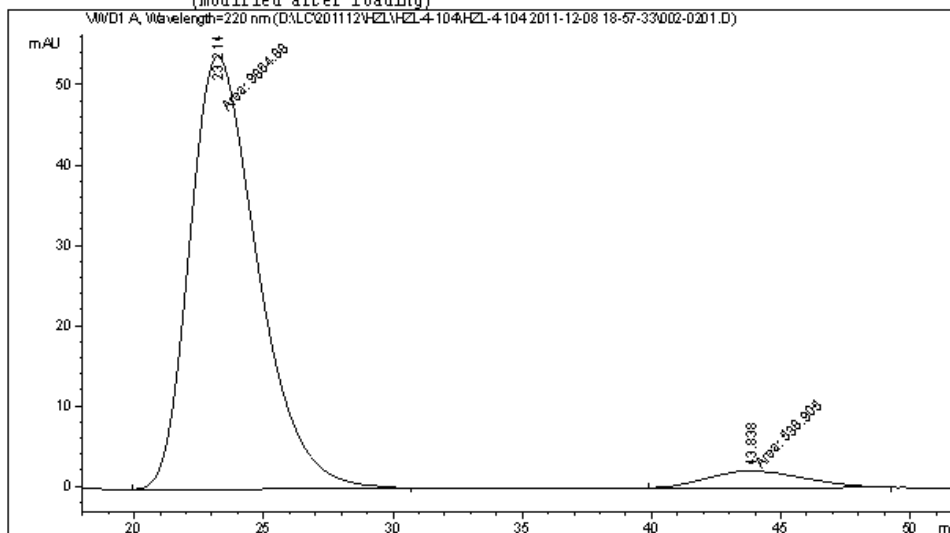

# Area Percent Report

```
Sorted By      : Signal
Multiplier     : 1.0000
Dilution       : 1.0000
Use Multiplier & Dilution Factor with ISTDs
```

Signal 1: VWD1 A, Wavelength=220 nm

| Peak # | RetTime [min] | Type | Width [min] | Area mAU *s | Height [mAU] | Area %  |
|--------|---------------|------|-------------|-------------|--------------|---------|
| 1      | 23.214        | MM   | 3.0470      | 9864.87988  | 53.95921     | 94.8201 |
| 2      | 43.838        | MM   | 4.3166      | 538.90503   | 2.08077      | 5.1799  |

Totals : 1.04038e4 56.03997

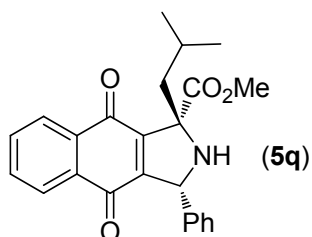

Data File D:\LC\201111\H2L\H2L-3-112B\H2L-3-112 2011-11-08 19-09-15\036-0101.D  
Sample Name: H2L-3-112B

```
=====
Acq. Operator   : hzl                      Seq. Line :    1
Acq. Instrument : Instrument 1              Location  : Vial 36
Injection Date  : 11/8/2011 7:11:11 PM      Inj       :    1
                                           Inj Volume: 5 µl
Acq. Method     : D:\LC\201111\H2L\H2L-3-112B\H2L-3-112 2011-11-08 19-09-15\ASH-30-70-10ML-
                  220NM.M
Last changed    : 10/20/2011 6:42:48 PM by HZL
Analysis Method : D:\LC\201111\H2L\H2L-3-112B\H2L-3-112 2011-11-08 19-09-15\036-0101.D\DA.M
                  (ASH-30-70-10ML-220NM.M)
Last changed    : 11/8/2011 7:44:47 PM by THL
                  (modified after loading)
=====
```

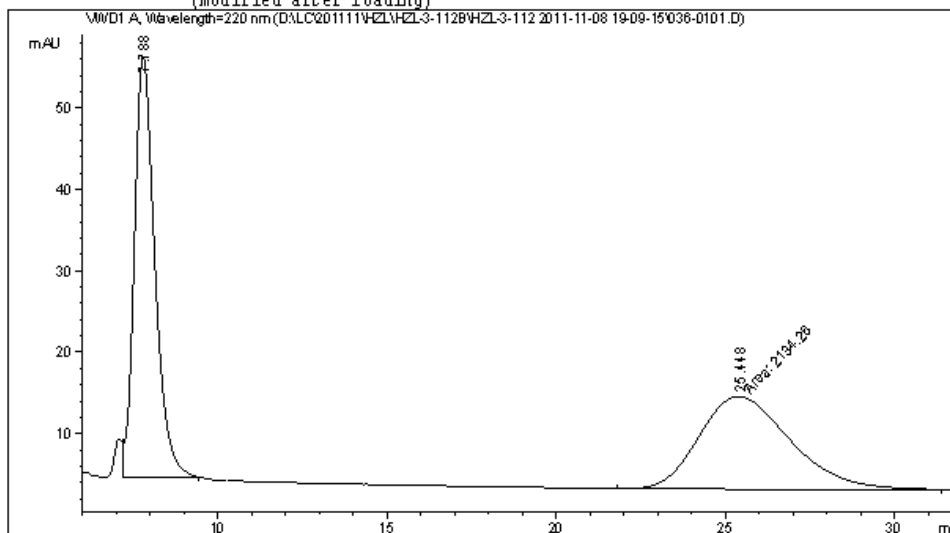

=====  
Area Percent Report  
=====

Sorted By : Signal  
Multiplier : 1.0000  
Dilution : 1.0000  
Use Multiplier & Dilution Factor with ISTDs

Signal 1: VWD1 A, Wavelength=220 nm

| Peak # | RetTime [min] | Type | Width [min] | Area mAU *s | Height [mAU] | Area %  |
|--------|---------------|------|-------------|-------------|--------------|---------|
| 1      | 7.788         | VB   | 0.6386      | 2180.77393  | 51.76181     | 50.5390 |
| 2      | 25.448        | MM   | 3.1224      | 2134.25659  | 11.39201     | 49.4610 |

Totals : 4315.03052 63.15382



Data File D:\LC\201111\H2L\H2L-4-90\H2L-4-90 2011-12-01 21-24-53\001-0201.D  
Sample Name: H2L-4-90

```
=====
Acq. Operator   : H2L                      Seq. Line :    2
Acq. Instrument : Instrument 1              Location  : Vial 1
Injection Date  : 12/1/2011 9:37:28 PM      Inj       :    1
                                           Inj Volume: 5 µl
Acq. Method     : D:\LC\201111\H2L\H2L-4-90\H2L-4-90 2011-12-01 21-24-53\ASH-30-70-10ML-
                  220NM-35MIN.M
Last changed    : 11/12/2011 3:56:16 PM by LTL
Analysis Method : D:\LC\201111\H2L\H2L-4-90\H2L-4-90 2011-12-01 21-24-53\001-0201.D\DA.M (
                  ASH-30-70-10ML-220NM-35MIN.M)
Last changed    : 12/15/2011 10:29:53 AM by FX
                  (modified after loading)
Method Info     : ASH-50-50-1ML-254NM-50MIN
=====
```

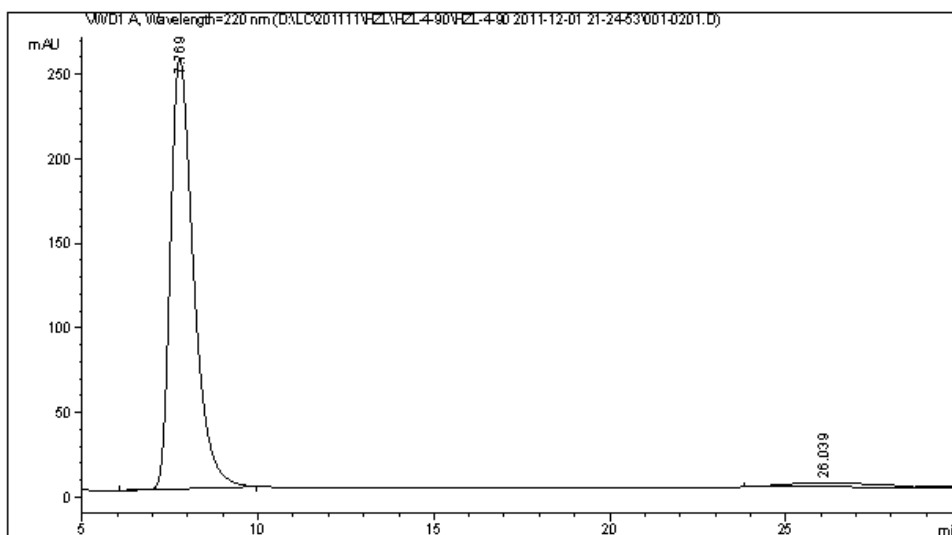

```
=====
                          Area Percent Report
=====
```

```
Sorted By      :      Signal
Multiplier     :      1.0000
Dilution       :      1.0000
Use Multiplier & Dilution Factor with ISTDs
```

Signal 1: VMD1 A, Wavelength=220 nm

| Peak # | RetTime [min] | Type | Width [min] | Area mAU *s | Height [mAU] | Area %  |
|--------|---------------|------|-------------|-------------|--------------|---------|
| 1      | 7.769         | VB   | 0.7003      | 1.16301e4   | 254.63065    | 96.2474 |
| 2      | 26.039        | BBA  | 2.1365      | 453.44806   | 2.48461      | 3.7526  |

```
Totals :                      1.20835e4  257.11526
```

Instrument 1 12/15/2011 10:30:02 AM FX

Page 1 of 2

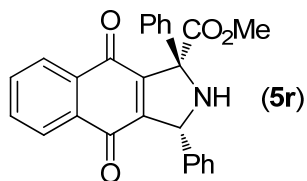

Data File D:\LC\DATA\H2L\H2L-4-85\H2L-4-85A 2011-11-25 20-53-27\001-0201.D  
 Sample Name: H2L-4-85A

```
=====
Acq. Operator   : H2L                      Seq. Line :    2
Acq. Instrument : Instrument 1              Location  : Vial 1
Injection Date  : 11/25/2011 9:05:19 PM    Inj       :    1
                                           Inj Volume: 5 µl
Acq. Method     : D:\LC\201111\H2L\H2L-4-85\H2L-4-85A 2011-11-25 20-53-27\ADH-30-70-10ML-
                  220NM.M
Last changed    : 9/15/2011 8:42:49 AM by THL
Analysis Method : D:\LC\DATA\H2L\H2L-4-85\H2L-4-85A 2011-11-25 20-53-27\001-0201.D\DA.M (
                  ADH-30-70-10ML-220NM.M)
Last changed    : 9/24/2012 10:15:51 AM by FX
                  (modified after loading)
=====
```

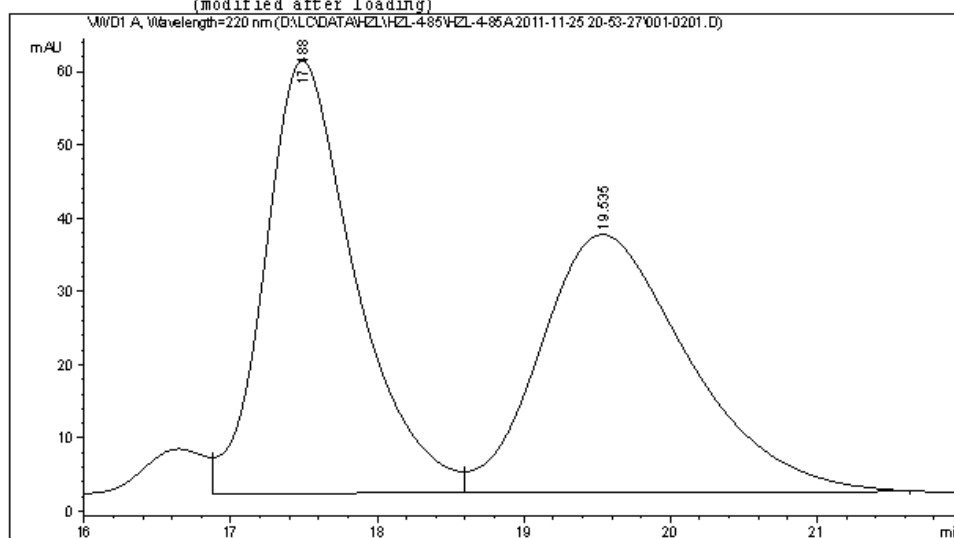

=====  
 Area Percent Report  
 =====

Sorted By : Signal  
 Multiplier : 1.0000  
 Dilution : 1.0000  
 Use Multiplier & Dilution Factor with ISTDs

Signal 1: VMD1 A, Wavelength=220 nm

| Peak #   | RetTime [min] | Type | Width [min] | Area mAU   | Area *s  | Height [mAU] | Area % |
|----------|---------------|------|-------------|------------|----------|--------------|--------|
| 1        | 17.488        | WV   | 0.6332      | 2528.17090 | 59.08281 | 50.5948      |        |
| 2        | 19.535        | VB   | 1.0471      | 2468.73096 | 35.18646 | 49.4052      |        |
| Totals : |               |      |             | 4996.90186 | 94.26928 |              |        |

Instrument 1 9/24/2012 10:15:59 AM FX

Page 1 of 1

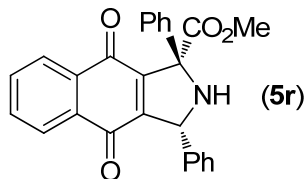

Data File D:\LC\201111\THL\H2L-4-85A\H2L-4-85A 2011-12-08 08-47-28\035-0201.D  
 Sample Name: H2L-4-103A

```
=====
Acq. Operator   : HZL                      Seq. Line :    2
Acq. Instrument : Instrument 1              Location  : Vial 35
Injection Date  : 12/8/2011 9:50:21 AM      Inj       :    1
                                           Inj Volume: 5 µl
Acq. Method     : D:\LC\201111\thl\H2L-4-85A\H2L-4-85A 2011-12-08 08-47-28\ADH-15-85-10ML-
                                           220NM-60MIN.M
Last changed    : 12/7/2011 9:20:12 PM by TMC
Analysis Method : D:\LC\201111\THL\H2L-4-85A\H2L-4-85A 2011-12-08 08-47-28\035-0201.D\DA.M (
                                           ADH-15-85-10ML-220NM-60MIN.M)
Last changed    : 12/15/2011 9:55:50 AM by FX
                                           (modified after loading)
=====
```

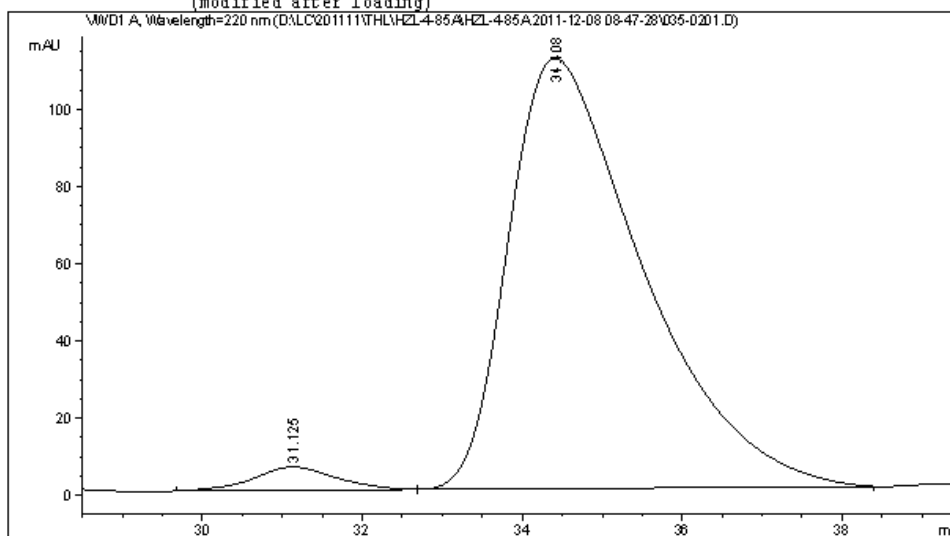

# Area Percent Report

```
Sorted By      : Signal
Multiplier     : 1.0000
Dilution       : 1.0000
Use Multiplier & Dilution Factor with ISTDs
```

Signal 1: VWD1 A, Wavelength=220 nm

| Peak #   | RetTime [min] | Type | Width [min] | Area mAU  | Area %  | Height [mAU] |
|----------|---------------|------|-------------|-----------|---------|--------------|
| 1        | 31.125        | BV   | 0.9243      | 440.21582 | 3.2697  | 6.08338      |
| 2        | 34.408        | VB   | 1.7225      | 1.30233e4 | 96.7303 | 111.48381    |
| Totals : |               |      |             | 1.34635e4 |         | 117.56719    |

Instrument 1 12/15/2011 9:56:00 AM FX

Page 1 of 1

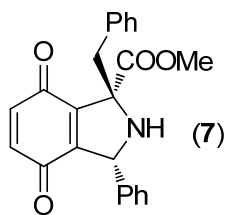

Data File D:\LC\DATA\H2L\H2L-4-96\H2L-4-96-1 2011-12-03 10-29-16\002-0101.D  
 Sample Name: H2L-4-96-1

```
=====
Acq. Operator   : H2L                      Seq. Line :    1
Acq. Instrument : Instrument 1              Location  : Vial 2
Injection Date  : 12/3/2011 10:30:18 AM     Inj       :    1
                                           Inj Volume: 5 µl
Acq. Method     : D:\LC\201112\H2L\H2L-4-96\H2L-4-96-1 2011-12-03 10-29-16\ASH-20-80-10ML-
220NM.M
Last changed    : 8/29/2011 3:56:33 PM by H2L
Analysis Method : D:\LC\DATA\H2L\H2L-4-96\H2L-4-96-1 2011-12-03 10-29-16\002-0101.D\DA.M (
ASH-20-80-10ML-220NM.M)
Last changed    : 8/14/2012 5:40:15 PM by THL
(modified after loading)
=====
```

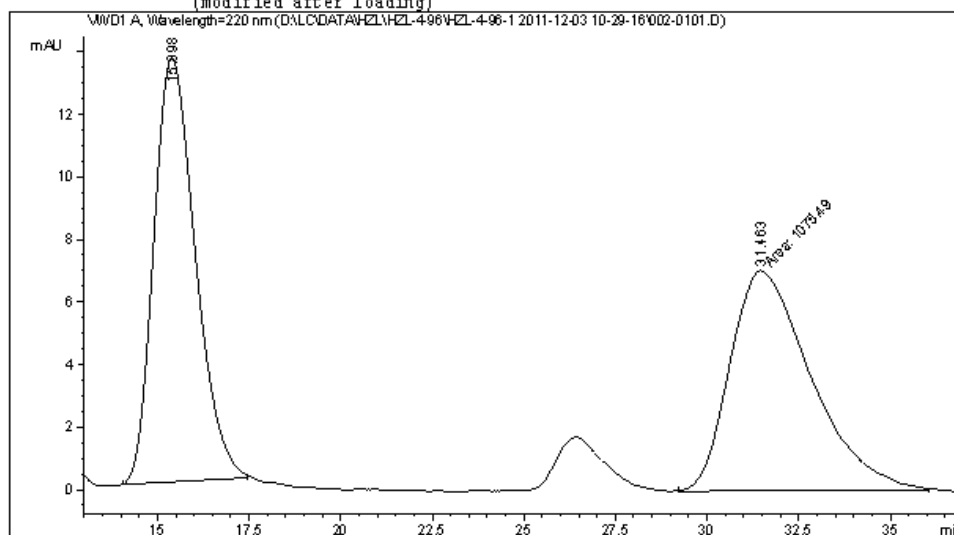

# Area Percent Report

```
Sorted By      : Signal
Multiplier     : 1.0000
Dilution       : 1.0000
Use Multiplier & Dilution Factor with ISTDs
```

Signal 1: VMD1 A, Wavelength=220 nm

| Peak # | RetTime [min] | Type | Width [min] | Area mAU *s | Height [mAU] | Area %  |
|--------|---------------|------|-------------|-------------|--------------|---------|
| 1      | 15.398        | BB   | 1.2078      | 1065.41504  | 13.53992     | 49.7646 |
| 2      | 31.463        | MM   | 2.5478      | 1075.49463  | 7.03542      | 50.2354 |

Totals : 2140.90967 20.57534



Data File D:\LC\DATA\HZL\HZL-4-111\HZL-4-111B-1 2011-12-15 09-51-47\001-0201.D  
Sample Name: HZL-4-111B-1

```
=====
Acq. Operator   : hzl                      Seq. Line :    2
Acq. Instrument : Instrument 1              Location  : Vial 1
Injection Date  : 12/15/2011 10:03:57 AM    Inj       :    1
                                           Inj Volume: 5 µl
Acq. Method     : D:\LC\201112\HZL\HZL-4-111\HZL-4-111B-1 2011-12-15 09-51-47\ASH-20-80-
                  10ML-220NM-40MIN.M
Last changed    : 8/29/2011 6:08:43 PM by HZL
Analysis Method : D:\LC\DATA\HZL\HZL-4-111\HZL-4-111B-1 2011-12-15 09-51-47\001-0201.D\DA.M
                  (ASH-20-80-10ML-220NM-40MIN.M)
Last changed    : 8/14/2012 5:42:05 PM by THL
                  (modified after loading)
=====
```

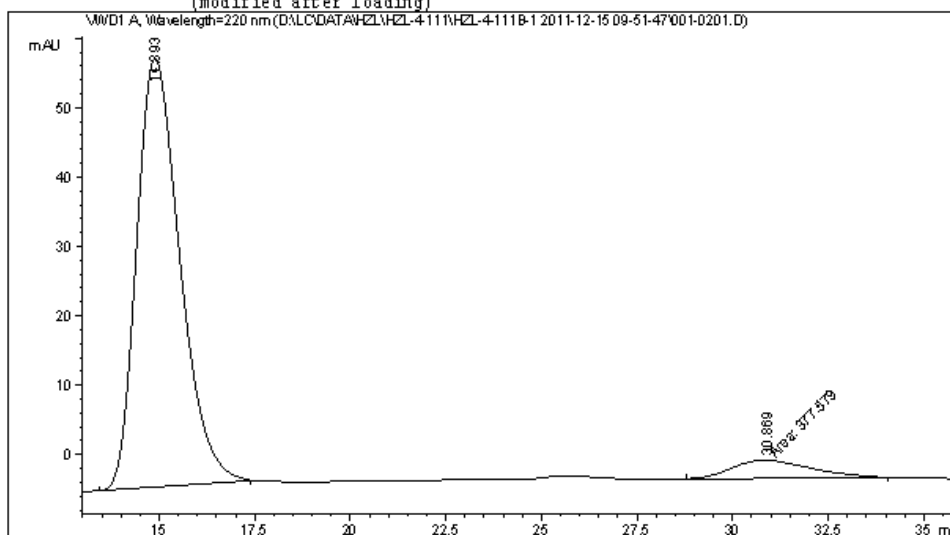

# Area Percent Report

```
Sorted By      : Signal
Multiplier     : 1.0000
Dilution       : 1.0000
Use Multiplier & Dilution Factor with ISTDs
```

Signal 1: VWD1 A, Wavelength=220 nm

| Peak # | RetTime [min] | Type | Width [min] | Area mAU *s | Height [mAU] | Area %  |
|--------|---------------|------|-------------|-------------|--------------|---------|
| 1      | 14.893        | BB   | 1.2117      | 4852.64600  | 61.79405     | 92.7808 |
| 2      | 30.869        | MM   | 2.4113      | 377.57892   | 2.60980      | 7.2192  |

Totals : 5230.22491 64.40385



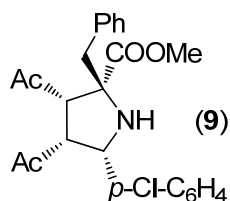

Data File D:\LC\DATA\H2L\H2L-20120423\H2L-120423-ADH 2012-05-02 16-07-31\041-0101.D  
 Sample Name: h2l-5-120423

```
=====
Acq. Operator   : h2l                      Seq. Line :    1
Acq. Instrument : Instrument 1              Location  : Vial 41
Injection Date  : 5/2/2012 4:09:01 PM      Inj       :    1
                                           Inj Volume: 5 µl
Acq. Method     : D:\LC\DATA\H2L\H2L-20120423\H2L-120423-ADH 2012-05-02 16-07-31\ADH-20-80-
                  IML-220NM.M
Last changed    : 5/2/2012 3:53:21 PM by h2l
Analysis Method : D:\LC\DATA\H2L\H2L-20120423\H2L-120423-ADH 2012-05-02 16-07-31\041-0101.D\
                  DA.M (ADH-20-80-IML-220NM.M)
Last changed    : 5/16/2012 7:38:12 PM by FX
                  (modified after loading)
=====
```

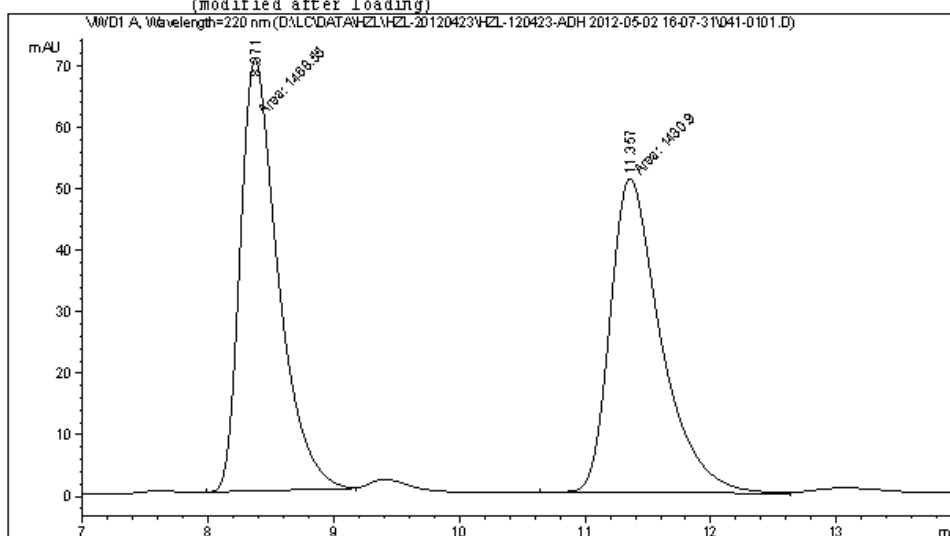

# Area Percent Report

```
Sorted By      : Signal
Multiplier     : 1.0000
Dilution       : 1.0000
Use Multiplier & Dilution Factor with ISTDs
```

Signal 1: WVD1 A, Wavelength=220 nm

| Peak # | RetTime [min] | Type | Width [min] | Area mAU   | Area %  | Height [mAU] |
|--------|---------------|------|-------------|------------|---------|--------------|
| 1      | 8.371         | MM   | 0.3496      | 1468.54810 | 50.6492 | 70.00198     |
| 2      | 11.357        | MM   | 0.4667      | 1430.90125 | 49.3508 | 51.10359     |

Totals : 2899.44934 121.10557

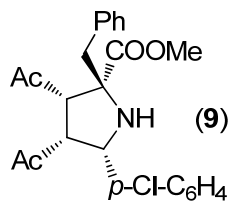

Data File D:\LC\DATA\H2L\H2L-5-122\H2L-5-122 2012-05-16 17-04-07\032-0201.D  
 Sample Name: H2L-5-122

```
=====
Acq. Operator   : H2L                      Seq. Line :    2
Acq. Instrument : Instrument 1              Location  : Vial 32
Injection Date  : 5/16/2012 5:16:41 PM      Inj       :    1
                                           Inj Volume: 5 µl
Acq. Method     : D:\LC\DATA\H2L\H2L-5-122\H2L-5-122 2012-05-16 17-04-07\ADH-20-80-1ML-
                  220NM-20MIN.M
Last changed    : 5/16/2012 5:03:19 PM by H2L
Analysis Method : D:\LC\DATA\H2L\H2L-5-122\H2L-5-122 2012-05-16 17-04-07\032-0201.D\DA.M (
                  ADH-20-80-1ML-220NM-20MIN.M)
Last changed    : 5/16/2012 7:36:53 PM by FX
                  (modified after loading)
=====
```

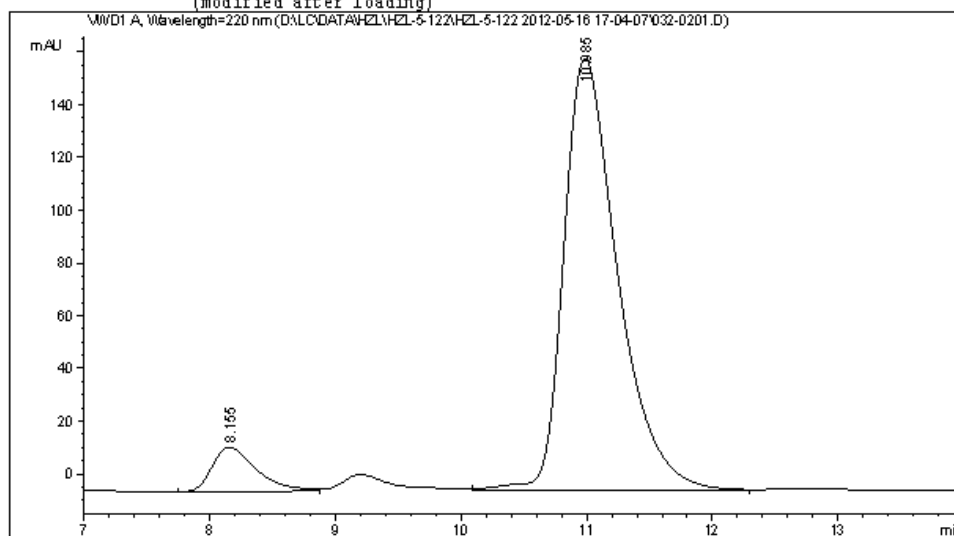

# Area Percent Report

```
Sorted By      : Signal
Multiplier     : 1.0000
Dilution      : 1.0000
Use Multiplier & Dilution Factor with ISTDs
```

Signal 1: VMD1 A, Wavelength=220 nm

| Peak # | RetTime [min] | Type | Width [min] | Area mAU   | Area *s   | Height [mAU] | Area % |
|--------|---------------|------|-------------|------------|-----------|--------------|--------|
| 1      | 8.155         | BV   | 0.3757      | 410.32269  | 16.68796  | 7.7467       |        |
| 2      | 10.985        | BB   | 0.4499      | 4886.43262 | 163.83717 | 92.2533      |        |

Totals : 5296.75531 180.52513
